# Supplementary material for: Metabolomic Profiling of Bradyrhizobium diazoefficiens-Induced Root Nodules Reveals Both Host Plant-Specific and Developmental Signatures
Source: Int J Mol Sci. 2016 May 27;17(6):815. doi: 10.3390/ijms17060815 (PMC4926349; doi:10.3390/ijms17060815)
Supplement: Supplementary file 1 [file ijms-17-00815-s001.zip › ijms-127696-Supplemental Table S8-for publication.xlsx]

## Sheet: injections
Table S8. Raw metabolomics data.
dsIdx	dsActive	dsCode	dsPert	dsAmount	dsSequence
1	TRUE	20120720171145105-470457	siratro roots roots 31dpi	1	P002#001a
2	TRUE	20120720171147073-470458	siratro roots roots 31dpi	1	P002#001b
3	TRUE	20120720171148958-470459	cowpea nodules wt 21dpi	1	P002#002a
4	TRUE	20120720171150615-470460	cowpea nodules wt 21dpi	1	P002#002b
5	TRUE	20120720171152325-470461	soybean nodules deltaNifH 21dpi	1	P002#003a
6	TRUE	20120720171154641-470462	soybean nodules deltaNifH 21dpi	1	P002#003b
7	TRUE	20120720171204579-470463	soybean nodules wt 21dpi	1	P002#004a
8	TRUE	20120720171211450-470464	soybean nodules wt 21dpi	1	P002#004b
9	TRUE	20120720171221929-470465	soybean nodules wt 31dpi	1	P002#005a
10	TRUE	20120720171228963-470466	soybean nodules wt 31dpi	1	P002#005b
11	TRUE	20120720171235110-470467	soybean nodules deltaNifH 21dpi	1	P002#006a
12	TRUE	20120720171242647-470468	soybean nodules deltaNifH 21dpi	1	P002#006b
13	TRUE	20120720171250663-470469	soybean nodules wt 31dpi	1	P002#007a
14	TRUE	20120720171253052-470470	soybean nodules wt 31dpi	1	P002#007b
15	TRUE	20120720171254688-470471	siratro roots roots 31dpi	1	P002#008a
16	TRUE	20120720171256382-470472	siratro roots roots 31dpi	1	P002#008b
17	TRUE	20120720171258254-470473	mungbean nodules wt 21dpi	1	P002#009a
18	TRUE	20120720171300039-470474	mungbean nodules wt 21dpi	1	P002#009b
19	TRUE	20120720171301749-470475	siratro nodules wt 31dpi	1	P002#010a
20	TRUE	20120720171303454-470476	siratro nodules wt 31dpi	1	P002#010b
21	TRUE	20120720171305144-470477	mungbean roots roots 21dpi	1	P002#011a
22	TRUE	20120720171306800-470478	mungbean roots roots 21dpi	1	P002#011b
23	TRUE	20120720171308900-470479	soybean nodules wt 13dpi	1	P002#012a
24	TRUE	20120720171310556-470480	soybean nodules wt 13dpi	1	P002#012b
25	TRUE	20120720171312843-470481	soybean roots roots 21dpi	1	P002#013a
26	TRUE	20120720171314505-470482	soybean roots roots 21dpi	1	P002#013b
27	TRUE	20120720171316155-470483	soybean nodules deltaNifH 21dpi	1	P002#014a
28	TRUE	20120720171317810-470484	soybean nodules deltaNifH 21dpi	1	P002#014b
29	TRUE	20120720171319469-470485	cowpea roots roots 21dpi	1	P002#015a
30	TRUE	20120720171321209-470486	cowpea roots roots 21dpi	1	P002#015b
31	TRUE	20120720171323573-470487	mungbean nodules deltaTyr 21dpi	1	P002#016a
32	TRUE	20120720171325276-470488	mungbean nodules deltaTyr 21dpi	1	P002#016b
33	TRUE	20120720171326964-470489	soybean nodules wt 13dpi	1	P002#017a
34	TRUE	20120720171329102-470490	soybean nodules wt 13dpi	1	P002#017b
35	TRUE	20120720171330772-470491	cowpea nodules deltaTyr 21dpi	1	P002#018a
36	TRUE	20120720171332448-470492	cowpea nodules deltaTyr 21dpi	1	P002#018b
37	TRUE	20120720171334104-470493	siratro nodules deltaTyr 31dpi	1	P002#019a
38	TRUE	20120720171335814-470494	siratro nodules deltaTyr 31dpi	1	P002#019b
39	TRUE	20120720171337545-470495	siratro nodules wt 31dpi	1	P002#020a
40	TRUE	20120720171339380-470496	siratro nodules wt 31dpi	1	P002#020b
41	TRUE	20120720171341095-470497	siratro nodules wt 31dpi	1	P002#021a
42	TRUE	20120720171343399-470498	siratro nodules wt 31dpi	1	P002#021b
43	TRUE	20120720171345101-470499	cowpea nodules wt 21dpi	1	P002#022a
44	TRUE	20120720171346774-470500	cowpea nodules wt 21dpi	1	P002#022b
45	TRUE	20120720171348465-470501	soybean nodules deltaNifA 21dpi	1	P002#023a
46	TRUE	20120720171350136-470502	soybean nodules deltaNifA 21dpi	1	P002#023b
47	TRUE	20120720171351992-470503	mungbean roots roots 21dpi	1	P002#024a
48	TRUE	20120720171353702-470504	mungbean roots roots 21dpi	1	P002#024b
49	TRUE	20120720171355359-470505	soybean nodules deltaNifA 21dpi	1	P002#025a
50	TRUE	20120720171357051-470506	soybean nodules deltaNifA 21dpi	1	P002#025b
51	TRUE	20120720171358724-470507	cowpea nodules deltaTyr 21dpi	1	P002#026a
52	TRUE	20120720171400378-470508	cowpea nodules deltaTyr 21dpi	1	P002#026b
53	TRUE	20120720171402058-470509	soybean nodules deltaNifA 21dpi	1	P002#027a
54	TRUE	20120720171403688-470510	soybean nodules deltaNifA 21dpi	1	P002#027b
55	TRUE	20120720171405332-470511	siratro nodules deltaTyr 31dpi	1	P002#028a
56	TRUE	20120720171406999-470512	siratro nodules deltaTyr 31dpi	1	P002#028b
57	TRUE	20120720171408738-470513	mungbean nodules wt 21dpi	1	P002#029a
58	TRUE	20120720171410425-470514	mungbean nodules wt 21dpi	1	P002#029b
59	TRUE	20120720171412082-470515	cowpea roots roots 21dpi	1	P002#030a
60	TRUE	20120720171413750-470516	cowpea roots roots 21dpi	1	P002#030b
61	TRUE	20120720171415367-470517	mungbean nodules wt 21dpi	1	P002#031a
62	TRUE	20120720171417033-470518	mungbean nodules wt 21dpi	1	P002#031b
63	TRUE	20120720171418746-470519	soybean nodules wt 31dpi	1	P002#032a
64	TRUE	20120720171420400-470520	soybean nodules wt 31dpi	1	P002#032b
65	TRUE	20120720171422099-470521	mungbean nodules deltaTyr 21dpi	1	P002#033a
66	TRUE	20120720171423818-470522	mungbean nodules deltaTyr 21dpi	1	P002#033b
67	TRUE	20120720171425496-470523	siratro nodules deltaTyr 31dpi	1	P002#034a
68	TRUE	20120720171427205-470524	siratro nodules deltaTyr 31dpi	1	P002#034b
69	TRUE	20120720171429727-470525	soybean nodules wt 13dpi	1	P002#035a
70	TRUE	20120720171431359-470526	soybean nodules wt 13dpi	1	P002#035b
71	TRUE	20120720171433062-470527	soybean roots roots 21dpi	1	P002#037a
72	TRUE	20120720171434661-470528	soybean roots roots 21dpi	1	P002#037b
73	TRUE	20120720171436248-470529	soybean nodules wt 21dpi	1	P002#038a
74	TRUE	20120720171438515-470530	soybean nodules wt 21dpi	1	P002#038b
75	TRUE	20120720171440257-470531	soybean nodules deltaTyr 21dpi	1	P002#039a
76	TRUE	20120720171441909-470532	soybean nodules deltaTyr 21dpi	1	P002#039b
77	TRUE	20120720171443600-470533	soybean nodules wt 21dpi	1	P002#040a
78	TRUE	20120720171445285-470534	soybean nodules wt 21dpi	1	P002#040b
79	TRUE	20120720171446939-470535	cowpea nodules wt 21dpi	1	P002#041a
80	TRUE	20120720171448565-470536	cowpea nodules wt 21dpi	1	P002#041b
81	TRUE	20120720171450202-470537	soybean roots roots 21dpi	1	P002#042a
82	TRUE	20120720171451841-470538	soybean roots roots 21dpi	1	P002#042b
83	TRUE	20120720171453468-470539	mungbean roots roots 21dpi	1	P002#043a
84	TRUE	20120720171455147-470540	mungbean roots roots 21dpi	1	P002#043b
85	TRUE	20120720171456742-470541	soybean nodules deltaTyr 21dpi	1	P002#045a
86	TRUE	20120720171458386-470542	soybean nodules deltaTyr 21dpi	1	P002#045b
87	TRUE	20120720171500064-470543	cowpea roots roots 21dpi	1	P002#046a
88	TRUE	20120720171501713-470544	cowpea roots roots 21dpi	1	P002#046b
89	TRUE	20120720171503368-470545	mungbean nodules deltaTyr 21dpi	1	P002#047a
90	TRUE	20120720171505083-470546	mungbean nodules deltaTyr 21dpi	1	P002#047b
91	TRUE	20120720175543028-470623	soybean nodules deltaTyr 21dpi	1	P002#036a
92	TRUE	20120720175544791-470624	soybean nodules deltaTyr 21dpi	1	P002#036b
93	TRUE	20120720175546565-470625	cowpea nodules deltaTyr 21dpi	1	P002#044a
94	TRUE	20120720175548391-470626	cowpea nodules deltaTyr 21dpi	1	P002#044b

## Sheet: ions
ionIdx	ionMz	ionAverageInt	ionQualTIC	Top annotation name	Top annotation ids	Top annotation formula	Top annotation ion	Top annotation score
1	55.0189	8613.46	0.702985	2-Propyn-1-ol	C05986	C3H4O	-H(-)	100
2	57.0346	102147	0.14633	Acetone	C00207	C3H6O	-H(-)	100
3	59.0134	187007	0.930246	Acetate; Glycolaldehyde	C00033; C00266	C2H4O2	-H(-)	100
4	70.03	12189.7	0.868278	Acrylamide	C01659	C3H5NO	-H(-)	100
5	71.014	316606	0.91312	Acrylic acid; Methylglyoxal	C00511; C00546	C3H4O2	-H(-)	100
6	72.0093	15434.9	0.837352	Iminoglycine	C15809	C2H3NO2	-H(-)	100
7	72.9934	84966	0.856445	Glyoxylate	C00048	C2H2O3	-H(-)	100
8	73.0294	79452.5	0.885353	Propanoate; (S)-Lactaldehyde; (R)-Lactaldehyde; Methyl acetate	C00163; C00424; C00937; C17530	C3H6O2	-H(-)	100
9	74.0248	9673.05	0.79954	Glycine	C00037	C2H5NO2	-H(-)	100
10	75.0089	24429.1	0.852208	Glycolate	C00160	C2H4O3	-H(-)	100
11	87.0087	178263	0.943201	Pyruvate; 3-Oxopropanoate	C00022; C00222	C3H4O3	-H(-)	100
12	87.0451	11092	0.780119	Butanoic acid	C00246	C4H8O2	-H(-)	100
13	88.9881	54538	0.814767	Oxalate	C00209	C2H2O4	-H(-)	100
14	89.0244	151979	0.935549	Glycerone; (S)-Lactate; (R)-Lactate; D-Glyceraldehyde	C00184; C00186; C00256; C00577	C3H6O3	-H(-)	100
15	91.0399	18539.8	0.876085	Glycerol	C00116	C3H8O3	-H(-)	100
16	93.0344	31255.3	0.750281	Phenol	C00146	C6H6O	-H(-)	100
17	95.0139	23751.5	0.48157	Protoanemonin; Furfural	C07090; C14279	C5H4O2	-H(-)	100
18	100.04	6987.22	0.737587	1-Aminocyclopropane-1-carboxylate; 2-Aminobut-2-enoate	C01234; C17234	C4H7NO2	-H(-)	100
19	101.025	173118	0.92562	2-Oxobutanoate; Acetoacetate; Succinate semialdehyde; (S)-Methylmalonate se.	C00109; C00164; C00232; C06002	C4H6O3	-H(-)	100
20	102.056	22791.4	0.892983	4-Aminobutanoate; L-3-Amino-isobutanoate	C00334; C03284	C4H9NO2	-H(-)	100
21	103.003	167405	0.88243	Hydroxypyruvate; Malonate; 2-Hydroxy-3-oxopropanoate	C00168; C00383; C01146	C3H4O4	-H(-)	100
22	103.016	14647.6	0.864213	Urea-1-carboxylate	C01010	C2H4N2O3	-H(-)	100
23	103.04	17458.1	0.82156	(R)-3-Hydroxybutanoate; (S)-3-Hydroxyisobutyrate	C01089; C06001	C4H8O3	-H(-)	100
24	104.035	12404.6	0.83058	L-Serine; D-Serine	C00065; C00740	C3H7NO3	-H(-)	100
25	109.03	12512	0.790789	Catechol; Resorcinol	C00090; C01751	C6H6O2	-H(-)	100
26	109.041	7082.5	0.821146	Imidazole-4-acetaldehyde	C05130	C5H6N2O	-H(-)	100
27	111.009	209407	0.747757	2-Furoate	C01546	C5H4O3	-H(-)	100
28	111.021	28117	0.843982	Uracil	C00106	C4H4N2O2	-H(-)	100
29	113.025	277101	0.826169	cis-Acetylacrylate	C07091	C5H6O3	-H(-)	100
30	113.036	306765	0.869279	5,6-Dihydrouracil; 3-Cyano-L-alanine; N-Methylhydantoin	C00429; C02512; C02565	C4H6N2O2	-H(-)	100
31	114.056	43097.4	0.869012	L-Proline	C00148	C5H9NO2	-H(-)	100
32	115.004	1.77337e+06	0.932524	Fumarate; Maleic acid	C00122; C01384	C4H4O4	-H(-)	100
33	116.035	15723.1	0.719024	L-Aspartate 4-semialdehyde	C00441	C4H7NO3	-H(-)	100
34	116.072	204438	0.86774	L-Valine	C00183	C5H11NO2	-H(-)	100
35	117.019	302736	0.850226	Succinate; Methylmalonate	C00042; C02170	C4H6O4	-H(-)	100
36	118.051	46836.2	0.855298	L-Threonine; L-Homoserine; L-Allothreonine	C00188; C00263; C05519	C4H9NO3	-H(-)	100
37	118.98	54735.1	0.270745	Mercaptopyruvate	C00957	C3H4O3S	-H(-)	100
38	119.05	255312	0.876792	Phenylacetaldehyde; p-Tolualdehyde; 3-Methylbenzaldehyde; 2-Methylbenzaldehyde	C00601; C06758; C07209; C07214	C8H8O	-H(-)	100
39	120.045	21176.9	0.754627	Benzamide	C09815	C7H7NO	-H(-)	100
40	121.03	705971	0.907023	Benzoate; 4-Hydroxybenzaldehyde; 3-Hydroxybenzaldehyde	C00180; C00633; C03067	C7H6O2	-H(-)	100
41	121.041	91514.6	0.730415	Nicotinamide	C00153	C6H6N2O	-H(-)	100
42	125.024	1.19959e+06	0.77025	Benzene-1,2,4-triol; 5-Hydroxymethyl-2-furaldehyde	C02814; C11101	C6H6O3	-H(-)	100
43	125.036	131215	0.439657	Thymine; Imidazole-4-acetate	C00178; C02835	C5H6N2O2	-H(-)	100
44	126.092	9434.02	0.809561	N-Cyclohexylformamide	C11519	C7H13NO	-H(-)	100
45	127.051	96887.4	0.917099	5,6-Dihydrothymine; gamma-Amino-gamma-cyanobutanoate	C00906; C05715	C5H8N2O2	-H(-)	100
46	128.036	443455	0.915812	L-1-Pyrroline-3-hydroxy-5-carboxylate	C04281	C5H7NO3	-H(-)	100
47	128.071	66346.4	0.896044	N4-Acetylaminobutanal	C05936	C6H11NO2	-H(-)	100
48	129.019	494244	0.953962	2,5-Dioxopentanoate; Itaconate; 2-Methylmaleate	C00433; C00490; C02226	C5H6O4	-H(-)	100
49	129.055	136222	0.796088	4-Methyl-2-oxopentanoate; (S)-3-Methyl-2-oxopentanoic acid; 1-Oxa-2-oxo-3-h...	C00233; C00671; C12314	C6H10O3	-H(-)	100
50	129.103	21128.9	0.798301	N-Acetylputrescine	C02714	C6H14N2O	-H(-)	100
51	130.051	78226.8	0.90719	5-Aminolevulinate; 5-Amino-2-oxopentanoic acid; Hydroxyproline; L-Glutamate...	C00430; C01110; C01157; C01165; C03741	C5H9NO3	-H(-)	100
52	130.087	514265	0.9056	L-Leucine; L-Isoleucine	C00123; C00407	C6H13NO2	-H(-)	100
53	131.046	1.82006e+06	0.927626	L-Asparagine; N-Carbamoylsarcosine; 3-Ureidopropionate	C00152; C01043; C02642	C4H8N2O3	-H(-)	100
54	132.042	224255	0.959935	(S)-Ureidoglycine	C02091	C3H7N3O3	-H(-)	100
55	133.015	1.59888e+07	0.935869	(S)-Malate; (R)-Malate	C00149; C00497	C4H6O5	-H(-)	100
56	135.045	365968	0.943948	Toluate; 4-Hydroxyphenylacetaldehyde; 3-Vinylcatechol; Phenylacetic acid; m...	C01454; C03765; C07085; C07086; C07211; C07215; C10700	C8H8O2	-H(-)	100
57	136.04	127642	0.823106	Anthranilate; 4-Aminobenzoate	C00108; C00568	C7H7NO2	-H(-)	100
58	136.076	17207.6	0.693815	Tyramine	C00483	C8H11NO	-H(-)	100
59	138.019	172031	0.208659	4-Nitrophenol; 6-Hydroxynicotinate	C00870; C01020	C6H5NO3	-H(-)	100
60	140.012	48414.5	0.375298	Ethanolamine phosphate	C00346	C2H8NO4P	-H(-)	100
61	140.083	55952.6	0.0877571	L-Histidinol	C00860	C6H11N3O	-H(-)	100
62	141.019	729668	0.785311	2-Hydroxymuconate semialdehyde; cis,cis-Muconate; 2-Oxo-2,3-dihydrofuran-5-...	C00682; C02480; C03586; C14610; C20448	C6H6O4	-H(-)	100
63	141.068	23399	0.654377	Ectoine	C06231	C6H10N2O2	-H(-)	100
64	144.067	141789	0.900231	4-Acetamidobutanoate; 6-Amino-2-oxohexanoate	C02946; C03239	C6H11NO3	-H(-)	100
65	145.014	497959	0.953965	2-Oxoglutarate	C00026	C5H6O5	-H(-)	100
66	145.05	122024	0.82577	2-Dehydropantoate; (S)-2-Aceto-2-hydroxybutanoate; (R)-3-Hydroxy-3-methyl-2...	C00966; C06006; C14463; C16272	C6H10O4	-H(-)	100
67	145.062	656559	0.948687	L-Glutamine; D-Glutamine; 3-Ureidoisobutyrate	C00064; C00819; C05100	C5H10N2O3	-H(-)	100
68	146.046	1.22222e+06	0.960034	L-Glutamate; D-Glutamate; Glutamate; O-Acetyl-L-serine; L-4-Hydroxyglutamat...	C00025; C00217; C00302; C00979; C05938	C5H9NO4	-H(-)	100
69	147.03	954467	0.832446	(R)-2-Methylmalate; 2-Hydroxyglutarate; D-erythro-3-Methylmalate	C02612; C02630; C06032	C5H8O5	-H(-)	100
70	147.045	389851	0.954369	trans-Cinnamate	C00423	C9H8O2	-H(-)	100
71	148.042	42282.1	0.815824	(S)-4-Hydroxymandelonitrile	C03742	C8H7NO2	-H(-)	63
72	149.009	733789	0.670092	meso-Tartaric acid; (R,R)-Tartaric acid	C00552; C00898	C4H6O6	-H(-)	100
73	149.046	5.31585e+06	0.889881	D-Ribose; D-Xylose; D-Ribulose; D-Xylulose	C00121; C00181; C00309; C00310	C5H10O5	-H(-)	100
74	151.026	51839.6	0.900723	Xanthine	C00385	C5H4N4O2	-H(-)	100
75	151.04	179651	0.855929	4-Hydroxyphenylacetate; (R)-Mandelate; (S)-Mandelate; 3,4-Dihydroxyphenylac...	C00642; C01983; C01984; C04043; C05593; C05852; C13636; C14088; C14103	C8H8O3	-H(-)	100
76	151.061	91786	0.894919	Ribitol	C00474	C5H12O5	-H(-)	100
77	151.112	22478.9	0.654395	Limonene-1,2-epoxide; Myrtenol; Pinocarveol; (4S)-Limonene-1,2-epoxide	C07271; C11938; C11941; C19081	C10H16O	-H(-)	100
78	152.034	69941.5	0.889921	3-Hydroxyanthranilate	C00632	C7H7NO3	-H(-)	55
79	152.071	31764.1	0.861687	Dopamine	C03758	C8H11NO2	-H(-)	100
80	152.995	44306.1	0.932329	Propanoyl phosphate	C02876	C3H7O5P	-H(-)	100
81	153.019	183622	0.925869	3,4-Dihydroxybenzoate; 2,5-Dihydroxybenzoate	C00230; C00628	C7H6O4	-H(-)	100
82	154.062	278390	0.795129	L-Histidine	C00135	C6H9N3O2	-H(-)	100
83	154.975	33012.1	0.787604	2-Phosphoglycolate	C00988	C2H5O6P	-H(-)	100
84	155.009	27310.8	0.486789	Orotate	C00295	C5H4N2O4	-H(-)	100
85	155.035	433256	0.91085	3-Methyl-cis,cis-hexadienedioate; 3-Methylmuconolactone; 4-Methylmuconolact...	C04112; C04558; C04559; C06210; C06760	C7H8O4	-H(-)	100
86	157.014	78495.1	0.262433	2-Maleylacetate; 2-Hydroxymuconate; gamma-Oxalocrotonate; 3-Hydroxy-cis,cis...	C02222; C02501; C03453; C03676	C6H6O5	-H(-)	100
87	157.036	244565	0.910919	(R)(-)-Allantoin; (S)-Allantoin	C02348; C02350	C4H6N4O3	-H(-)	100
88	157.05	170255	0.773062	2-Isopropylmaleate	C02631	C7H10O4	-H(-)	100
89	158.061	58535.3	0.730107	Indole-3-acetaldehyde	C00637	C10H9NO	-H(-)	100
90	159.03	695034	0.937349	2-Oxoadipate; 3-Oxoadipate; 2-Formylglutarate; 2,4-Diketo-3-deoxy-L-fuconate	C00322; C00846; C16159; C20781	C6H8O5	-H(-)	100
91	159.045	254673	0.899713	Naphthalene-1,2-diol	C03012	C10H8O2	-H(-)	100
92	160.061	105729	0.918053	L-2-Aminoadipate; O-Acetyl-L-homoserine	C00956; C01077	C6H11NO4	-H(-)	100
93	161.045	3.25169e+06	0.96143	2-Dehydro-3-deoxy-L-fuconate; L-Fucono-1,5-lactone	C03827; C18028	C6H10O5	-H(-)	100
94	163.039	296927	0.850038	Phenylpyruvate; cis-2-Hydroxycinnamate; trans-3-Hydroxycinnamate	C00166; C05838; C12621	C9H8O3	-H(-)	100
95	163.061	264654	0.882381	6-Deoxy-L-galactose	C01019	C6H12O5	-H(-)	100
96	164.035	56958.7	0.703179	Formylanthranilate	C05653	C8H7NO3	-H(-)	100
97	164.072	295027	0.950123	L-Phenylalanine; D-Phenylalanine	C00079; C02265	C9H11NO2	-H(-)	100
98	165.019	204365	0.782395	4-Hydroxyphenylglyoxylate	C03590	C8H6O4	-H(-)	100
99	166.05	73222.5	0.871608	Pyridoxal	C00250	C8H9NO3	-H(-)	100
100	166.06	25834	0.865942	2,4-Diamino-6-nitrotoluene	C16396	C7H9N3O2	-H(-)	30
101	166.975	34629	0.799132	Phosphoenolpyruvate	C00074	C3H5O6P	-H(-)	100
102	167.021	27976.5	0.869602	Urate	C00366	C5H4N4O3	-H(-)	100
103	167.034	528373	0.872397	Homogentisate; 3,4-Dihydroxyphenylacetate; (S)-4-Hydroxymandelate; (R)-4-Hy...	C00544; C01161; C03198; C05343; C05577; C07087; C14109	C8H8O4	-H(-)	100
104	167.082	33241.4	0.809235	Pyridoxamine	C00534	C8H12N2O2	-H(-)	100
105	167.997	32948.8	0.871219	L-Cysteate	C00506	C3H7NO5S	-H(-)	100
106	170.046	35169.2	0.726249	2,3,4,5-Tetrahydrodipicolinate	C03972	C7H9NO4	-H(-)	100
107	171.006	93766.7	0.955284	sn-Glycerol 3-phosphate	C00093	C3H9O6P	-H(-)	100
108	171.03	73933.3	0.904647	3-Dehydroshikimate; 2-Oxohept-3-enedioate; 2-Hydroxyhepta-2,4-dienedioate; ...	C02637; C03063; C05600; C07478; C07479; C18306	C7H8O5	-H(-)	100
109	172.061	191053	0.951733	N-Acetyl-L-glutamate 5-semialdehyde	C01250	C7H11NO4	-H(-)	100
110	173.009	259071	0.908632	cis-Aconitate	C00417	C6H6O6	-H(-)	100
111	173.045	213144	0.834775	Shikimate; (2S)-2-Isopropyl-3-oxosuccinate; 2-Methyl-3-oxoadipate	C00493; C04236; C18307	C7H10O5	-H(-)	100
112	173.057	64074.3	0.906937	N-Formimino-L-glutamate	C00439	C6H10N2O4	-H(-)	100
113	173.093	193919	0.952899	N-Acetylornithine	C00437	C7H14N2O3	-H(-)	100
114	174.041	45008.8	0.825586	7-Cyano-7-carbaguanine	C15996	C7H5N5O	-H(-)	100
115	174.056	35377.6	0.848611	Indole-3-acetate; 5-Hydroxyindoleacetaldehyde	C00954; C05634	C10H9NO2	-H(-)	100
116	174.088	67624.9	0.938659	L-Citrulline	C00327	C6H13N3O3	-H(-)	100
117	175.025	209046	0.894314	D-Glucuronolactone; (4S)-4,6-Dihydroxy-2,5-dioxohexanoate; Parapyruvate	C02670; C04349; C06033	C6H8O6	-H(-)	100
118	175.047	275619	0.967793	Allantoate	C00499	C4H8N4O4	-H(-)	100
119	175.061	595667	0.913741	alpha-Isopropylmalate; (2R,3S)-3-Isopropylmalate	C02504; C04411	C7H12O5	-H(-)	100
120	177.04	549843	0.924699	D-Glucono-1,5-lactone; 2-Dehydro-3-deoxy-D-gluconate; L-Gulono-1,4-lactone;...	C00198; C00204; C01040; C01115; C01216; C03383	C6H10O6	-H(-)	100
121	178.051	102633	0.901868	Hippurate	C01586	C9H9NO3	-H(-)	100
122	179.038	152726	0.921292	5-Methylthio-D-ribose	C03089	C6H12O4S	-H(-)	100
123	179.056	6.82677e+06	0.96713	D-Glucose; D-Fructose; D-Galactose; myo-Inositol; D-Mannose; beta-D-Glucose...	C00031; C00095; C00124; C00137; C00159; C00221; C00267; C00984; C01720; C01825; C02336	C6H12O6	-H(-)	100
124	181.051	411436	0.600178	3-(2,3-Dihydroxyphenyl)propanoate; 3-Methoxy-4-hydroxyphenylglycolaldehyde;...	C04044; C05583; C12622	C9H10O4	-H(-)	100
125	182.97	194778	0.863052	3-Phosphonooxypyruvate	C03232	C3H5O7P	-H(-)	100
126	183.066	50371.7	0.760563	cis-3-(Carboxy-ethyl)-3,5-cyclo-hexadiene-1,2-diol; Choline phosphate	C00588; C11588	C5H15NO4P; C9H12O4	-H(-); -H(-)	100
127	184.001	254023	0.84648	O-Phospho-L-serine	C01005	C3H8NO6P	-H(-)	100
128	184.985	100792	0.0533189	3-Phospho-D-glycerate; 2-Phospho-D-glycerate	C00197; C00631	C3H7O7P	-H(-)	100
129	186.113	24545.5	0.836157	8-Amino-7-oxononanoate	C01092	C9H17NO3	-H(-)	100
130	188.056	571371	0.959689	N-Acetyl-L-glutamate	C00624	C7H11NO5	-H(-)	100
131	189.041	59263.5	0.889234	3-Dehydroquinate; 4-Hydroxy-2-oxo-heptanedioate; 2,4-Dihydroxyhept-2-enedioate	C00944; C05601; C06201	C7H10O6	-H(-)	100
132	189.077	330000	0.910993	(R)-3-((R)-3-Hydroxybutanoyloxy)butanoate	C04546	C8H14O5	-H(-)	100
133	190.05	34598.2	0.881206	5-Hydroxyindoleacetate; 5-Phenyl-1,3-oxazinane-2,4-dione	C05635; C16596	C10H9NO3	-H(-)	100
134	191.02	6.90212e+06	0.682577	Citrate; Isocitrate; 5-Dehydro-4-deoxy-D-glucarate; 2-Dehydro-3-deoxy-D-glu...	C00158; C00311; C00679; C03921	C6H8O7	-H(-)	100
135	192.066	112621	0.947947	3-Carbamoyl-2-phenylpropionaldehyde; 4-Hydroxy-5-phenyltetrahydro-1,3-oxazi...	C16587; C16595	C10H11NO3	-H(-)	100
136	193.035	139022	0.942528	D-Galacturonate; D-Fructuronate; 5-Dehydro-D-gluconate	C00333; C00905; C01062	C6H10O7	-H(-)	100
137	195.051	4.9361e+06	0.952031	D-Gluconic acid; D-Mannonate; L-Idonate; L-Gulonate; D-Altronate	C00257; C00514; C00770; C00800; C00817	C6H12O7	-H(-)	100
138	203.082	655351	0.943001	L-Tryptophan	C00078	C11H12N2O2	-H(-)	100
139	204.052	25238.8	0.802337	Lipoamide	C00248	C8H15NOS2	-H(-)	100
140	209.03	2.77891e+06	0.892563	D-Glucarate; D-Galactarate	C00818; C00879	C6H10O8	-H(-)	100
141	211.997	10279	0.754266	4-Phospho-L-aspartate; 2-Amino-3-oxo-4-phosphonooxybutyrate	C03082; C07335	C4H8NO7P	-H(-)	100
142	212.03	20337.1	0.790705	4-Hydroxylamino-2,6-dinitrotoluene; 2-Hydroxylamino-4,6-dinitrotoluene	C16392; C16393	C7H7N3O5	-H(-)	45
143	212.979	77762.7	0.491097	2-Oxo-3-hydroxy-4-phosphobutanoate	C06054	C4H7O8P	-H(-)	82
144	213.016	49064.9	0.824789	2-Deoxy-D-ribose 1-phosphate; 2-Deoxy-D-ribose 5-phosphate; 1-Deoxy-D-xylul...	C00672; C00673; C11437; C16637	C5H11O7P	-H(-)	100
145	213.126	25169	0.862358	Dethiobiotin	C01909	C10H18N2O3	-H(-)	76
146	214.012	69494.8	0.864391	O-Phospho-4-hydroxy-L-threonine	C06055	C4H10NO7P	-H(-)	100
147	214.048	148754	0.956804	sn-Glycero-3-phosphoethanolamine	C01233	C5H14NO6P	-H(-)	100
148	215.02	64478.8	0.839115	5-Carboxy-2-oxohept-3-enedioate; 5-Carboxymethyl-2-hydroxymuconate	C04052; C04186	C8H8O7	-H(-)	100
149	215.033	373458	0.768266	2-C-Methyl-D-erythritol 4-phosphate	C11434	C5H13O7P	-H(-)	100
150	215.071	60224.1	0.892028	Bis(4-hydroxyphenyl)methanol	C18215	C13H12O3	-H(-)	100
151	218.033	46351.7	0.866039	4-Amino-2-methyl-5-phosphomethylpyrimidine	C04556	C6H10N3O4P	-H(-)	100
152	218.067	919507	0.953188	O-Succinyl-L-homoserine	C01118	C8H13NO6	-H(-)	100
153	218.103	226616	0.970577	Pantothenate	C00864	C9H17NO5	-H(-)	100
154	220.083	33910.3	0.921716	N-Acetyl-D-glucosamine; N-Acetyl-D-mannosamine; N-Acetyl-D-galactosamine	C00140; C00645; C01132	C8H15NO6	-H(-)	100
155	225.041	50308.6	0.834902	Chorismate; Prephenate	C00251; C00254	C10H10O6	-H(-)	100
156	225.087	50811.6	0.952874	Porphobilinogen	C00931	C10H14N2O4	-H(-)	100
157	226.012	49532	0.750699	L-Glutamyl 5-phosphate	C03287	C5H10NO7P	-H(-)	100
158	227.071	46389.6	0.91875	Resveratrol	C03582	C14H12O3	-H(-)	100
159	228.027	16320.3	0.323002	5-Phosphoribosylamine	C03090	C5H12NO7P	-H(-)	100
160	229.012	100393	0.943081	D-Ribose 5-phosphate; D-Ribulose 5-phosphate; D-Xylulose 5-phosphate; alpha...	C00117; C00199; C00231; C00620; C01112	C5H11O8P	-H(-)	100
161	235.073	75968	0.935797	L-Formylkynurenine	C02700	C11H12N2O4	-H(-)	100
162	237.061	353654	0.970279	3-Deoxy-D-manno-octulosonate	C01187	C8H14O8	-H(-)	100
163	238.094	31364.4	0.941231	Dihydrobiopterin	C00268	C9H13N5O3	-H(-)	100
164	243.027	140342	0.871689	L-Fuculose 1-phosphate	C01099	C6H13O8P	-H(-)	100
165	243.062	351467	0.968381	Uridine	C00299	C9H12N2O6	-H(-)	100
166	253.051	1.67267e+07	0.960019	5-L-Glutamyl-taurine	C05844	C7H14N2O6S	-H(-)	79
167	255.233	1.53656e+07	0.974118	Hexadecanoic acid	C00249	C16H32O2	-H(-)	100
168	258.039	30891.6	0.902305	D-Glucosamine 6-phosphate; alpha-D-Glucosamine 1-phosphate; Aminofructose 6...	C00352; C06156; C12214	C6H14NO8P	-H(-)	100
169	259.023	994535	0.958269	D-Fructose 6-phosphate; D-Glucose 6-phosphate; D-Glucose 1-phosphate; D-Man...	C00085; C00092; C00103; C00275; C00636; C00668; C01094; C01097; C01172; C01177; C02888; C03546; C04006; C05345	C6H13O9P	-H(-)	100
170	260.114	102172	0.942911	Lotaustralin	C08334	C11H19NO6	-H(-)	100
171	264.951	21082.9	0.42333	3-Phospho-D-glyceroyl phosphate	C00236	C3H8O10P2	-H(-)	84
172	267.073	740597	0.980219	Inosine	C00294	C10H12N4O5	-H(-)	100
173	277.123	90000.3	0.965212	Pantetheine	C00831	C11H22N2O4S	-H(-)	100
174	282.084	162805	0.966623	Guanosine	C00387	C10H13N5O5	-H(-)	100
175	283.206	16624.3	0.930105	Retinal	C00376	C20H28O	-H(-)	75
176	289.116	122496	0.87603	N-(L-Arginino)succinate	C03406	C10H18N4O6	-H(-)	100
177	292.104	40423.1	0.945812	N-Acetylmuramate	C02713	C11H19NO8	-H(-)	100
178	293.212	3.74422e+06	0.969378	13-OxoODE	C14765	C18H30O3	-H(-)	100
179	295.228	2.65331e+06	0.969195	13(S)-HODE	C14762	C18H32O3	-H(-)	100
180	298	15430.5	0.617608	2-Methyl-4-amino-5-hydroxymethylpyrimidine diphosphate	C04752	C6H11N3O7P2	-H(-)	100
181	298.069	41511.9	0.859156	D-4'-Phosphopantothenate	C03492	C9H18NO8P	-H(-)	100
182	300.049	147251	0.949787	N-Acetyl-D-mannosamine 6-phosphate; N-Acetyl-alpha-D-glucosamine 1-phosphate	C04257; C04501	C8H16NO9P	-H(-)	100
183	306.049	23222.6	0.92262	dCMP	C00239	C9H14N3O7P	-H(-)	100
184	312.059	72959.1	0.954695	2-(Formamido)-N1-(5'-phosphoribosyl)acetamidine	C04640	C8H16N3O8P	-H(-)	100
185	317.03	41155.4	0.848417	3-Deoxy-D-manno-octulosonate 8-phosphate	C04478	C8H15O11P	-H(-)	36
186	322.045	58903.1	0.923901	CMP	C00055	C9H14N3O8P	-H(-)	100
187	323.029	200626	0.9678	UMP	C00105	C9H13N2O9P	-H(-)	100
188	325.094	78476.8	0.964674	cis-beta-D-Glucosyl-2-hydroxycinnamate	C05839	C15H18O8	-H(-)	100
189	331.046	55454.6	0.877339	2'-Deoxyinosine 5'-phosphate	C06196	C10H13N4O7P	-H(-)	100
190	335.04	49668.3	0.829095	Nicotinate D-ribonucleotide	C01185	C11H15NO9P	-H(-)	44
191	338.038	18758.6	0.864848	1-(5-Phospho-D-ribosyl)-5-amino-4-imidazolecarboxylate; 5-Carboxyamino-1-(5...	C04751; C15667	C9H14N3O9P	-H(-)	66
192	338.989	53602.3	0.0624607	D-Fructose 1,6-bisphosphate; D-Mannose 1,6-bisphosphate; D-Tagatose 1,6-bis...	C00354; C03693; C03785; C05378	C6H14O12P2	-H(-)	100
193	341.11	2.54339e+07	0.9298	Sucrose; Cellobiose; Maltose; alpha,alpha-Trehalose	C00089; C00185; C00208; C01083	C12H22O11	-H(-)	100
194	344.04	31341.4	0.866916	3',5'-Cyclic GMP	C00942	C10H12N5O7P	-H(-)	100
195	344.07	32706.7	0.946995	Thiamin monophosphate	C01081	C12H18N4O4PS	-H(-)	31
196	346.056	303383	0.964986	AMP; dGMP	C00020; C00362	C10H14N5O7P	-H(-)	100
197	348.087	27687.4	0.91578	S-(Formylmethyl)glutathione	C14871	C12H19N3O7S	-H(-)	100
198	354.001	11232.6	0.749736	2-Amino-7,8-dihydro-4-hydroxy-6-(diphosphooxymethyl)pteridine	C04807	C7H11N5O8P2	-H(-)	100
199	362.051	51138.7	0.865879	GMP; Precursor Z	C00144; C18239	C10H14N5O8P	-H(-)	100
200	363.035	49841.8	0.817112	Xanthosine 5'-phosphate	C00655	C10H13N4O9P	-H(-)	100
201	363.217	34318.9	0.947057	Tetrahydrocortisone	C05470	C21H32O5	-H(-)	100
202	367.249	86314	0.944006	Cortol	C05482	C21H36O5	-H(-)	100
203	375.13	135455	0.965742	Riboflavin	C00255	C17H20N4O6	-H(-)	85
204	379.013	34333.5	0.933592	6-Thioxanthine 5'-monophosphate	C16618	C10H13N4O8PS	-H(-)	100
205	388.066	14621.5	0.786215	Acetyl adenylate	C05993	C12H16N5O8P	-H(-)	100
206	402.011	25229.7	0.602976	CDP	C00112	C9H15N3O11P2	-H(-)	100
207	402.995	60899.4	0.718514	UDP	C00015	C9H14N2O12P2	-H(-)	100
208	421.077	309780	0.902883	alpha,alpha'-Trehalose 6-phosphate; alpha-Maltose 1-phosphate	C00689; C20237	C12H23O14P	-H(-)	36
209	426.022	188543	0.20881	ADP; Adenosine 3',5'-bisphosphate; dGDP	C00008; C00054; C00361	C10H15N5O10P2	-H(-)	100
210	442.017	16836	0.694759	GDP	C00035	C10H15N5O11P2	-H(-)	100
211	455.156	459068	0.963917	5,10-Methenyltetrahydrofolate	C00445	C20H22N7O6	-H(-)	100
212	472.159	48772.4	0.95456	10-Formyltetrahydrofolate; Folinic acid	C00234; C03479	C20H23N7O7	-H(-)	100
213	482.962	20568.8	0.466776	UTP	C00075	C9H15N2O15P3	-H(-)	100
214	490.976	19090.8	0.296218	dITP	C01345	C10H15N4O13P3	-H(-)	33
215	535.037	57939.6	0.938059	UDP-D-xylose	C00190	C14H22N2O16P2	-H(-)	100
216	561.252	38143.4	0.946949	Protoporphyrin	C02191	C34H34N4O4	-H(-)	100
217	565.048	285982	0.823373	UDP-glucose; UDP-alpha-D-galactose	C00029; C00052	C15H24N2O17P2	-H(-)	100
218	579.026	41702.4	0.507018	UDP-glucuronate; UDP-D-galacturonate	C00167; C00617	C15H22N2O18P2	-H(-)	100
219	588.075	9835.95	0.891732	GDP-L-fucose; ADP-glucose	C00325; C00498	C16H25N5O15P2	-H(-)	100
220	604.069	21140.6	0.880597	GDP-mannose	C00096	C16H25N5O16P2	-H(-)	100
221	606.075	63114.9	0.829784	UDP-N-acetyl-alpha-D-glucosamine; UDP-N-acetyl-D-mannosamine	C00043; C01170	C17H27N3O17P2	-H(-)	100
222	702.248	20961.6	0.948256	Tetrahydropteroyltri-L-glutamate	C04144	C29H37N9O12	-H(-)	100
223	716.264	13856.9	0.95865	5-Methyltetrahydropteroyltri-L-glutamate	C04489	C30H39N9O12	-H(-)	100
224	990.286	18472.6	0.526594	3-Oxotetradecanoyl-CoA	C05261	C35H60N7O18P3S	-H(-)	100

## Sheet: annotation
ionIdx	ionMz	ionQualTIC	ionAverageInt	mz difference	formula	ion	score	name	synonym	id
1	55.0189	0.702985	8613.46	6.71666e-05	C3H4O	-H(-)	100	2-Propyn-1-ol	1-Hydroxy-2-propyne; 1-Propyn-3-ol; 1-Propyn-3-yl alcohol; 2-Propyn-1-ol; 2-Propynol; 2-Propynyl alcohol; 3-Hydroxy-1-propyne; 3-Propynol; Ethynylcarbinol; NA 1986; Prop-2-in-1-ol; Prop-2-yn-1-ol; Prop-2-yne-1-ol; Propargyl alcohol; Propynyl alcohol	C05986
2	57.0346	0.14633	102147	-2.77059e-05	C3H6O	-H(-)	100	Acetone	2-Propanone; Acetone; Dimethyl ketone	C00207
3	59.0134	0.930246	187007	0.000421843	C2H4O2	-H(-)	100	Acetate	Acetate; Acetic acid; Ethanoic acid	C00033
3	59.0134	0.930246	187007	0.000421843	C2H4O2	-H(-)	100	Glycolaldehyde	Glycolaldehyde; Hydroxyacetaldehyde	C00266
4	70.03	0.868278	12189.7	-0.000131816	C3H5NO	-H(-)	100	Acrylamide	2-Propenamide; Acrylamide	C01659
5	71.014	0.91312	316606	-0.000121691	C3H4O2	-H(-)	100	Acrylic acid	2-Propenoic acid; Acrylate; Acrylic acid; Propenoate; Vinylformic acid	C00511
5	71.014	0.91312	316606	-0.000121691	C3H4O2	-H(-)	100	Methylglyoxal	2-Ketopropionaldehyde; 2-Oxopropanal; Methylglyoxal; Pyruvaldehyde; Pyruvic aldehyde	C00546
6	72.0093	0.837352	15434.9	-0.000177852	C2H3NO2	-H(-)	100	Iminoglycine	2-Iminoacetate; Iminoacetic acid; Iminoglycine	C15809
7	72.9934	0.856445	84966	-0.000238989	C2H2O3	-H(-)	100	Glyoxylate	Glyoxalate; Glyoxylate; Glyoxylic acid	C00048
8	73.0294	0.885353	79452.5	0.000139189	C3H6O2	-H(-)	100	Propanoate	Propanoate; Propanoic acid; Propionate; Propionic acid	C00163
8	73.0294	0.885353	79452.5	0.000139189	C3H6O2	-H(-)	100	(S)-Lactaldehyde	(S)-Lactaldehyde; L-2-Hydroxypropionaldehyde; L-Lactaldehyde	C00424
8	73.0294	0.885353	79452.5	0.000139189	C3H6O2	-H(-)	100	(R)-Lactaldehyde	(R)-Lactaldehyde; D-2-Hydroxypropionaldehyde; D-Lactaldehyde	C00937
8	73.0294	0.885353	79452.5	0.000139189	C3H6O2	-H(-)	100	Methyl acetate	Devoton; Methyl acetate; Tereton	C17530
9	74.0248	0.79954	9673.05	-1.3872e-05	C2H5NO2	-H(-)	100	Glycine	Aminoacetic acid; Gly; Glycine	C00037
10	75.0089	0.852208	24429.1	-9.68588e-05	C2H4O3	-H(-)	100	Glycolate	Glycolate; Glycolic acid; Hydroxyacetic acid	C00160
11	87.0087	0.943201	178263	3.80743e-05	C3H4O3	-H(-)	100	Pyruvate	2-Oxopropanoate; 2-Oxopropanoic acid; Pyroracemic acid; Pyruvate; Pyruvic acid	C00022
11	87.0087	0.943201	178263	3.80743e-05	C3H4O3	-H(-)	100	3-Oxopropanoate	3-Oxopropanoate; Malonate semialdehyde	C00222
12	87.0451	0.780119	11092	6.04668e-05	C4H8O2	-H(-)	100	Butanoic acid	Butanoate; Butanoic acid; Butyrate; Butyric acid	C00246
13	88.9881	0.814767	54538	-2.37544e-05	C2H2O4	-H(-)	100	Oxalate	Ethanedioic acid; Oxalate; Oxalic acid	C00209
14	89.0244	0.935549	151979	2.85565e-05	C3H6O3	-H(-)	100	Glycerone	1,3-Dihydroxy-2-propanone; 1,3-Dihydroxyacetone; 1,3-Dihydroxypropan-2-one; Dihydroxyacetone; Glycerone	C00184
14	89.0244	0.935549	151979	2.85565e-05	C3H6O3	-H(-)	100	(S)-Lactate	(S)-Lactate; L-Lactate; L-Lactic acid	C00186
14	89.0244	0.935549	151979	2.85565e-05	C3H6O3	-H(-)	100	(R)-Lactate	(R)-Lactate; D-2-Hydroxypropanoic acid; D-2-Hydroxypropionic acid; D-Lactate; D-Lactic acid	C00256
14	89.0244	0.935549	151979	2.85565e-05	C3H6O3	-H(-)	100	D-Glyceraldehyde	D-Glyceraldehyde	C00577
15	91.0399	0.876085	18539.8	0.000115809	C3H8O3	-H(-)	100	Glycerol	1,2,3-Propanetriol; 1,2,3-Trihydroxypropane; Glycerin; Glycerol	C00116
16	93.0344	0.750281	31255.3	0.000143822	C6H6O	-H(-)	100	Phenol	Benzenol; Hydroxybenzene; Phenic acid; Phenol; Phenylic acid	C00146
17	95.0139	0.48157	23751.5	-4.63574e-05	C5H4O2	-H(-)	100	Protoanemonin	4-Methylenebut-2-en-4-olide; Protoanemonin; cis-4-Methylenebut-2-en-4-olide	C07090
17	95.0139	0.48157	23751.5	-4.63574e-05	C5H4O2	-H(-)	100	Furfural	2-Furaldehyde; Furfural	C14279
18	100.04	0.737587	6987.22	0.000278096	C4H7NO2	-H(-)	100	1-Aminocyclopropane-1-carboxylate	1-Aminocyclopropane-1-carboxylate; 1-Aminocyclopropane-1-carboxylic acid	C01234
18	100.04	0.737587	6987.22	0.000278096	C4H7NO2	-H(-)	100	2-Aminobut-2-enoate	(2Z)-2-Aminobut-2-enoic acid; 2-Aminobut-2-enoate; 2-Ammoniobut-2-enoate	C17234
19	101.025	0.92562	173118	-0.000298413	C4H6O3	-H(-)	100	2-Oxobutanoate	2-Ketobutyric acid; 2-Oxobutanoate; 2-Oxobutanoic acid; 2-Oxobutyrate; 2-Oxobutyric acid; alpha-Ketobutyrate; alpha-Ketobutyric acid	C00109
19	101.025	0.92562	173118	-0.000298413	C4H6O3	-H(-)	100	Acetoacetate	3-Oxobutanoic acid; Acetoacetate; Acetoacetic acid; beta-Ketobutyric acid	C00164
19	101.025	0.92562	173118	-0.000298413	C4H6O3	-H(-)	100	Succinate semialdehyde	4-Oxobutanoate; Succinate semialdehyde; Succinic semialdehyde	C00232
19	101.025	0.92562	173118	-0.000298413	C4H6O3	-H(-)	100	(S)-Methylmalonate semialdehyde	(S)-Methylmalonate semialdehyde	C06002
20	102.056	0.892983	22791.4	-0.000209143	C4H9NO2	-H(-)	100	4-Aminobutanoate	4-Aminobutanoate; 4-Aminobutanoic acid; 4-Aminobutyrate; 4-Aminobutyric acid; GABA; gamma-Aminobutyric acid	C00334
20	102.056	0.892983	22791.4	-0.000209143	C4H9NO2	-H(-)	100	L-3-Amino-isobutanoate	(S)-3-Amino-2-methylpropanoate; (S)-3-Amino-isobutanoate; (S)-3-Amino-isobutyrate; L-3-Amino-isobutanoate; L-3-Amino-isobutyrate	C03284
21	103.003	0.88243	167405	0.000473558	C3H4O4	-H(-)	100	Hydroxypyruvate	3-Hydroxypyruvate; 3-Hydroxypyruvic acid; Hydroxypyruvate; Hydroxypyruvic acid	C00168
21	103.003	0.88243	167405	0.000473558	C3H4O4	-H(-)	100	Malonate	Malonate; Malonic acid; Propanedioic acid	C00383
21	103.003	0.88243	167405	0.000473558	C3H4O4	-H(-)	100	2-Hydroxy-3-oxopropanoate	2-Hydroxy-3-oxopropanoate; Tartronate semialdehyde	C01146
22	103.016	0.864213	14647.6	-0.000683202	C2H4N2O3	-H(-)	100	Urea-1-carboxylate	Allophanate; Allophanic acid; Urea-1-carboxylate	C01010
23	103.04	0.82156	17458.1	0.00017006	C4H8O3	-H(-)	100	(R)-3-Hydroxybutanoate	(R)-3-Hydroxybutanoate; (R)-3-Hydroxybutanoic acid; (R)-3-Hydroxybutyric acid; D-beta-Hydroxybutyric acid	C01089
23	103.04	0.82156	17458.1	0.00017006	C4H8O3	-H(-)	100	(S)-3-Hydroxyisobutyrate	(S)-3-Hydroxyisobutyrate	C06001
24	104.035	0.83058	12404.6	7.72177e-05	C3H7NO3	-H(-)	100	L-Serine	L-2-Amino-3-hydroxypropionic acid; L-3-Hydroxy-alanine; L-Serine; Serine	C00065
24	104.035	0.83058	12404.6	7.72177e-05	C3H7NO3	-H(-)	100	D-Serine	D-Serine	C00740
25	109.03	0.790789	12512	-8.00703e-05	C6H6O2	-H(-)	100	Catechol	1,2-Benzenediol; 1,2-Dihydroxybenzene; Brenzcatechin; Catechol; Pyrocatechol; o-Benzenediol	C00090
25	109.03	0.790789	12512	-8.00703e-05	C6H6O2	-H(-)	100	Resorcinol	1,3-Benzenediol; 1,3-Dihydroxybenzene; Resorcin; Resorcinol; m-Hydroquinone	C01751
26	109.041	0.821146	7082.5	-0.000413361	C5H6N2O	-H(-)	100	Imidazole-4-acetaldehyde	Imidazole acetaldehyde; Imidazole-4-acetaldehyde	C05130
27	111.009	0.747757	209407	2.14984e-05	C5H4O3	-H(-)	100	2-Furoate	2-Furancarboxylic acid; 2-Furoate; 2-Furoic acid; Pyromucic acid	C01546
28	111.021	0.843982	28117	-0.00062344	C4H4N2O2	-H(-)	100	Uracil	Uracil	C00106
29	113.025	0.826169	277101	-0.000112266	C5H6O3	-H(-)	100	cis-Acetylacrylate	cis-Acetylacrylate	C07091
30	113.036	0.869279	306765	2.36187e-05	C4H6N2O2	-H(-)	100	5,6-Dihydrouracil	2,4-Dioxotetrahydropyrimidine; 5,6-Dihydro-2,4-dihydroxypyrimidine; 5,6-Dihydrouracil; Dihydro-2,4(1H,3H)-pyrimidinedione; Dihydrouracil; Dihydrouracile; Hydrouracil	C00429
30	113.036	0.869279	306765	2.36187e-05	C4H6N2O2	-H(-)	100	3-Cyano-L-alanine	3-Cyano-L-alanine; L-3-Cyanoalanine; L-beta-Cyanoalanine	C02512
30	113.036	0.869279	306765	2.36187e-05	C4H6N2O2	-H(-)	100	N-Methylhydantoin	N-Methylhydantoin; N-Methylimidazolidine-2,4-dione	C02565
31	114.056	0.869012	43097.4	0.000352632	C5H9NO2	-H(-)	100	L-Proline	2-Pyrrolidinecarboxylic acid; L-Proline	C00148
32	115.004	0.932524	1.77337e+06	0.000125541	C4H4O4	-H(-)	100	Fumarate	Fumarate; Fumaric acid; trans-Butenedioic acid	C00122
32	115.004	0.932524	1.77337e+06	0.000125541	C4H4O4	-H(-)	100	Maleic acid	Maleate; Maleic acid; cis-Butenedioic acid	C01384
33	116.035	0.719024	15723.1	0.000288503	C4H7NO3	-H(-)	100	L-Aspartate 4-semialdehyde	Aspartate beta-semialdehyde; L-Aspartate 4-semialdehyde; L-Aspartic 4-semialdehyde	C00441
34	116.072	0.86774	204438	0.000192002	C5H11NO2	-H(-)	100	L-Valine	2-Amino-3-methylbutyric acid; L-Valine	C00183
35	117.019	0.850226	302736	2.79442e-05	C4H6O4	-H(-)	100	Succinate	Butanedionic acid; Ethylenesuccinic acid; Succinate; Succinic acid	C00042
35	117.019	0.850226	302736	2.79442e-05	C4H6O4	-H(-)	100	Methylmalonate	Methylmalonate; Methylmalonic acid	C02170
36	118.051	0.855298	46836.2	0.000115558	C4H9NO3	-H(-)	100	L-Threonine	2-Amino-3-hydroxybutyric acid; L-Threonine	C00188
36	118.051	0.855298	46836.2	0.000115558	C4H9NO3	-H(-)	100	L-Homoserine	2-Amino-4-hydroxybutyric acid; L-Homoserine	C00263
36	118.051	0.855298	46836.2	0.000115558	C4H9NO3	-H(-)	100	L-Allothreonine	L-Allothreonine; L-allo-Threonine	C05519
37	118.98	0.270745	54735.1	0.000365748	C3H4O3S	-H(-)	100	Mercaptopyruvate	3-Mercaptopyruvate; 3-Mercaptopyruvic acid; Mercaptopyruvate	C00957
38	119.05	0.876792	255312	0.000294105	C8H8O	-H(-)	100	Phenylacetaldehyde	Phenylacetaldehyde; alpha-Tolualdehyde	C00601
38	119.05	0.876792	255312	0.000294105	C8H8O	-H(-)	100	p-Tolualdehyde	4-Methylbenzaldehyde; 4-Toluylaldehyde; p-Formyltoluene; p-Methylbenzaldehyde; p-Tolualdehyde	C06758
38	119.05	0.876792	255312	0.000294105	C8H8O	-H(-)	100	3-Methylbenzaldehyde	3-Methylbenzaldehyde; m-Tolualdehyde	C07209
38	119.05	0.876792	255312	0.000294105	C8H8O	-H(-)	100	2-Methylbenzaldehyde	2-Formyltoluene; 2-Methylbenzaldehyde; o-Tolualdehyde; o-Toluic aldehyde	C07214
39	120.045	0.754627	21176.9	9.80675e-05	C7H7NO	-H(-)	100	Benzamide	Benzamide	C09815
40	121.03	0.907023	705971	-0.000174043	C7H6O2	-H(-)	100	Benzoate	Benzenecarboxylic acid; Benzoate; Benzoic acid; Dracylic acid; Phenylformic acid	C00180
40	121.03	0.907023	705971	-0.000174043	C7H6O2	-H(-)	100	4-Hydroxybenzaldehyde	4-Hydroxybenzaldehyde; p-Hydroxybenzaldehyde	C00633
40	121.03	0.907023	705971	-0.000174043	C7H6O2	-H(-)	100	3-Hydroxybenzaldehyde	3-Hydroxybenzaldehyde	C03067
41	121.041	0.730415	91514.6	-0.000746821	C6H6N2O	-H(-)	100	Nicotinamide	Niacinamide; Nicotinamide; Nicotinic acid amide; Vitamin PP	C00153
42	125.024	0.77025	1.19959e+06	0.000355292	C6H6O3	-H(-)	100	Benzene-1,2,4-triol	1,2,4-Benzenetriol; 1,2,4-Trihydroxybenzene; Benzene-1,2,4-triol; Hydroxyhydroquinone; Hydroxyquinol	C02814
42	125.024	0.77025	1.19959e+06	0.000355292	C6H6O3	-H(-)	100	5-Hydroxymethyl-2-furaldehyde	5-Hydroxymethyl-2-furaldehyde; 5-Hydroxymethylfurfural; HMF	C11101
43	125.036	0.439657	131215	-2.49951e-05	C5H6N2O2	-H(-)	100	Thymine	5-Methyluracil; Thymine	C00178
43	125.036	0.439657	131215	-2.49951e-05	C5H6N2O2	-H(-)	100	Imidazole-4-acetate	4-Imidazoleacetate; Imidazole-4-acetate; Imidazoleacetic acid	C02835
44	126.092	0.809561	9434.02	0.000299295	C7H13NO	-H(-)	100	N-Cyclohexylformamide	N-Cyclohexylformamide	C11519
45	127.051	0.917099	96887.4	-9.82363e-05	C5H8N2O2	-H(-)	100	5,6-Dihydrothymine	5,6-Dihydro-5-methyluracil; 5,6-Dihydrothymine; Dihydrothymine	C00906
45	127.051	0.917099	96887.4	-9.82363e-05	C5H8N2O2	-H(-)	100	gamma-Amino-gamma-cyanobutanoate	4-Amino-4-cyanobutanoic acid; gamma-Amino-gamma-cyanobutanoate	C05715
46	128.036	0.915812	443455	-0.000243651	C5H7NO3	-H(-)	100	L-1-Pyrroline-3-hydroxy-5-carboxylate	(3R,5S)-1-Pyrroline-3-hydroxy-5-carboxylate; 3-Hydroxy-L-1-pyrroline-5-carboxylate; L-1-Pyrroline-3-hydroxy-5-carboxylate	C04281
47	128.071	0.896044	66346.4	0.000576029	C6H11NO2	-H(-)	100	N4-Acetylaminobutanal	4-Acetamidobutanal; N4-Acetylaminobutanal	C05936
48	129.019	0.953962	494244	0.000152512	C5H6O4	-H(-)	100	2,5-Dioxopentanoate	2,5-Dioxopentanoate; 2-Oxoglutarate semialdehyde	C00433
48	129.019	0.953962	494244	0.000152512	C5H6O4	-H(-)	100	Itaconate	Itaconate; Itaconic acid; Methylenesuccinic acid	C00490
48	129.019	0.953962	494244	0.000152512	C5H6O4	-H(-)	100	2-Methylmaleate	2-Methylmaleate; Citraconate; Citraconic acid; Methylmaleic acid	C02226
49	129.055	0.796088	136222	0.000424943	C6H10O3	-H(-)	100	4-Methyl-2-oxopentanoate	2-Oxoisocaproate; 4-Methyl-2-oxopentanoate	C00233
49	129.055	0.796088	136222	0.000424943	C6H10O3	-H(-)	100	(S)-3-Methyl-2-oxopentanoic acid	(3S)-3-Methyl-2-oxopentanoate; (3S)-3-Methyl-2-oxopentanoic acid; (S)-3-Methyl-2-oxopentanoate; (S)-3-Methyl-2-oxopentanoic acid	C00671
49	129.055	0.796088	136222	0.000424943	C6H10O3	-H(-)	100	1-Oxa-2-oxo-3-hydroxycycloheptane	1-Oxa-2-oxo-3-hydroxycycloheptane	C12314
50	129.103	0.798301	21128.9	7.07505e-05	C6H14N2O	-H(-)	100	N-Acetylputrescine	N-Acetylputrescine	C02714
51	130.051	0.90719	78226.8	0.000261535	C5H9NO3	-H(-)	100	5-Aminolevulinate	5-Amino-4-oxopentanoate; 5-Amino-4-oxovaleric acid; 5-Aminolevulinate	C00430
51	130.051	0.90719	78226.8	0.000261535	C5H9NO3	-H(-)	100	5-Amino-2-oxopentanoic acid	2-Oxo-5-amino-pentanoate; 2-Oxo-5-aminopentanoate; 2-Oxo-5-aminovalerate; 5-Amino-2-oxopentanoate; 5-Amino-2-oxopentanoic acid; alpha-Keto-delta-aminopentanoate	C01110
51	130.051	0.90719	78226.8	0.000261535	C5H9NO3	-H(-)	100	Hydroxyproline	Hydroxyproline; L-Hydroxyproline; trans-4-Hydroxy-L-proline	C01157
51	130.051	0.90719	78226.8	0.000261535	C5H9NO3	-H(-)	100	L-Glutamate 5-semialdehyde	L-Glutamate 5-semialdehyde; L-Glutamate gamma-semialdehyde	C01165
51	130.051	0.90719	78226.8	0.000261535	C5H9NO3	-H(-)	100	(S)-4-Amino-5-oxopentanoate	(S)-4-Amino-5-oxopentanoate; L-Glutamate 1-semialdehyde	C03741
52	130.087	0.9056	514265	0.000410198	C6H13NO2	-H(-)	100	L-Leucine	(2S)-alpha-2-Amino-4-methylvaleric acid; (2S)-alpha-Leucine; 2-Amino-4-methylvaleric acid; L-Leucine	C00123
52	130.087	0.9056	514265	0.000410198	C6H13NO2	-H(-)	100	L-Isoleucine	2-Amino-3-methylvaleric acid; L-Isoleucine	C00407
53	131.046	0.927626	1.82006e+06	-7.8445e-05	C4H8N2O3	-H(-)	100	L-Asparagine	2-Aminosuccinamic acid; L-Asparagine	C00152
53	131.046	0.927626	1.82006e+06	-7.8445e-05	C4H8N2O3	-H(-)	100	N-Carbamoylsarcosine	N-Carbamoylsarcosine	C01043
53	131.046	0.927626	1.82006e+06	-7.8445e-05	C4H8N2O3	-H(-)	100	3-Ureidopropionate	3-Ureidopropanoate; 3-Ureidopropionate; N-Carbamoyl-beta-alanine; beta-Ureidopropionic acid	C02642
54	132.042	0.959935	224255	-0.000239298	C3H7N3O3	-H(-)	100	(S)-Ureidoglycine	(S)-Ureidoglycine	C02091
55	133.015	0.935869	1.59888e+07	-0.000324197	C4H6O5	-H(-)	100	(S)-Malate	(S)-Malate; L-2-Hydroxybutanedioic acid; L-Apple acid; L-Malate; L-Malic acid; Malate; Malic acid	C00149
55	133.015	0.935869	1.59888e+07	-0.000324197	C4H6O5	-H(-)	100	(R)-Malate	(R)-Malate; D-Malate; D-Malic acid	C00497
56	135.045	0.943948	365968	0.00055915	C8H8O2	-H(-)	100	Toluate	4-Methylbenzoic acid; Crithminic acid; Toluate; Toluenecarboxylic acid; p-Toluate; p-Toluic acid	C01454
56	135.045	0.943948	365968	0.00055915	C8H8O2	-H(-)	100	4-Hydroxyphenylacetaldehyde	2-(4-Hydroxyphenyl)acetaldehyde; 4-Hydroxyphenylacetaldehyde	C03765
56	135.045	0.943948	365968	0.00055915	C8H8O2	-H(-)	100	3-Vinylcatechol	3-Vinylcatechol	C07085
56	135.045	0.943948	365968	0.00055915	C8H8O2	-H(-)	100	Phenylacetic acid	Benzeneacetic acid; Benzylformic acid; Phenylacetate; Phenylacetic acid	C07086
56	135.045	0.943948	365968	0.00055915	C8H8O2	-H(-)	100	m-Methylbenzoate	beta-Bethylbenzoic acid; m-Methylbenzoate; m-Toluic Acid; m-Toluylic acid	C07211
56	135.045	0.943948	365968	0.00055915	C8H8O2	-H(-)	100	o-Toluate	2-Methylbenzoic acid; o-Methylbenzoate; o-Toluate; o-Toluic Acid	C07215
56	135.045	0.943948	365968	0.00055915	C8H8O2	-H(-)	100	4'-Hydroxyacetophenone	(4-Hydroxyphenyl)ethan-1-one; 4'-Hydroxyacetophenone	C10700
57	136.04	0.823106	127642	-8.87726e-05	C7H7NO2	-H(-)	100	Anthranilate	2-Aminobenzoate; Anthranilate; Anthranilic acid; Vitamin L1; o-Aminobenzoic acid	C00108
57	136.04	0.823106	127642	-8.87726e-05	C7H7NO2	-H(-)	100	4-Aminobenzoate	4-Aminobenzoate; 4-Aminobenzoic acid; ABEE; p-Aminobenzoate	C00568
58	136.076	0.693815	17207.6	0.000838094	C8H11NO	-H(-)	100	Tyramine	2-(p-Hydroxyphenyl)ethylamine; Tyramine	C00483
59	138.019	0.208659	172031	0.000392771	C6H5NO3	-H(-)	100	4-Nitrophenol	4-Hydroxynitrobenzene; 4-Nitrophenol; Niphen; PNP; p-Nitrophenol	C00870
59	138.019	0.208659	172031	0.000392771	C6H5NO3	-H(-)	100	6-Hydroxynicotinate	6-Hydroxynicotinate; 6-Hydroxynicotinic acid	C01020
60	140.012	0.375298	48414.5	0.000187665	C2H8NO4P	-H(-)	100	Ethanolamine phosphate	Ethanolamine phosphate; O-Phosphoethanolamine; O-Phosphorylethanolamine; Phosphoethanolamine	C00346
61	140.083	0.0877571	55952.6	0.000162517	C6H11N3O	-H(-)	100	L-Histidinol	L-Histidinol	C00860
62	141.019	0.785311	729668	0.000266263	C6H6O4	-H(-)	100	2-Hydroxymuconate semialdehyde	2-Hydroxymuconate semialdehyde; 2-Hydroxymuconate-6-semialdehyde; 2-Hydroxymuconic semialdehyde	C00682
62	141.019	0.785311	729668	0.000266263	C6H6O4	-H(-)	100	cis,cis-Muconate	cis,cis-2,4-Hexadienedioic acid; cis,cis-Hexadienedioate; cis,cis-Muconate	C02480
62	141.019	0.785311	729668	0.000266263	C6H6O4	-H(-)	100	2-Oxo-2,3-dihydrofuran-5-acetate	2-Oxo-2,3-dihydrofuran-5-acetate; 3-Oxoadipate enol-lactone; 4,5-Dihydro-5-oxofuran-2-acetate; 5-Oxo-4,5-dihydrofuran-2-acetate	C03586
62	141.019	0.785311	729668	0.000266263	C6H6O4	-H(-)	100	(S)-5-Oxo-2,5-dihydrofuran-2-acetate	(+)-Muconolactone; (S)-5-Oxo-2,5-dihydrofuran-2-acetate	C14610
62	141.019	0.785311	729668	0.000266263	C6H6O4	-H(-)	100	5-Hydroxymethyl-2-furoate	5-Hydroxymethyl-2-furoate; 5-Hydroxymethyl-2-furoic acid	C20448
63	141.068	0.654377	23399	-0.000629496	C6H10N2O2	-H(-)	100	Ectoine	Ectoine; L-Ectoine	C06231
64	144.067	0.900231	141789	-4.28664e-05	C6H11NO3	-H(-)	100	4-Acetamidobutanoate	4-Acetamidobutanoate; N4-Acetylaminobutanoate	C02946
64	144.067	0.900231	141789	-4.28664e-05	C6H11NO3	-H(-)	100	6-Amino-2-oxohexanoate	2-Oxo-6-aminocaproate; 6-Amino-2-oxohexanoate	C03239
65	145.014	0.953965	497959	-7.48884e-05	C5H6O5	-H(-)	100	2-Oxoglutarate	2-Ketoglutaric acid; 2-Oxoglutarate; Oxoglutaric acid; alpha-Ketoglutaric acid	C00026
66	145.05	0.82577	122024	0.000268463	C6H10O4	-H(-)	100	2-Dehydropantoate	2-Dehydropantoate	C00966
66	145.05	0.82577	122024	0.000268463	C6H10O4	-H(-)	100	(S)-2-Aceto-2-hydroxybutanoate	(S)-2-Aceto-2-hydroxybutanoate; (S)-2-Hydroxy-2-ethyl-3-oxobutanoate	C06006
66	145.05	0.82577	122024	0.000268463	C6H10O4	-H(-)	100	(R)-3-Hydroxy-3-methyl-2-oxopentanoate	(R)-3-Hydroxy-3-methyl-2-oxopentanoate	C14463
66	145.05	0.82577	122024	0.000268463	C6H10O4	-H(-)	100	3-Hydroxy-5-oxohexanoate	3-Hydroxy-5-oxohexanoate	C16272
67	145.062	0.948687	656559	-6.05141e-05	C5H10N2O3	-H(-)	100	L-Glutamine	L-2-Aminoglutaramic acid; L-Glutamine	C00064
67	145.062	0.948687	656559	-6.05141e-05	C5H10N2O3	-H(-)	100	D-Glutamine	D-2-Aminoglutaramic acid; D-Glutamine	C00819
67	145.062	0.948687	656559	-6.05141e-05	C5H10N2O3	-H(-)	100	3-Ureidoisobutyrate	3-Ureidoisobutyrate	C05100
68	146.046	0.960034	1.22222e+06	-0.000177401	C5H9NO4	-H(-)	100	L-Glutamate	Glutamate; L-Glutamate; L-Glutamic acid; L-Glutaminic acid	C00025
68	146.046	0.960034	1.22222e+06	-0.000177401	C5H9NO4	-H(-)	100	D-Glutamate	D-2-Aminoglutaric acid; D-Glutamate; D-Glutamic acid; D-Glutaminic acid	C00217
68	146.046	0.960034	1.22222e+06	-0.000177401	C5H9NO4	-H(-)	100	Glutamate	2-Aminoglutaric acid; Glutamate; Glutaminic acid	C00302
68	146.046	0.960034	1.22222e+06	-0.000177401	C5H9NO4	-H(-)	100	O-Acetyl-L-serine	O-Acetyl-L-serine; O3-Acetyl-L-serine	C00979
68	146.046	0.960034	1.22222e+06	-0.000177401	C5H9NO4	-H(-)	100	L-4-Hydroxyglutamate semialdehyde	L-4-Hydroxyglutamate semialdehyde	C05938
69	147.03	0.832446	954467	0.000303746	C5H8O5	-H(-)	100	(R)-2-Methylmalate	(2R)-2-Hydroxy-2-methylbutanedioate; (R)-2-Methylmalate; (R)-2-Methylmalic acid; (R)-Citramalate; (R)-Citramalic acid; (R)-alpha-Hydroxypyrotartaric acid; D-Citramalate; D-Citramalic acid; D-alpha-Hydroxypyrotartaric acid	C02612
69	147.03	0.832446	954467	0.000303746	C5H8O5	-H(-)	100	2-Hydroxyglutarate	2-Hydroxyglutarate; alpha-Hydroxyglutarate	C02630
69	147.03	0.832446	954467	0.000303746	C5H8O5	-H(-)	100	D-erythro-3-Methylmalate	(2R,3S)-3-Methylmalate; D-erythro-3-Methylmalate	C06032
70	147.045	0.954369	389851	0.000394838	C9H8O2	-H(-)	100	trans-Cinnamate	(E)-Cinnamate; trans-Cinnamate; trans-Cinnamic acid	C00423
71	148.042	0.815824	42282.1	-0.00129018	C8H7NO2	-H(-)	63	(S)-4-Hydroxymandelonitrile	(S)-4-Hydroxymandelonitrile	C03742
71	148.042	0.815824	42282.1	-0.000147881	C5H7NO3	.F(-)	40	L-1-Pyrroline-3-hydroxy-5-carboxylate	(3R,5S)-1-Pyrroline-3-hydroxy-5-carboxylate; 3-Hydroxy-L-1-pyrroline-5-carboxylate; L-1-Pyrroline-3-hydroxy-5-carboxylate	C04281
72	149.009	0.670092	733789	0.000424248	C4H6O6	-H(-)	100	meso-Tartaric acid	meso-Tartaric acid; meso-Tartrate	C00552
72	149.009	0.670092	733789	0.000424248	C4H6O6	-H(-)	100	(R,R)-Tartaric acid	(+)-Tartaric acid; (2R,3R)-Tartaric acid; (R,R)-Tartaric acid; (R,R)-Tartrate; 2,3-Dihydroxybutanedioic acid; L-Tartaric acid; Tartaric acid; Tartrate	C00898
73	149.046	0.889881	5.31585e+06	-0.000373062	C5H10O5	-H(-)	100	D-Ribose	D-Ribose	C00121
73	149.046	0.889881	5.31585e+06	-0.000373062	C5H10O5	-H(-)	100	D-Xylose	D-Xylose; Wood sugar	C00181
73	149.046	0.889881	5.31585e+06	-0.000373062	C5H10O5	-H(-)	100	D-Ribulose	D-Arabinoketose; D-Arabinulose; D-Riboketose; D-Ribulose; D-erythro-2-Pentulose	C00309
73	149.046	0.889881	5.31585e+06	-0.000373062	C5H10O5	-H(-)	100	D-Xylulose	D-Lyxulose; D-Xylulose; D-threo-Pentulose	C00310
74	151.026	0.900723	51839.6	9.90963e-05	C5H4N4O2	-H(-)	100	Xanthine	Xanthine	C00385
75	151.04	0.855929	179651	0.000300052	C8H8O3	-H(-)	100	4-Hydroxyphenylacetate	4-Hydroxyphenylacetate; 4-Hydroxyphenylacetic acid	C00642
75	151.04	0.855929	179651	0.000300052	C8H8O3	-H(-)	100	(R)-Mandelate	(R)-2-Hydroxy-2-phenylacetate; (R)-2-Hydroxy-2-phenylacetic acid; (R)-Mandelate; (R)-Mandelic acid	C01983
75	151.04	0.855929	179651	0.000300052	C8H8O3	-H(-)	100	(S)-Mandelate	(S)-2-Hydroxy-2-phenylacetate; (S)-2-Hydroxy-2-phenylacetic acid; (S)-Mandelate; (S)-Mandelic acid	C01984
75	151.04	0.855929	179651	0.000300052	C8H8O3	-H(-)	100	3,4-Dihydroxyphenylacetaldehyde	3,4-Dihydroxyphenylacetaldehyde; Protocatechuatealdehyde	C04043
75	151.04	0.855929	179651	0.000300052	C8H8O3	-H(-)	100	3-Hydroxyphenylacetate	3-Hydroxyphenylacetate; 3-Hydroxyphenylacetic acid	C05593
75	151.04	0.855929	179651	0.000300052	C8H8O3	-H(-)	100	2-Hydroxyphenylacetate	2-Hydroxyphenylacetate; 2-Hydroxyphenylacetic acid	C05852
75	151.04	0.855929	179651	0.000300052	C8H8O3	-H(-)	100	4-Hydroxyphenyl acetate	4-Hydroxyphenyl acetate	C13636
75	151.04	0.855929	179651	0.000300052	C8H8O3	-H(-)	100	3-Methylsalicylate	3-Methylsalicylate	C14088
75	151.04	0.855929	179651	0.000300052	C8H8O3	-H(-)	100	4-Methylsalicylate	2-Hydroxy-4-methylbenzoic acid; 4-Methylsalicylate; m-Cresotic acid	C14103
76	151.061	0.894919	91786	-0.000185826	C5H12O5	-H(-)	100	Ribitol	Adonitol; Ribitol	C00474
77	151.112	0.654395	22478.9	0.000567928	C10H16O	-H(-)	100	Limonene-1,2-epoxide	(4R)-Limonene-1,2-epoxide; Limonene oxide; Limonene-1,2-epoxide	C07271
77	151.112	0.654395	22478.9	0.000567928	C10H16O	-H(-)	100	Myrtenol	2-Pinen-10-ol; Myrtenol	C11938
77	151.112	0.654395	22478.9	0.000567928	C10H16O	-H(-)	100	Pinocarveol	Pinocarveol	C11941
77	151.112	0.654395	22478.9	0.000567928	C10H16O	-H(-)	100	(4S)-Limonene-1,2-epoxide	(4S)-Limonene-1,2-epoxide	C19081
78	152.034	0.889921	69941.5	0.00137017	C7H7NO3	-H(-)	55	3-Hydroxyanthranilate	3-Hydroxyanthranilate; 3-Hydroxyanthranilic acid	C00632
79	152.071	0.861687	31764.1	0.00035652	C8H11NO2	-H(-)	100	Dopamine	2-(3,4-Dihydroxyphenyl)ethylamine; 3,4-Dihydroxyphenethylamine; 4-(2-Aminoethyl)-1,2-benzenediol; 4-(2-Aminoethyl)benzene-1,2-diol; Dopamine	C03758
80	152.995	0.932329	44306.1	0.000644959	C3H7O5P	-H(-)	100	Propanoyl phosphate	Propanoyl phosphate; Propionyl phosphate	C02876
81	153.019	0.925869	183622	0.000380903	C7H6O4	-H(-)	100	3,4-Dihydroxybenzoate	3,4-Dihydroxybenzoate; 3,4-Dihydroxybenzoic acid; Protocatechuate; Protocatechuic acid	C00230
81	153.019	0.925869	183622	0.000380903	C7H6O4	-H(-)	100	2,5-Dihydroxybenzoate	2,5-Dihydroxybenzoate; 2,5-Dihydroxybenzoic acid; Gentisate; Gentisic acid; Hydroquinonecarboxylic acid	C00628
82	154.062	0.795129	278390	0.000130088	C6H9N3O2	-H(-)	100	L-Histidine	(S)-alpha-Amino-1H-imidazole-4-propionic acid; L-Histidine	C00135
83	154.975	0.787604	33012.1	-0.000234947	C2H5O6P	-H(-)	100	2-Phosphoglycolate	2-Phosphoglycolate; Phosphoglycolic acid	C00988
84	155.009	0.486789	27310.8	0.000595268	C5H4N2O4	-H(-)	100	Orotate	Orotate; Orotic acid; Uracil-6-carboxylic acid	C00295
85	155.035	0.91085	433256	0.000198764	C7H8O4	-H(-)	100	3-Methyl-cis,cis-hexadienedioate	3-Methyl-cis,cis-hexadienedioate; 3-Methyl-cis,cis-muconate	C04112
85	155.035	0.91085	433256	0.000198764	C7H8O4	-H(-)	100	3-Methylmuconolactone	3-Methylmuconolactone; 4-Carboxymethyl-3-methylbut-2-en-1,4-olide	C04558
85	155.035	0.91085	433256	0.000198764	C7H8O4	-H(-)	100	4-Methylmuconolactone	4-Carboxymethyl-4-methylbut-2-en-1,4-olide; 4-Methylmuconolactone	C04559
85	155.035	0.91085	433256	0.000198764	C7H8O4	-H(-)	100	2-Hydroxy-6-keto-2,4-heptadienoate	2-Hydroxy-6-keto-2,4-heptadienoate; 2-Hydroxy-6-oxo-hept-2,4-dienoate	C06210
85	155.035	0.91085	433256	0.000198764	C7H8O4	-H(-)	100	2-Hydroxy-5-methyl-cis,cis-muconic semialdehyde	(2E,4Z)-2-Hydroxy-5-methyl-6-oxohexa-2,4-dienoate; 2-Hydroxy-5-methyl-cis,cis-muconic semialdehyde	C06760
86	157.014	0.262433	78495.1	0.000371752	C6H6O5	-H(-)	100	2-Maleylacetate	2-Maleylacetate; 4-Oxohex-2-enedioate; Maleylacetate	C02222
86	157.014	0.262433	78495.1	0.000371752	C6H6O5	-H(-)	100	2-Hydroxymuconate	2-Hydroxymuconate	C02501
86	157.014	0.262433	78495.1	0.000371752	C6H6O5	-H(-)	100	gamma-Oxalocrotonate	(Z)-5-Oxohex-2-enedioate; 4-Oxalocrotonate; gamma-Oxalocrotonate	C03453
86	157.014	0.262433	78495.1	0.000371752	C6H6O5	-H(-)	100	3-Hydroxy-cis,cis-muconate	3-Hydroxy-cis,cis-muconate	C03676
87	157.036	0.910919	244565	0.000241264	C4H6N4O3	-H(-)	100	(R)(-)-Allantoin	(R)(-)-Allantoin; (R)-Allantoin	C02348
87	157.036	0.910919	244565	0.000241264	C4H6N4O3	-H(-)	100	(S)-Allantoin	(S)(+)-Allantoin; (S)-Allantoin	C02350
88	157.05	0.773062	170255	0.000673925	C7H10O4	-H(-)	100	2-Isopropylmaleate	2-Isopropylmaleate; beta-Isopropylmaleate	C02631
89	158.061	0.730107	58535.3	0.000473172	C10H9NO	-H(-)	100	Indole-3-acetaldehyde	2-(Indol-3-yl)acetaldehyde; Indole-3-acetaldehyde; Indoleacetaldehyde	C00637
90	159.03	0.937349	695034	-0.000105067	C6H8O5	-H(-)	100	2-Oxoadipate	2-Oxoadipate; 2-Oxoadipic acid	C00322
90	159.03	0.937349	695034	-0.000105067	C6H8O5	-H(-)	100	3-Oxoadipate	3-Keto-adipate; 3-Oxoadipate; 3-Oxoadipic acid	C00846
90	159.03	0.937349	695034	-0.000105067	C6H8O5	-H(-)	100	2-Formylglutarate	2-Formylglutarate	C16159
90	159.03	0.937349	695034	-0.000105067	C6H8O5	-H(-)	100	2,4-Diketo-3-deoxy-L-fuconate	2,4-Diketo-3-deoxy-L-fuconate	C20781
91	159.045	0.899713	254673	0.000613097	C10H8O2	-H(-)	100	Naphthalene-1,2-diol	1,2-Dihydroxynaphthalene; 1,2-Naphthalenediol; Naphthalene-1,2-diol; beta-Naphthohydroquinone	C03012
92	160.061	0.918053	105729	0.000230182	C6H11NO4	-H(-)	100	L-2-Aminoadipate	L-2-Aminoadipate; L-2-Aminoadipic acid; L-2-Aminohexanedioate; L-alpha-Aminoadipate; L-alpha-Aminoadipic acid	C00956
92	160.061	0.918053	105729	0.000230182	C6H11NO4	-H(-)	100	O-Acetyl-L-homoserine	O-Acetyl-L-homoserine; O-Acetylhomoserine	C01077
93	161.045	0.96143	3.25169e+06	0.000390581	C6H10O5	-H(-)	100	2-Dehydro-3-deoxy-L-fuconate	2-Dehydro-3-deoxy-L-fuconate	C03827
93	161.045	0.96143	3.25169e+06	0.000390581	C6H10O5	-H(-)	100	L-Fucono-1,5-lactone	L-Fucono-1,5-lactone	C18028
94	163.039	0.850038	296927	0.0007232	C9H8O3	-H(-)	100	Phenylpyruvate	2-Oxo-3-phenylpropanoate; 3-Phenyl-2-oxopropanoate; Phenylpyruvate; Phenylpyruvic acid; alpha-Ketohydrocinnamic acid; keto-Phenylpyruvate	C00166
94	163.039	0.850038	296927	0.0007232	C9H8O3	-H(-)	100	cis-2-Hydroxycinnamate	2-Coumarinate; cis-2-Hydroxycinnamate	C05838
94	163.039	0.850038	296927	0.0007232	C9H8O3	-H(-)	100	trans-3-Hydroxycinnamate	(2E)-3-(3-Hydroxyphenyl)prop-2-enoate; trans-3-Hydroxycinnamate	C12621
95	163.061	0.882381	264654	6.00122e-05	C6H12O5	-H(-)	100	6-Deoxy-L-galactose	6-Deoxy-L-galactose; L-Fucose	C01019
96	164.035	0.703179	56958.7	-7.77551e-05	C8H7NO3	-H(-)	100	Formylanthranilate	2-(Formylamino)-benzoic acid; Formylanthranilate; N-Formylanthranilate	C05653
97	164.072	0.950123	295027	0.000189248	C9H11NO2	-H(-)	100	L-Phenylalanine	(S)-alpha-Amino-beta-phenylpropionic acid; L-Phenylalanine	C00079
97	164.072	0.950123	295027	0.000189248	C9H11NO2	-H(-)	100	D-Phenylalanine	D-Phenylalanine; D-alpha-Amino-beta-phenylpropionic acid	C02265
98	165.019	0.782395	204365	0.000808059	C8H6O4	-H(-)	100	4-Hydroxyphenylglyoxylate	2-(4-Hydroxyphenyl)-2-oxoacetate; 4-Hydroxybenzoylformate; 4-Hydroxyphenylglyoxylate; 4-Hydroxyphenylglyoxylic acid	C03590
99	166.05	0.871608	73222.5	0.000839197	C8H9NO3	-H(-)	100	Pyridoxal	Pyridoxal	C00250
100	166.06	0.865942	25834	0.00175257	C7H9N3O2	-H(-)	30	2,4-Diamino-6-nitrotoluene	2,4-Diamino-6-nitrotoluene	C16396
101	166.975	0.799132	34629	0.000358317	C3H5O6P	-H(-)	100	Phosphoenolpyruvate	PEP; Phosphoenolpyruvate; Phosphoenolpyruvic acid	C00074
102	167.021	0.869602	27976.5	-0.000204669	C5H4N4O3	-H(-)	100	Urate	Urate; Uric acid	C00366
103	167.034	0.872397	528373	0.00065058	C8H8O4	-H(-)	100	Homogentisate	2,5-Dihydroxyphenylacetate; 2,5-Dihydroxyphenylacetic acid; Homogentisate; Homogentisic acid	C00544
103	167.034	0.872397	528373	0.00065058	C8H8O4	-H(-)	100	3,4-Dihydroxyphenylacetate	3,4-Dihydroxyphenylacetate; 3,4-Dihydroxyphenylacetic acid; Homoprotocatechuate	C01161
103	167.034	0.872397	528373	0.00065058	C8H8O4	-H(-)	100	(S)-4-Hydroxymandelate	(S)-2-Hydroxy-2-(4-hydroxyphenyl)acetate; (S)-4-Hydroxymandelate	C03198
103	167.034	0.872397	528373	0.00065058	C8H8O4	-H(-)	100	(R)-4-Hydroxymandelate	(R)-4-Hydroxymandelate	C05343
103	167.034	0.872397	528373	0.00065058	C8H8O4	-H(-)	100	3,4-Dihydroxymandelaldehyde	3,4-Dihydroxymandelaldehyde; 3,4-Dihydroxyphenylglycolaldehyde	C05577
103	167.034	0.872397	528373	0.00065058	C8H8O4	-H(-)	100	2-Hydroxy-6-oxoocta-2,4,7-trienoate	2-Hydroxy-6-oxoocta-2,4,7-trienoate	C07087
103	167.034	0.872397	528373	0.00065058	C8H8O4	-H(-)	100	4-Hydroxymethylsalicylate	2-Hydroxy-4-hydroxymethylbenzoic acid; 4-Hydroxymethylsalicylate	C14109
104	167.082	0.809235	33241.4	0.000764943	C8H12N2O2	-H(-)	100	Pyridoxamine	PM; Pyridoxamine	C00534
105	167.997	0.871219	32948.8	-2.71378e-05	C3H7NO5S	-H(-)	100	L-Cysteate	2-Amino-3-sulfopropionic acid; 3-Sulfoalanine; L-Cysteate; L-Cysteic acid	C00506
106	170.046	0.726249	35169.2	0.00016673	C7H9NO4	-H(-)	100	2,3,4,5-Tetrahydrodipicolinate	(S)-2,3,4,5-Tetrahydropyridine-2,6-dicarboxylate; 2,3,4,5-Tetrahydrodipicolinate; L-2,3,4,5-Tetrahydrodipicolinate; delta1-Piperidine-2,6-dicarboxylate	C03972
107	171.006	0.955284	93766.7	0.000446168	C3H9O6P	-H(-)	100	sn-Glycerol 3-phosphate	D-Glycerol 1-phosphate; Glycerophosphoric acid; sn-Glycerol 3-phosphate	C00093
108	171.03	0.904647	73933.3	-0.00018273	C7H8O5	-H(-)	100	3-Dehydroshikimate	3-Dehydroshikimate	C02637
108	171.03	0.904647	73933.3	-0.00018273	C7H8O5	-H(-)	100	2-Oxohept-3-enedioate	2-Oxohept-3-ene-1,7-dioate; 2-Oxohept-3-enedioate	C03063
108	171.03	0.904647	73933.3	-0.00018273	C7H8O5	-H(-)	100	2-Hydroxyhepta-2,4-dienedioate	2-Hydroxyhepta-2,4-diene-1,7-dioate; 2-Hydroxyhepta-2,4-dienedioate	C05600
108	171.03	0.904647	73933.3	-0.00018273	C7H8O5	-H(-)	100	2-Hydroxy-5-methyl-cis,cis-muconate	2-Hydroxy-5-methyl-cis,cis-muconate	C07478
108	171.03	0.904647	73933.3	-0.00018273	C7H8O5	-H(-)	100	2-Oxo-5-methyl-cis-muconate	2-Oxo-5-methyl-cis-muconate	C07479
108	171.03	0.904647	73933.3	-0.00018273	C7H8O5	-H(-)	100	5-Methylmaleylacetate	5-Methylmaleylacetate	C18306
109	172.061	0.951733	191053	0.00024612	C7H11NO4	-H(-)	100	N-Acetyl-L-glutamate 5-semialdehyde	2-Acetamido-5-oxopentanoate; N-Acetyl-L-glutamate 5-semialdehyde	C01250
110	173.009	0.908632	259071	-5.07766e-05	C6H6O6	-H(-)	100	cis-Aconitate	cis-Aconitate; cis-Aconitic acid	C00417
111	173.045	0.834775	213144	0.000366005	C7H10O5	-H(-)	100	Shikimate	3,4,5-Trihydroxy-1-cyclohexenecarboxylic acid; Shikimate; Shikimic acid	C00493
111	173.045	0.834775	213144	0.000366005	C7H10O5	-H(-)	100	(2S)-2-Isopropyl-3-oxosuccinate	(2S)-2-Isopropyl-3-oxosuccinate; 2-Oxo-4-methyl-3-carboxypentanoate; 3-Carboxy-4-methyl-2-oxopentanoate	C04236
111	173.045	0.834775	213144	0.000366005	C7H10O5	-H(-)	100	2-Methyl-3-oxoadipate	2-Methyl-3-oxoadipate	C18307
112	173.057	0.906937	64074.3	-0.000561712	C6H10N2O4	-H(-)	100	N-Formimino-L-glutamate	N-Formimidoyl-L-glutamate; N-Formimino-L-glutamate	C00439
113	173.093	0.952899	193919	0.00030268	C7H14N2O3	-H(-)	100	N-Acetylornithine	N-Acetylornithine; N2-Acetyl-L-ornithine	C00437
114	174.041	0.825586	45008.8	0.00088571	C7H5N5O	-H(-)	100	7-Cyano-7-carbaguanine	7-Cyano-7-carbaguanine; 7-Cyano-7-deazaguanine	C15996
115	174.056	0.848611	35377.6	0.00025044	C10H9NO2	-H(-)	100	Indole-3-acetate	(Indol-3-yl)acetate; IAA; Indole-3-acetate; Indole-3-acetic acid; Indoleacetate; Indoleacetic acid	C00954
115	174.056	0.848611	35377.6	0.00025044	C10H9NO2	-H(-)	100	5-Hydroxyindoleacetaldehyde	5-Hydroxyindoleacetaldehyde	C05634
116	174.088	0.938659	67624.9	0.000399766	C6H13N3O3	-H(-)	100	L-Citrulline	2-Amino-5-ureidovaleric acid; Citrulline; L-Citrulline	C00327
117	175.025	0.894314	209046	0.000278624	C6H8O6	-H(-)	100	D-Glucuronolactone	D-Glucurone; D-Glucurono-3,6-lactone; D-Glucuronolactone; Glucurone	C02670
117	175.025	0.894314	209046	0.000278624	C6H8O6	-H(-)	100	(4S)-4,6-Dihydroxy-2,5-dioxohexanoate	(4S)-4,6-Dihydroxy-2,5-dioxohexanoate; 2,5-Diketo-3-deoxy-D-gluconate; 3-Deoxy-D-glycero-2,5-hexodiulosonate	C04349
117	175.025	0.894314	209046	0.000278624	C6H8O6	-H(-)	100	Parapyruvate	4-Hydroxy-4-methyl-2-oxoglutarate; Parapyruvate	C06033
118	175.047	0.967793	275619	0.000190667	C4H8N4O4	-H(-)	100	Allantoate	Allantoate; Allantoic acid	C00499
119	175.061	0.913741	595667	0.000306477	C7H12O5	-H(-)	100	alpha-Isopropylmalate	(2S)-2-Hydroxy-2-isopropylsuccinic acid; (2S)-2-Isopropylmalate; 2-Isopropylmalic acid; 3-Carboxy-3-hydroxy-4-methylpentanoate; 3-Carboxy-3-hydroxyisocaproate; alpha-Isopropylmalate	C02504
119	175.061	0.913741	595667	0.000306477	C7H12O5	-H(-)	100	(2R,3S)-3-Isopropylmalate	(2R,3S)-3-Isopropylmalate; 2-D-threo-Hydroxy-3-carboxy-isocaproate; 3-Carboxy-2-hydroxy-4-methylpentanoate; 3-Isopropylmalate	C04411
120	177.04	0.924699	549843	0.000444881	C6H10O6	-H(-)	100	D-Glucono-1,5-lactone	1,5-Gluconolactone; D-Glucono-1,5-lactone; D-Gluconolactone; Gluconic acid lactone; Gluconic lactone; Gluconolactone; delta-Gluconolactone	C00198
120	177.04	0.924699	549843	0.000444881	C6H10O6	-H(-)	100	2-Dehydro-3-deoxy-D-gluconate	2-Dehydro-3-deoxy-D-gluconate; 2-Keto-3-deoxy-D-gluconate	C00204
120	177.04	0.924699	549843	0.000444881	C6H10O6	-H(-)	100	L-Gulono-1,4-lactone	L-Gulonic acid gamma-lactone; L-Gulono-1,4-lactone; L-Gulono-gamma-lactone; L-Gulonolactone; gamma-Gulonolactone	C01040
120	177.04	0.924699	549843	0.000444881	C6H10O6	-H(-)	100	L-Galactono-1,4-lactone	L-Galactono-1,4-lactone	C01115
120	177.04	0.924699	549843	0.000444881	C6H10O6	-H(-)	100	2-Dehydro-3-deoxy-D-galactonate	2-Dehydro-3-deoxy-D-galactonate	C01216
120	177.04	0.924699	549843	0.000444881	C6H10O6	-H(-)	100	D-Galactono-1,4-lactone	D-Galactono-1,4-lactone; gamma-D-Galactonolactone	C03383
121	178.051	0.901868	102633	5.88127e-06	C9H9NO3	-H(-)	100	Hippurate	Benzoylaminoacetic acid; Hippurate; Hippuric acid; N-Benzoylglycine	C01586
122	179.038	0.921292	152726	0.00070194	C6H12O4S	-H(-)	100	5-Methylthio-D-ribose	5-Methylthio-D-ribose; S-Methyl-5-thio-D-ribose	C03089
123	179.056	0.96713	6.82677e+06	0.000261247	C6H12O6	-H(-)	100	D-Glucose	D-Glucopyranose; D-Glucose; Dextrose; Glucose; Grape sugar	C00031
123	179.056	0.96713	6.82677e+06	0.000261247	C6H12O6	-H(-)	100	D-Fructose	D-Fructose; D-arabino-Hexulose; Fruit sugar; Levulose	C00095
123	179.056	0.96713	6.82677e+06	0.000261247	C6H12O6	-H(-)	100	D-Galactose	D-Galactopyranose; D-Galactose	C00124
123	179.056	0.96713	6.82677e+06	0.000261247	C6H12O6	-H(-)	100	myo-Inositol	1D-myo-Inositol; 1L-myo-Inositol; Bios I; Cyclohexitol; D-myo-Inositol; Dambose; Inositol; L-myo-Inositol; Meat sugar; meso-Inositol; myo-Inositol	C00137
123	179.056	0.96713	6.82677e+06	0.000261247	C6H12O6	-H(-)	100	D-Mannose	Carubinose; D-Mannose; Mannose; Seminose	C00159
123	179.056	0.96713	6.82677e+06	0.000261247	C6H12O6	-H(-)	100	beta-D-Glucose	beta-D-Glucose	C00221
123	179.056	0.96713	6.82677e+06	0.000261247	C6H12O6	-H(-)	100	alpha-D-Glucose	alpha-D-Glucose	C00267
123	179.056	0.96713	6.82677e+06	0.000261247	C6H12O6	-H(-)	100	alpha-D-Galactose	alpha-D-Galactose	C00984
123	179.056	0.96713	6.82677e+06	0.000261247	C6H12O6	-H(-)	100	L-Fuconate	L-Fuconate	C01720
123	179.056	0.96713	6.82677e+06	0.000261247	C6H12O6	-H(-)	100	L-Galactose	L-Galactose	C01825
123	179.056	0.96713	6.82677e+06	0.000261247	C6H12O6	-H(-)	100	beta-D-Fructose	Fructose; beta-D-Fructose; beta-D-arabino-Hexulose; beta-Fruit sugar; beta-Levulose	C02336
124	181.051	0.600178	411436	-0.000624074	C9H10O4	-H(-)	100	3-(2,3-Dihydroxyphenyl)propanoate	2,3-Dihydroxyphenylpropanoate; 3-(2,3-Dihydroxyphenyl)propanoate	C04044
124	181.051	0.600178	411436	-0.000624074	C9H10O4	-H(-)	100	3-Methoxy-4-hydroxyphenylglycolaldehyde	3-Methoxy-4-hydroxyphenylglycolaldehyde	C05583
124	181.051	0.600178	411436	-0.000624074	C9H10O4	-H(-)	100	cis-3-(3-Carboxyethenyl)-3,5-cyclohexadiene-1,2-diol	(2E)-3-(cis-5,6-Dihydroxycyclohexa-1,3-dien-1-yl)prop-2-enoate; cis-3-(3-Carboxyethenyl)-3,5-cyclohexadiene-1,2-diol	C12622
125	182.97	0.863052	194778	-0.000313277	C3H5O7P	-H(-)	100	3-Phosphonooxypyruvate	3-Phosphohydroxypyruvate; 3-Phosphohydroxypyruvic acid; 3-Phosphonooxypyruvate; 3-Phosphonooxypyruvic acid	C03232
126	183.066	0.760563	50371.7	0.000174011	C9H12O4	-H(-)	100	cis-3-(Carboxy-ethyl)-3,5-cyclo-hexadiene-1,2-diol	3-(cis-5,6-Dihydroxycyclohexa-1,3-dien-1-yl)propanoate; cis-3-(2-Carboxy-ethyl)-3,5-cyclo-hexadiene-1,2-diol; cis-3-(Carboxy-ethyl)-3,5-cyclo-hexadiene-1,2-diol	C11588
126	183.066	0.760563	50371.7	0.000483011	C5H15NO4P	-H(-)	100	Choline phosphate	Choline phosphate; O-Phosphocholine; Phosphocholine; Phosphorylcholine	C00588
127	184.001	0.84648	254023	0.000276961	C3H8NO6P	-H(-)	100	O-Phospho-L-serine	3-Phosphoserine; Dexfosfoserine; L-O-Phosphoserine; O-Phospho-L-serine	C01005
128	184.985	0.0533189	100792	0.000256389	C3H7O7P	-H(-)	100	3-Phospho-D-glycerate	3-Phospho-(R)-glycerate; 3-Phospho-D-glycerate; 3-Phosphoglycerate; D-Glycerate 3-phosphate	C00197
128	184.985	0.0533189	100792	0.000256389	C3H7O7P	-H(-)	100	2-Phospho-D-glycerate	2-Phospho-(R)-glycerate; 2-Phospho-D-glycerate; D-Glycerate 2-phosphate	C00631
129	186.113	0.836157	24545.5	0.000175688	C9H17NO3	-H(-)	100	8-Amino-7-oxononanoate	8-Amino-7-oxononanoate; 8-Amino-7-oxononanoic acid	C01092
130	188.056	0.959689	571371	9.91705e-06	C7H11NO5	-H(-)	100	N-Acetyl-L-glutamate	N-Acetyl-L-glutamate; N-Acetyl-L-glutamic acid	C00624
131	189.041	0.889234	59263.5	-0.000145933	C7H10O6	-H(-)	100	3-Dehydroquinate	3-Dehydroquinate; 3-Dehydroquinic acid; 5-Dehydroquinate; 5-Dehydroquinic acid	C00944
131	189.041	0.889234	59263.5	-0.000145933	C7H10O6	-H(-)	100	4-Hydroxy-2-oxo-heptanedioate	4-Hydroxy-2-ketopimelate; 4-Hydroxy-2-oxo-heptanedioate; 4-Hydroxy-2-oxoheptanedioate; 4-Hydroxy-2-oxoheptanedioic acid	C05601
131	189.041	0.889234	59263.5	-0.000145933	C7H10O6	-H(-)	100	2,4-Dihydroxyhept-2-enedioate	2,4-Dihydroxyhept-2-1,7-dioate; 2,4-Dihydroxyhept-2-enedioate; 2,4-Dihydroxyhept-2-enedioic acid	C06201
132	189.077	0.910993	330000	0.000304627	C8H14O5	-H(-)	100	(R)-3-((R)-3-Hydroxybutanoyloxy)butanoate	(R)-3-((R)-3-Hydroxybutanoyloxy)butanoate	C04546
133	190.05	0.881206	34598.2	0.00047652	C10H9NO3	-H(-)	100	5-Hydroxyindoleacetate	5-Hydroxyindoleacetate	C05635
133	190.05	0.881206	34598.2	0.00047652	C10H9NO3	-H(-)	100	5-Phenyl-1,3-oxazinane-2,4-dione	5-Phenyl-1,3-oxazinane-2,4-dione	C16596
134	191.02	0.682577	6.90212e+06	-0.000201852	C6H8O7	-H(-)	100	Citrate	2-Hydroxy-1,2,3-propanetricarboxylic acid; 2-Hydroxytricarballylic acid; Citrate; Citric acid	C00158
134	191.02	0.682577	6.90212e+06	-0.000201852	C6H8O7	-H(-)	100	Isocitrate	1-Hydroxypropane-1,2,3-tricarboxylic acid; 1-Hydroxytricarballylic acid; Isocitrate; Isocitric acid	C00311
134	191.02	0.682577	6.90212e+06	-0.000201852	C6H8O7	-H(-)	100	5-Dehydro-4-deoxy-D-glucarate	5-Dehydro-4-deoxy-D-glucarate	C00679
134	191.02	0.682577	6.90212e+06	-0.000201852	C6H8O7	-H(-)	100	2-Dehydro-3-deoxy-D-glucarate	2-Dehydro-3-deoxy-D-glucarate	C03921
135	192.066	0.947947	112621	0.000400285	C10H11NO3	-H(-)	100	3-Carbamoyl-2-phenylpropionaldehyde	3-Carbamoyl-2-phenylpropionaldehyde	C16587
135	192.066	0.947947	112621	0.000400285	C10H11NO3	-H(-)	100	4-Hydroxy-5-phenyltetrahydro-1,3-oxazin-2-one	4-Hydroxy-5-phenyltetrahydro-1,3-oxazin-2-one	C16595
136	193.035	0.942528	139022	-3.30126e-05	C6H10O7	-H(-)	100	D-Galacturonate	D-Galacturonate; D-Galacturonic acid	C00333
136	193.035	0.942528	139022	-3.30126e-05	C6H10O7	-H(-)	100	D-Fructuronate	D-Fructuronate; D-Fructuronic acid	C00905
136	193.035	0.942528	139022	-3.30126e-05	C6H10O7	-H(-)	100	5-Dehydro-D-gluconate	5-Dehydro-D-gluconate; 5-Dehydrogluconate	C01062
136	193.035	0.942528	139022	0.00130499	C7H6N4O3	-H(-)	61	7-Carboxy-7-carbaguanine	7-Carboxy-7-carbaguanine; 7-Carboxy-7-deazaguanine	C20248
137	195.051	0.952031	4.9361e+06	-0.000372073	C6H12O7	-H(-)	100	D-Gluconic acid	D-Gluconate; D-Gluconic acid; D-gluco-Hexonic acid	C00257
137	195.051	0.952031	4.9361e+06	-0.000372073	C6H12O7	-H(-)	100	D-Mannonate	D-Mannonate	C00514
137	195.051	0.952031	4.9361e+06	-0.000372073	C6H12O7	-H(-)	100	L-Idonate	L-Idonate	C00770
137	195.051	0.952031	4.9361e+06	-0.000372073	C6H12O7	-H(-)	100	L-Gulonate	Gulonate; Gulonic acid; L-Gulonate; L-Gulonic acid	C00800
137	195.051	0.952031	4.9361e+06	-0.000372073	C6H12O7	-H(-)	100	D-Altronate	D-Altronate	C00817
138	203.082	0.943001	655351	0.000241634	C11H12N2O2	-H(-)	100	L-Tryptophan	(S)-alpha-Amino-beta-(3-indolyl)-propionic acid; L-Tryptophan; Tryptophan	C00078
139	204.052	0.802337	25238.8	0.000701723	C8H15NOS2	-H(-)	100	Lipoamide	Lipoamide; Thioctic acid amide	C00248
140	209.03	0.892563	2.77891e+06	-0.000174038	C6H10O8	-H(-)	100	D-Glucarate	D-Glucarate; D-Glucaric acid; D-Glucosaccharic acid; D-Saccharic acid; Glucarate; Glucaric acid; L-Gularic acid	C00818
140	209.03	0.892563	2.77891e+06	-0.000174038	C6H10O8	-H(-)	100	D-Galactarate	D-Galactarate; D-Galactaric acid; D-Mucic acid; Galactarate; Galactaric acid; Mucic acid	C00879
141	211.997	0.754266	10279	-6.45359e-05	C4H8NO7P	-H(-)	100	4-Phospho-L-aspartate	4-Phospho-L-aspartate; L-4-Aspartyl phosphate	C03082
141	211.997	0.754266	10279	-6.45359e-05	C4H8NO7P	-H(-)	100	2-Amino-3-oxo-4-phosphonooxybutyrate	(2S)-2-Amino-3-oxo-4-phosphonooxybutanoate; 2-Amino-3-oxo-4-phosphonooxybutyrate; L-2-Amino-3-oxo-4-phosphonooxybutyrate	C07335
142	212.03	0.790705	20337.1	0.00149368	C7H7N3O5	-H(-)	45	4-Hydroxylamino-2,6-dinitrotoluene	4-Hydroxylamino-2,6-dinitrotoluene	C16392
142	212.03	0.790705	20337.1	0.00149368	C7H7N3O5	-H(-)	45	2-Hydroxylamino-4,6-dinitrotoluene	2-Hydroxylamino-4,6-dinitrotoluene	C16393
143	212.979	0.491097	77762.7	0.00112678	C4H7O8P	-H(-)	82	2-Oxo-3-hydroxy-4-phosphobutanoate	(3R)-3-Hydroxy-2-oxo-4-phosphonooxybutanoate; 2-Oxo-3-hydroxy-4-phosphobutanoate; alpha-Keto-3-hydroxy-4-phosphobutyrate	C06054
144	213.016	0.824789	49064.9	0.000622937	C5H11O7P	-H(-)	100	2-Deoxy-D-ribose 1-phosphate	2-Deoxy-D-ribose 1-phosphate; 2-Deoxy-alpha-D-ribose 1-phosphate	C00672
144	213.016	0.824789	49064.9	0.000622937	C5H11O7P	-H(-)	100	2-Deoxy-D-ribose 5-phosphate	2-Deoxy-D-ribose 5-phosphate	C00673
144	213.016	0.824789	49064.9	0.000622937	C5H11O7P	-H(-)	100	1-Deoxy-D-xylulose 5-phosphate	1-Deoxy-D-xylulose 5-phosphate	C11437
144	213.016	0.824789	49064.9	0.000622937	C5H11O7P	-H(-)	100	5-Deoxyribose-1-phosphate	5-Deoxy-alpha-D-ribose-1-phosphate; 5-Deoxyribose-1-phosphate	C16637
145	213.126	0.862358	25169	-0.00117025	C10H18N2O3	-H(-)	76	Dethiobiotin	Desthiobiotin; Dethiobiotin	C01909
146	214.012	0.864391	69494.8	-0.000277622	C4H10NO7P	-H(-)	100	O-Phospho-4-hydroxy-L-threonine	4-(Phosphonooxy)-L-threonine; 4-(Phosphonooxy)-threonine; O-Phospho-4-hydroxy-L-threonine	C06055
147	214.048	0.956804	148754	0.000195577	C5H14NO6P	-H(-)	100	sn-Glycero-3-phosphoethanolamine	Glycerophosphoethanolamine; sn-Glycero-3-phosphoethanolamine	C01233
148	215.02	0.839115	64478.8	-0.000267842	C8H8O7	-H(-)	100	5-Carboxy-2-oxohept-3-enedioate	5-Carboxy-2-oxohept-3-enedioate; 5-Oxopent-3-ene-1,2,5-tricarboxylate	C04052
148	215.02	0.839115	64478.8	-0.000267842	C8H8O7	-H(-)	100	5-Carboxymethyl-2-hydroxymuconate	5-Carboxymethyl-2-hydroxymuconate	C04186
149	215.033	0.768266	373458	-0.000368812	C5H13O7P	-H(-)	100	2-C-Methyl-D-erythritol 4-phosphate	2-C-Methyl-D-erythritol 4-phosphate	C11434
150	215.071	0.892028	60224.1	8.74743e-05	C13H12O3	-H(-)	100	Bis(4-hydroxyphenyl)methanol	Bis(4-hydroxyphenyl)methanol	C18215
151	218.033	0.866039	46351.7	0.000921385	C6H10N3O4P	-H(-)	100	4-Amino-2-methyl-5-phosphomethylpyrimidine	4-Amino-2-methyl-5-phosphomethylpyrimidine; 4-Amino-5-phosphomethyl-2-methylpyrimidine	C04556
152	218.067	0.953188	919507	-9.29112e-05	C8H13NO6	-H(-)	100	O-Succinyl-L-homoserine	O-Succinyl-L-homoserine; O-Succinylhomoserine; O4-Succinyl-L-homoserine	C01118
153	218.103	0.970577	226616	0.000151547	C9H17NO5	-H(-)	100	Pantothenate	(R)-Pantothenate; Pantothenate; Pantothenic acid	C00864
154	220.083	0.921716	33910.3	0.000101717	C8H15NO6	-H(-)	100	N-Acetyl-D-glucosamine	2-Acetamido-2-deoxy-D-glucose; GlcNAc; N-Acetyl-D-glucosamine; N-Acetylchitosamine	C00140
154	220.083	0.921716	33910.3	0.000101717	C8H15NO6	-H(-)	100	N-Acetyl-D-mannosamine	2-Acetamido-2-deoxy-D-mannose; N-Acetyl-D-mannosamine	C00645
154	220.083	0.921716	33910.3	0.000101717	C8H15NO6	-H(-)	100	N-Acetyl-D-galactosamine	2-Acetamido-2-deoxy-D-galactose; N-Acetyl-D-chondrosamine; N-Acetyl-D-galactosamine	C01132
155	225.041	0.834902	50308.6	-0.000213641	C10H10O6	-H(-)	100	Chorismate	(3R,4R)-3-[(1-Carboxyethenyl)oxy]-4-hydroxycyclohexa-1,5-diene-1-carboxylate; Chorismate; Chorismic acid	C00251
155	225.041	0.834902	50308.6	-0.000213641	C10H10O6	-H(-)	100	Prephenate	Prephenate; Prephenic acid	C00254
156	225.087	0.952874	50811.6	0.000853501	C10H14N2O4	-H(-)	100	Porphobilinogen	Porphobilinogen	C00931
157	226.012	0.750699	49532	-3.90162e-05	C5H10NO7P	-H(-)	100	L-Glutamyl 5-phosphate	L-Glutamate 5-phosphate; L-Glutamyl 5-phosphate	C03287
158	227.071	0.91875	46389.6	0.000434376	C14H12O3	-H(-)	100	Resveratrol	3,4',5-Trihydroxystilbene; Resveratrol; trans-Resveratrol	C03582
159	228.027	0.323002	16320.3	0.000365754	C5H12NO7P	-H(-)	100	5-Phosphoribosylamine	5-Phospho-D-ribosylamine; 5-Phospho-beta-D-ribosylamine; 5-Phosphoribosyl-1-amine; 5-Phosphoribosylamine	C03090
160	229.012	0.943081	100393	0.000355648	C5H11O8P	-H(-)	100	D-Ribose 5-phosphate	D-Ribose 5-phosphate; Ribose 5-phosphate	C00117
160	229.012	0.943081	100393	0.000355648	C5H11O8P	-H(-)	100	D-Ribulose 5-phosphate	D-Ribulose 5-phosphate	C00199
160	229.012	0.943081	100393	0.000355648	C5H11O8P	-H(-)	100	D-Xylulose 5-phosphate	D-Xylulose 5-phosphate	C00231
160	229.012	0.943081	100393	0.000355648	C5H11O8P	-H(-)	100	alpha-D-Ribose 1-phosphate	D-Ribose 1-phosphate; Ribose 1-phosphate; alpha-D-Ribose 1-phosphate	C00620
160	229.012	0.943081	100393	0.000355648	C5H11O8P	-H(-)	100	D-Arabinose 5-phosphate	D-Arabinose 5-phosphate	C01112
161	235.073	0.935797	75968	-0.000381074	C11H12N2O4	-H(-)	100	L-Formylkynurenine	L-Formylkynurenine; N-Formyl-L-kynurenine; N-Formylkynurenine	C02700
162	237.061	0.970279	353654	0.000209837	C8H14O8	-H(-)	100	3-Deoxy-D-manno-octulosonate	2-Dehydro-3-deoxy-D-octonate; 3-Deoxy-D-manno-2-octulosonate; 3-Deoxy-D-manno-octulosonate; 3-Deoxyoctulosonic acid; KDO	C01187
163	238.094	0.941231	31364.4	0.00016726	C9H13N5O3	-H(-)	100	Dihydrobiopterin	(6R)-6-(L-erythro-1,2-Dihydroxypropyl)-7,8-dihydro-6H-pterin; 6,7-Dihydrobiopterin; Dihydrobiopterin; Quinoid-dihydrobiopterin	C00268
164	243.027	0.871689	140342	9.02911e-05	C6H13O8P	-H(-)	100	L-Fuculose 1-phosphate	L-Fuculose 1-phosphate	C01099
165	243.062	0.968381	351467	-0.000233118	C9H12N2O6	-H(-)	100	Uridine	Uridine	C00299
166	253.051	0.960019	1.67267e+07	-0.00114963	C7H14N2O6S	-H(-)	79	5-L-Glutamyl-taurine	5-Glutamyl-taurine; 5-L-Glutamyl-taurine; Glutaurine	C05844
167	255.233	0.974118	1.53656e+07	4.4674e-06	C16H32O2	-H(-)	100	Hexadecanoic acid	Cetylic acid; Hexadecanoate; Hexadecanoic acid; Hexadecylic acid; Palmitate; Palmitic acid	C00249
168	258.039	0.902305	30891.6	-0.000190027	C6H14NO8P	-H(-)	100	D-Glucosamine 6-phosphate	D-Glucosamine 6-phosphate; D-Glucosamine phosphate	C00352
168	258.039	0.902305	30891.6	-0.000190027	C6H14NO8P	-H(-)	100	alpha-D-Glucosamine 1-phosphate	D-Glucosamine 1-phosphate; alpha-D-Glucosamine 1-phosphate	C06156
168	258.039	0.902305	30891.6	-0.000190027	C6H14NO8P	-H(-)	100	Aminofructose 6-phosphate	Amino-D-fructose 6-phosphate; Aminofructose 6-phosphate	C12214
169	259.023	0.958269	994535	-0.000335439	C6H13O9P	-H(-)	100	D-Fructose 6-phosphate	D-Fructose 6-phosphate; D-Fructose 6-phosphoric acid; Neuberg ester	C00085
169	259.023	0.958269	994535	-0.000335439	C6H13O9P	-H(-)	100	D-Glucose 6-phosphate	D-Glucose 6-phosphate; Glucose 6-phosphate; Robison ester	C00092
169	259.023	0.958269	994535	-0.000335439	C6H13O9P	-H(-)	100	D-Glucose 1-phosphate	Cori ester; D-Glucose 1-phosphate; D-Glucose alpha-1-phosphate; alpha-D-Glucose 1-phosphate	C00103
169	259.023	0.958269	994535	-0.000335439	C6H13O9P	-H(-)	100	D-Mannose 6-phosphate	D-Mannose 6-phosphate	C00275
169	259.023	0.958269	994535	-0.000335439	C6H13O9P	-H(-)	100	D-Mannose 1-phosphate	D-Mannose 1-phosphate; alpha-D-Mannose 1-phosphate	C00636
169	259.023	0.958269	994535	-0.000335439	C6H13O9P	-H(-)	100	alpha-D-Glucose 6-phosphate	alpha-D-Glucose 6-phosphate	C00668
169	259.023	0.958269	994535	-0.000335439	C6H13O9P	-H(-)	100	D-Fructose 1-phosphate	D-Fructose 1-phosphate	C01094
169	259.023	0.958269	994535	-0.000335439	C6H13O9P	-H(-)	100	D-Tagatose 6-phosphate	D-Tagatose 6-phosphate	C01097
169	259.023	0.958269	994535	-0.000335439	C6H13O9P	-H(-)	100	beta-D-Glucose 6-phosphate	beta-D-Glucose 6-phosphate	C01172
169	259.023	0.958269	994535	-0.000335439	C6H13O9P	-H(-)	100	Inositol 1-phosphate	1D-myo-Inositol 1-monophosphate; 1D-myo-Inositol 1-phosphate; D-myo-Inositol 1-phosphate; Inositol 1-phosphate; myo-Inositol 1-phosphate	C01177
169	259.023	0.958269	994535	-0.000335439	C6H13O9P	-H(-)	100	Sorbose 1-phosphate	L-Sorbose 1-phosphate; L-Sorbose 1P; L-xylo-Hexulose 1-phosphate; Sorbose 1-phosphate	C02888
169	259.023	0.958269	994535	-0.000335439	C6H13O9P	-H(-)	100	myo-Inositol 4-phosphate	1D-myo-Inositol 4-monophosphate; 1D-myo-Inositol 4-phosphate; D-myo-Inositol 4-phosphate; Inositol 4-phosphate; myo-Inositol 4-phosphate	C03546
169	259.023	0.958269	994535	-0.000335439	C6H13O9P	-H(-)	100	1D-myo-Inositol 3-phosphate	1D-myo-Inositol 3-monophosphate; 1D-myo-Inositol 3-phosphate; 1L-myo-Inositol 1-phosphate; D-myo-Inositol 3-monophosphate; D-myo-Inositol 3-phosphate; Inositol 3-monophosphate; Inositol 3-phosphate; L-myo-Inositol 1-phosphate; myo-Inositol 3-monophosphate; myo-Inositol 3-phosphate	C04006
169	259.023	0.958269	994535	-0.000335439	C6H13O9P	-H(-)	100	beta-D-Fructose 6-phosphate	beta-D-Fructose 6-phosphate	C05345
170	260.114	0.942911	102172	-0.000229082	C11H19NO6	-H(-)	100	Lotaustralin	Lotaustralin	C08334
171	264.951	0.42333	21082.9	0.00110553	C3H8O10P2	-H(-)	84	3-Phospho-D-glyceroyl phosphate	(R)-2-Hydroxy-3-(phosphonooxy)-1-monoanhydride with phosphoric propanoic acid; 1,3-Bisphospho-D-glycerate; 3-Phospho-D-glyceroyl phosphate; D-Glycerate 1,3-diphosphate	C00236
172	267.073	0.980219	740597	0.000659956	C10H12N4O5	-H(-)	100	Inosine	Inosine	C00294
173	277.123	0.965212	90000.3	-0.000240628	C11H22N2O4S	-H(-)	100	Pantetheine	(R)-Pantetheine; Pantetheine	C00831
174	282.084	0.966623	162805	-1.59626e-06	C10H13N5O5	-H(-)	100	Guanosine	Guanosine	C00387
175	283.206	0.930105	16624.3	0.00117825	C20H28O	-H(-)	75	Retinal	Retinal; Retinene; Vitamin A aldehyde; all-trans-Retinal; all-trans-Retinene; all-trans-Vitamin A aldehyde	C00376
176	289.116	0.87603	122496	-0.000264869	C10H18N4O6	-H(-)	100	N-(L-Arginino)succinate	2-(Nomega-L-Arginino)succinate; L-Argininosuccinate; L-Argininosuccinic acid; L-Arginosuccinic acid; N-(L-Arginino)succinate	C03406
177	292.104	0.945812	40423.1	-0.000580875	C11H19NO8	-H(-)	100	N-Acetylmuramate	N-Acetyl-D-muramoate; N-Acetylmuramate; N-Acetylmuramic acid	C02713
178	293.212	0.969378	3.74422e+06	9.91159e-05	C18H30O3	-H(-)	100	13-OxoODE	(9Z,11E)-13-Oxooctadeca-9,11-dienoic acid; 13-KODE; 13-OxoODE	C14765
179	295.228	0.969195	2.65331e+06	0.000163427	C18H32O3	-H(-)	100	13(S)-HODE	(13S)-Hydroxyoctadecadienoic acid; (9Z,11E)-(13S)-13-Hydroxyoctadeca-9,11-dienoic acid; 13(S)-HODE	C14762
180	298	0.617608	15430.5	0.000171679	C6H11N3O7P2	-H(-)	100	2-Methyl-4-amino-5-hydroxymethylpyrimidine diphosphate	2-Methyl-4-amino-5-hydroxymethylpyrimidine diphosphate; 4-Amino-2-methyl-5-diphosphomethylpyrimidine	C04752
181	298.069	0.859156	41511.9	0.000458827	C9H18NO8P	-H(-)	100	D-4'-Phosphopantothenate	(R)-4'-Phosphopantothenate; D-4'-Phosphopantothenate	C03492
182	300.049	0.949787	147251	-0.00048648	C8H16NO9P	-H(-)	100	N-Acetyl-D-mannosamine 6-phosphate	N-Acetyl-D-mannosamine 6-phosphate; N-Acetylmannosamine 6-phosphate	C04257
182	300.049	0.949787	147251	-0.00048648	C8H16NO9P	-H(-)	100	N-Acetyl-alpha-D-glucosamine 1-phosphate	N-Acetyl-alpha-D-glucosamine 1-phosphate	C04501
183	306.049	0.92262	23222.6	0.000381245	C9H14N3O7P	-H(-)	100	dCMP	2'-Deoxycytidine 5'-monophosphate; Deoxycytidine monophosphate; Deoxycytidylate; Deoxycytidylic acid; dCMP	C00239
184	312.059	0.954695	72959.1	0.000982869	C8H16N3O8P	-H(-)	100	2-(Formamido)-N1-(5'-phosphoribosyl)acetamidine	1-(5'-Phosphoribosyl)-N-formylglycinamidine; 2-(Formamido)-N1-(5'-phosphoribosyl)acetamidine; 2-(Formamido)-N1-(5-phospho-D-ribosyl)acetamidine; 5'-Phosphoribosyl-N-formylglycinamidine; 5'-Phosphoribosylformylglycinamidine	C04640
185	317.03	0.848417	41155.4	-0.00163278	C8H15O11P	-H(-)	36	3-Deoxy-D-manno-octulosonate 8-phosphate	2-Dehydro-3-deoxy-D-octonate 8-phosphate; 3-Deoxy-D-manno-octulosonate 8-phosphate	C04478
186	322.045	0.923901	58903.1	-7.10151e-05	C9H14N3O8P	-H(-)	100	CMP	CMP; Cytidine-5'-monophosphate; Cytidylic acid	C00055
187	323.029	0.9678	200626	-0.000222389	C9H13N2O9P	-H(-)	100	UMP	5'Uridylic acid; UMP; Uridine 5'-monophosphate; Uridine monophosphate; Uridylic acid	C00105
188	325.094	0.964674	78476.8	-0.00069764	C15H18O8	-H(-)	100	cis-beta-D-Glucosyl-2-hydroxycinnamate	beta-D-Glucosyl-2-coumarinate; cis-beta-D-Glucosyl-2-hydroxycinnamate	C05839
189	331.046	0.877339	55454.6	-0.000717158	C10H13N4O7P	-H(-)	100	2'-Deoxyinosine 5'-phosphate	2'-Deoxyinosine 5'-phosphate; dIMP	C06196
190	335.04	0.829095	49668.3	0.00150957	C11H15NO9P	-H(-)	44	Nicotinate D-ribonucleotide	Nicotinate D-ribonucleotide; Nicotinate ribonucleotide; Nicotinic acid ribonucleotide; beta-Nicotinate D-ribonucleotide	C01185
191	338.038	0.864848	18758.6	0.00126004	C9H14N3O9P	-H(-)	66	1-(5-Phospho-D-ribosyl)-5-amino-4-imidazolecarboxylate	1-(5'-Phosphoribosyl)-4-carboxy-5-aminoimidazole; 1-(5'-Phosphoribosyl)-5-amino-4-carboxyimidazole; 1-(5'-Phosphoribosyl)-5-amino-4-imidazolecarboxylate; 1-(5-Phospho-D-ribosyl)-5-amino-4-imidazolecarboxylate; 5'-Phosphoribosyl-4-carboxy-5-aminoimidazole; 5'-Phosphoribosyl-5-amino-4-imidazolecarboxylate; 5-Amino-1-(5-phospho-D-ribosyl)imidazole-4-carboxylate	C04751
191	338.038	0.864848	18758.6	0.00126004	C9H14N3O9P	-H(-)	66	5-Carboxyamino-1-(5-phospho-D-ribosyl)imidazole	5-Carboxyamino-1-(5-phospho-D-ribosyl)imidazole	C15667
192	338.989	0.0624607	53602.3	0.000185193	C6H14O12P2	-H(-)	100	D-Fructose 1,6-bisphosphate	D-Fructose 1,6-bisphosphate	C00354
192	338.989	0.0624607	53602.3	0.000185193	C6H14O12P2	-H(-)	100	D-Mannose 1,6-bisphosphate	D-Mannose 1,6-bisphosphate	C03693
192	338.989	0.0624607	53602.3	0.000185193	C6H14O12P2	-H(-)	100	D-Tagatose 1,6-bisphosphate	D-Tagatose 1,6-bisphosphate	C03785
192	338.989	0.0624607	53602.3	0.000185193	C6H14O12P2	-H(-)	100	beta-D-Fructose 1,6-bisphosphate	beta-D-Fructose 1,6-bisphosphate	C05378
193	341.11	0.9298	2.54339e+07	-0.000773377	C12H22O11	-H(-)	100	Sucrose	1-alpha-D-Glucopyranosyl-2-beta-D-fructofuranoside; Cane sugar; Saccharose; Sucrose	C00089
193	341.11	0.9298	2.54339e+07	-0.000773377	C12H22O11	-H(-)	100	Cellobiose	1-beta-D-Glucopyranosyl-4-D-glucopyranose; Cellobiose	C00185
193	341.11	0.9298	2.54339e+07	-0.000773377	C12H22O11	-H(-)	100	Maltose	Malt sugar; Maltose; alpha-D-Glucopyranosyl-(1->4)-D-glucopyranose	C00208
193	341.11	0.9298	2.54339e+07	-0.000773377	C12H22O11	-H(-)	100	alpha,alpha-Trehalose	Trehalose; alpha,alpha'-Trehalose; alpha,alpha-Trehalose	C01083
194	344.04	0.866916	31341.4	0.000509194	C10H12N5O7P	-H(-)	100	3',5'-Cyclic GMP	3',5'-Cyclic GMP; Cyclic GMP; Guanosine 3',5'-cyclic monophosphate; Guanosine 3',5'-cyclic phosphate; cGMP	C00942
195	344.07	0.946995	32706.7	0.00173558	C12H18N4O4PS	-H(-)	31	Thiamin monophosphate	TMP; Thiamin monophosphate; Thiamin phosphate; Thiamine monophosphate; Thiamine phosphate	C01081
196	346.056	0.964986	303383	-3.01399e-05	C10H14N5O7P	-H(-)	100	AMP	5'-AMP; 5'-Adenosine monophosphate; 5'-Adenylic acid; AMP; Adenosine 5'-monophosphate; Adenosine 5'-phosphate; Adenylate; Adenylic acid	C00020
196	346.056	0.964986	303383	-3.01399e-05	C10H14N5O7P	-H(-)	100	dGMP	2'-Deoxyguanosine 5'-monophosphate; 2'-Deoxyguanosine 5'-phosphate; Deoxyguanosine monophosphate; Deoxyguanylic acid; dGMP	C00362
197	348.087	0.91578	27687.4	0.000256441	C12H19N3O7S	-H(-)	100	S-(Formylmethyl)glutathione	S-(Formylmethyl)glutathione	C14871
198	354.001	0.749736	11232.6	0.000126612	C7H11N5O8P2	-H(-)	100	2-Amino-7,8-dihydro-4-hydroxy-6-(diphosphooxymethyl)pteridine	2-Amino-4-hydroxy-6-hydroxymethyl-7,8-dihydropteridine diphosphate; 2-Amino-7,8-dihydro-4-hydroxy-6-(diphosphooxymethyl)pteridine; 7,8-Dihydropterin pyrophosphate	C04807
199	362.051	0.865879	51138.7	6.71395e-05	C10H14N5O8P	-H(-)	100	GMP	GMP; Guanosine 5'-monophosphate; Guanosine 5'-phosphate; Guanosine monophosphate; Guanylic acid	C00144
199	362.051	0.865879	51138.7	6.71395e-05	C10H14N5O8P	-H(-)	100	Precursor Z	Cyclic pyranopterin monophosphate; Cyclic pyranopterin phosphate; Precursor Z; cPMP	C18239
200	363.035	0.817112	49841.8	-0.00030099	C10H13N4O9P	-H(-)	100	Xanthosine 5'-phosphate	(9-D-Ribosylxanthine)-5'-phosphate; XMP; Xanthosine 5'-phosphate; Xanthylic acid	C00655
201	363.217	0.947057	34318.9	0.000186986	C21H32O5	-H(-)	100	Tetrahydrocortisone	Tetrahydrocortisone; Urocortisone	C05470
202	367.249	0.944006	86314	0.000116039	C21H36O5	-H(-)	100	Cortol	Cortol	C05482
203	375.13	0.965742	135455	0.00110302	C17H20N4O6	-H(-)	85	Riboflavin	7,8-Dimethyl-10-ribitylisoalloxazine; Lactoflavin; Riboflavin; Vitamin B2	C00255
204	379.013	0.933592	34333.5	-0.000926866	C10H13N4O8PS	-H(-)	100	6-Thioxanthine 5'-monophosphate	6-Thioxanthine 5'-monophosphate	C16618
205	388.066	0.786215	14621.5	-9.86128e-05	C12H16N5O8P	-H(-)	100	Acetyl adenylate	5'-Acetylphosphoadenosine; Acetyl adenylate	C05993
205	388.066	0.786215	14621.5	-0.00143661	C11H20NO12P	-H(-)	50	N-Acetylneuraminate 9-phosphate	N-Acetylneuraminate 9-phosphate	C06241
206	402.011	0.602976	25229.7	-0.000253633	C9H15N3O11P2	-H(-)	100	CDP	CDP; Cytidine 5'-diphosphate; Cytidine diphosphate	C00112
207	402.995	0.718514	60899.4	-0.000586106	C9H14N2O12P2	-H(-)	100	UDP	UDP; Uridine 5'-diphosphate	C00015
208	421.077	0.902883	309780	-0.00162942	C12H23O14P	-H(-)	36	alpha,alpha'-Trehalose 6-phosphate	Trehalose 6-phosphate; alpha,alpha'-Trehalose 6-phosphate	C00689
208	421.077	0.902883	309780	-0.00162942	C12H23O14P	-H(-)	36	alpha-Maltose 1-phosphate	alpha-Maltose 1-phosphate	C20237
209	426.022	0.20881	188543	0.000186723	C10H15N5O10P2	-H(-)	100	ADP	ADP; Adenosine 5'-diphosphate	C00008
209	426.022	0.20881	188543	0.000186723	C10H15N5O10P2	-H(-)	100	Adenosine 3',5'-bisphosphate	3'-Phosphoadenylate; Adenosine 3',5'-bisphosphate; PAP; Phosphoadenosine phosphate	C00054
209	426.022	0.20881	188543	0.000186723	C10H15N5O10P2	-H(-)	100	dGDP	2'-Deoxyguanosine 5'-diphosphate; dGDP	C00361
210	442.017	0.694759	16836	0.000395588	C10H15N5O11P2	-H(-)	100	GDP	GDP; Guanosine 5'-diphosphate; Guanosine diphosphate	C00035
211	455.156	0.963917	459068	0.000185349	C20H22N7O6	-H(-)	100	5,10-Methenyltetrahydrofolate	5,10-Methenyltetrahydrofolate	C00445
212	472.159	0.95456	48772.4	-0.000377596	C20H23N7O7	-H(-)	100	10-Formyltetrahydrofolate	10-Formyl-THF; 10-Formyltetrahydrofolate	C00234
212	472.159	0.95456	48772.4	-0.000377596	C20H23N7O7	-H(-)	100	Folinic acid	5-Formyltetrahydrofolate; Folinic acid; L(-)-5-Formyl-5,6,7,8-tetrahydrofolic acid; Leucovorin	C03479
213	482.962	0.466776	20568.8	-0.000404601	C9H15N2O15P3	-H(-)	100	UTP	UTP; Uridine 5'-triphosphate; Uridine triphosphate	C00075
214	490.976	0.296218	19090.8	0.0016856	C10H15N4O13P3	-H(-)	33	dITP	2'-Deoxyinosine 5'-triphosphate; 2'-Deoxyinosine-5'-triphosphate; dITP	C01345
215	535.037	0.938059	57939.6	0.000617914	C14H22N2O16P2	-H(-)	100	UDP-D-xylose	UDP-D-xylose; UDP-alpha-D-xylose; UDP-xylose	C00190
216	561.252	0.946949	38143.4	-0.000973544	C34H34N4O4	-H(-)	100	Protoporphyrin	Porphyrinogen IX; Protoporphyrin; Protoporphyrin IX	C02191
217	565.048	0.823373	285982	-0.000254708	C15H24N2O17P2	-H(-)	100	UDP-glucose	UDP-D-glucose; UDP-alpha-D-glucose; UDP-glucose; UDPglucose; Uridine diphosphate glucose	C00029
217	565.048	0.823373	285982	-0.000254708	C15H24N2O17P2	-H(-)	100	UDP-alpha-D-galactose	UDP-D-galactopyranose; UDP-D-galactose; UDP-alpha-D-galactopyranose; UDP-alpha-D-galactose; UDP-galactose	C00052
218	579.026	0.507018	41702.4	0.000574106	C15H22N2O18P2	-H(-)	100	UDP-glucuronate	UDP-D-glucuronate; UDP-alpha-D-glucuronate; UDP-glucuronate; UDPglucuronate	C00167
218	579.026	0.507018	41702.4	0.000574106	C15H22N2O18P2	-H(-)	100	UDP-D-galacturonate	UDP-D-galacturonate; UDPgalacturonate	C00617
219	588.075	0.891732	9835.95	0.000129736	C16H25N5O15P2	-H(-)	100	GDP-L-fucose	GDP-L-fucose; GDP-beta-L-fucose	C00325
219	588.075	0.891732	9835.95	0.000129736	C16H25N5O15P2	-H(-)	100	ADP-glucose	ADP-glucose; Adenosine diphosphoglucose	C00498
220	604.069	0.880597	21140.6	0.000618685	C16H25N5O16P2	-H(-)	100	GDP-mannose	GDP-D-mannose; GDP-alpha-D-mannose; GDP-mannose	C00096
221	606.075	0.829784	63114.9	-0.000369475	C17H27N3O17P2	-H(-)	100	UDP-N-acetyl-alpha-D-glucosamine	UDP-N-acetyl-D-glucosamine; UDP-N-acetyl-alpha-D-glucosamine; UDP-N-acetylglucosamine	C00043
221	606.075	0.829784	63114.9	-0.000369475	C17H27N3O17P2	-H(-)	100	UDP-N-acetyl-D-mannosamine	UDP-N-acetyl-D-mannosamine; UDP-N-acetyl-alpha-D-mannosamine	C01170
222	702.248	0.948256	20961.6	0.000661147	C29H37N9O12	-H(-)	100	Tetrahydropteroyltri-L-glutamate	(6S)-H4PteGlu3; Tetrahydropteroyltri-L-glutamate	C04144
223	716.264	0.95865	13856.9	0.00079326	C30H39N9O12	-H(-)	100	5-Methyltetrahydropteroyltri-L-glutamate	5-Methyltetrahydropteroyltri-L-glutamate	C04489
224	990.286	0.526594	18472.6	-0.000623183	C35H60N7O18P3S	-H(-)	100	3-Oxotetradecanoyl-CoA	3-Oxotetradecanoyl-CoA	C05261

## Sheet: intensities1
ionIdx	ionMz	01 / siratro roots roots 31dpi	02 / siratro roots roots 31dpi	03 / cowpea nodules wt 21dpi	04 / cowpea nodules wt 21dpi	05 / soybean nodules deltaNifH 21dpi	06 / soybean nodules deltaNifH 21dpi	07 / soybean nodules wt 21dpi	08 / soybean nodules wt 21dpi	09 / soybean nodules wt 31dpi	10 / soybean nodules wt 31dpi	11 / soybean nodules deltaNifH 21dpi	12 / soybean nodules deltaNifH 21dpi	13 / soybean nodules wt 31dpi	14 / soybean nodules wt 31dpi	15 / siratro roots roots 31dpi	16 / siratro roots roots 31dpi	17 / mungbean nodules wt 21dpi	18 / mungbean nodules wt 21dpi	19 / siratro nodules wt 31dpi	20 / siratro nodules wt 31dpi	21 / mungbean roots roots 21dpi	22 / mungbean roots roots 21dpi	23 / soybean nodules wt 13dpi	24 / soybean nodules wt 13dpi	25 / soybean roots roots 21dpi	26 / soybean roots roots 21dpi	27 / soybean nodules deltaNifH 21dpi	28 / soybean nodules deltaNifH 21dpi	29 / cowpea roots roots 21dpi	30 / cowpea roots roots 21dpi	31 / mungbean nodules deltaTyr 21dpi	32 / mungbean nodules deltaTyr 21dpi	33 / soybean nodules wt 13dpi	34 / soybean nodules wt 13dpi	35 / cowpea nodules deltaTyr 21dpi	36 / cowpea nodules deltaTyr 21dpi	37 / siratro nodules deltaTyr 31dpi	38 / siratro nodules deltaTyr 31dpi	39 / siratro nodules wt 31dpi	40 / siratro nodules wt 31dpi	41 / siratro nodules wt 31dpi	42 / siratro nodules wt 31dpi	43 / cowpea nodules wt 21dpi	44 / cowpea nodules wt 21dpi	45 / soybean nodules deltaNifA 21dpi	46 / soybean nodules deltaNifA 21dpi	47 / mungbean roots roots 21dpi	48 / mungbean roots roots 21dpi
1	55.0189	4997	3193	9721	14624	5495	5393	9358	5010	9152	7824	4253	8466	4626	4845	7597	5877	10115	9148	7780	11228	3399	3950	9613	6079	9170	8075	5561	5941	8489	10316	7375	6851	7518	9636	12062	11132	8020	6275	10270	9644	7187	9471	12841	12580	6011	5630	5638	2729
2	57.0346	53815	52917	98301	121987	70118	83458	104041	79951	103742	99760	92579	102402	69744	69475	91358	85276	151850	162754	94857	113859	63646	48072	108347	102702	92947	86447	86597	97209	95130	104298	146727	128143	114702	116535	118146	123126	106458	109210	120165	111370	108370	105061	135397	141613	80142	84150	46559	52686
3	59.0134	110445	125147	161800	233732	144373	197942	200305	161655	207865	202408	177919	246946	142782	134821	211016	222881	145443	151405	324101	384402	92210	84001	211300	161056	272005	304334	155490	161696	123424	115230	129541	116322	196816	192878	128189	120610	122604	142080	389479	334172	338453	314785	154504	165400	207258	237692	80966	86530
4	70.03	1642	2723	4228	3864	3776	2463	30178	27798	88852	86280	3039	3179	73939	74774	3032	2023	3453	2947	4197	3931	1108	1026	4953	5536	8269	10320	1709	2960	1894	1738	918	1523	5816	6880	2718	2733	2492	3002	1519	2675	3342	5005	4724	4499	2035	1952	1199	908
5	71.014	119319	111032	358370	583134	175743	265373	293570	164818	161927	162603	226751	410400	94102	72591	242217	221293	629020	655499	324181	488418	122325	107560	367085	250107	190002	216867	220360	233904	166702	161440	477994	408848	328600	338700	406773	326827	492783	612999	447837	374805	346470	318249	473676	501478	96152	115523	110930	107302
6	72.0093	1272	698	4868	12093	3017	1275	35384	20953	126060	116573	2660	4445	72204	57114	2058	1281	9350	11824	6536	9125	1990	687	10013	7679	8437	9650	1725	3737	2098	1215	3980	3321	10698	7994	4967	4766	4142	5799	7029	6063	10263	8128	5320	4454	2171	995	869	1
7	72.9934	28103	27670	102611	168486	58291	75850	73359	41003	34297	34870	70792	111534	23858	18885	60680	55004	162784	173288	96580	127282	32363	27189	92653	70161	27417	27770	70412	75186	89491	100554	138874	112997	86401	82012	114859	102848	138721	171669	108797	91091	85212	75073	147070	152128	21226	24350	32296	22904
8	73.0294	46394	47776	82844	101841	71878	74956	85398	89647	66852	67845	84980	104246	55108	49649	65136	68015	88415	84663	112570	119714	34719	33116	102916	89112	63031	70572	72201	74519	56406	54573	71826	65565	96781	99662	77203	69504	109074	118230	95344	97558	93113	92975	88378	96798	73815	75553	34740	39408
9	74.0248	3842	2393	6900	9673	4864	5069	17415	14596	26229	31356	5925	7435	23838	20301	3970	4143	7474	10979	4574	7609	3898	3594	9838	5931	11034	10705	6899	4677	6433	4869	7549	6615	10566	10432	5311	5826	5772	6252	5522	4502	6170	5997	6092	8221	5125	8765	3096	6108
10	75.0089	11479	12027	30451	43208	14935	19151	28790	20770	26638	25819	16092	21107	15550	17029	16422	17601	48283	52466	19234	21633	17949	15812	27959	22005	21359	21698	15086	15506	13060	13810	29984	29519	25416	26695	31912	28104	28424	31730	19119	16241	19805	19326	28459	30244	15728	16823	15171	15160
11	87.0087	83917	79759	306467	376854	102374	119067	155008	122845	136762	144620	115474	151462	102215	97882	138423	141630	288845	297642	275296	318027	85098	78751	130890	115163	68645	73714	96140	103950	134424	138997	173661	159064	121516	120289	252283	231235	209166	218614	362256	348382	334607	337550	299471	292310	64735	69236	66777	67764
12	87.0451	5398	5459	19782	16050	9553	9338	11740	7993	9212	9016	10820	11050	9333	8728	7071	6768	10812	14167	13408	14297	6366	4337	10931	11898	13440	13259	10416	8787	8052	9737	14850	9876	11578	10800	12710	12468	9754	9618	13021	11980	13176	17935	12702	10533	8816	9505	7774	9707
13	88.9881	58845	64485	103585	125757	11883	14006	6965	7739	6572	8811	9002	10022	5472	8193	71561	81007	93594	101643	72681	84725	116835	110451	14802	13812	8201	9935	10264	11656	46989	55802	76415	81662	11999	11655	138882	135162	66073	73632	89557	86566	90108	83520	106078	106251	22352	16231	81611	75604
14	89.0244	68394	73401	174559	187389	153349	162139	225872	210513	120703	114016	187997	210863	108453	113360	78125	76608	158238	158697	152685	146848	76356	63778	263316	246437	204641	226551	148330	146139	89794	91557	119552	122994	211694	217417	136677	142813	146066	146033	122810	135736	121425	118532	158503	156742	134368	136837	86540	78743
15	91.0399	2188	4067	9639	13661	38658	47302	25920	19328	40218	34663	30843	43368	10784	8011	4156	5401	17396	18085	24406	30657	2875	2252	31549	25708	8618	8111	25708	27604	7626	7564	10518	10360	25267	24636	14587	9930	29632	32551	28481	23488	25967	24837	12332	13709	14941	22017	3148	3209
16	93.0344	22871	24962	39671	45057	14412	14322	12634	13816	14474	13713	10288	14463	11312	12616	26550	24404	69781	75570	20253	21157	116845	109559	10700	12414	12222	12163	11566	10771	32584	32806	64015	70349	9557	10867	35481	32156	15253	16221	24848	24829	18945	19068	33806	39284	10754	10998	117810	111444
17	95.0139	16602	17528	23708	29660	17896	22544	32942	19157	31282	27132	18853	25046	20285	23733	19751	20000	24752	25219	22575	26825	20622	22477	32898	22515	25423	24241	17292	21132	17373	17473	20889	20848	27390	25422	27326	23263	21862	23760	26794	24370	25498	27011	26157	26286	15522	18199	39108	38341
18	100.04	4432	6370	9358	5495	6267	7902	8000	6914	11381	11550	6867	10511	9718	7353	4479	3938	5025	6139	5156	3261	4381	3335	8168	7946	11321	10636	5772	6023	5604	7031	4218	6238	8024	9332	4341	4548	3816	3601	2733	4649	3388	4726	6107	5630	14431	16675	5368	3554
19	101.025	108406	106379	210790	289335	99788	136653	152318	114742	145082	136433	115128	150194	110112	102512	138688	132153	286471	295025	176915	222434	126806	108596	138440	110412	111925	119982	103993	106446	165568	160526	314710	292937	135415	137442	188983	186132	174629	196862	227831	209963	190984	190949	224155	251571	110971	125184	122271	119119
20	102.056	2566	3956	25122	30981	9577	14182	45512	38102	42983	46667	9256	14299	39375	31493	5712	6911	43476	42350	20759	30062	3167	3672	29647	24279	7310	5940	7127	8270	4110	4083	19964	19437	24962	24563	27277	26879	22624	28264	22150	18023	23688	25610	28252	24698	16292	22101	5289	3993
21	103.003	235962	253330	106313	102478	255841	252458	215576	217053	97144	102488	295929	290268	73201	74848	169247	151671	61087	56880	67784	69769	213753	211605	298147	305820	402390	408200	267918	250490	110572	104948	44552	46524	239080	243900	80564	80709	35540	34848	54916	61276	62248	68326	92180	91334	343545	335384	144047	161140
22	103.016	17876	17134	7078	6908	15019	16071	14995	12495	7403	6305	20718	21232	5330	5127	12215	13282	4585	4226	4584	5534	50873	55955	20827	19758	28006	31981	16389	19459	7634	8025	4669	3612	16527	16412	7094	5869	2339	2804	5166	4182	4215	5642	6883	6907	20564	23126	33533	35274
23	103.04	5749	5777	7594	7469	25176	27960	29653	25550	27056	24433	32920	40315	12558	13955	7231	6044	6405	8304	31627	29352	7279	7585	36539	33376	21220	23695	26148	26445	7602	5895	8697	6156	26973	28248	7031	6939	8371	9445	18063	15262	22997	19806	9150	9091	15096	17432	7049	7572
24	104.035	2587	3127	7024	8934	3578	5597	21922	18403	22309	21950	5216	5170	18216	14588	4139	4366	8681	9510	7721	7334	6528	5409	29448	26635	11945	11655	4495	5085	4169	2947	7064	7423	28542	28865	11470	8328	19635	18220	6166	6576	8205	7210	6151	8651	4713	4412	7276	5895
25	109.03	12131	13074	22529	29153	6445	9811	7887	7609	7736	7381	6003	8448	5889	7669	15826	14706	14174	13884	13799	15049	10883	9693	6363	9748	7973	7552	7744	6802	20071	17414	8923	7276	8087	6184	23278	22803	8497	6769	17440	15071	12865	14698	27547	26733	5550	8066	14163	15279
26	109.041	2691	3121	9531	12359	2308	3675	10138	10984	7334	7874	1840	2413	9039	7054	2968	4071	7692	6427	2866	3237	7041	7964	9820	9832	2659	3480	1776	3031	2637	2740	6771	7884	6400	4973	11975	10635	7091	5559	4708	3281	2176	4856	8416	6623	1303	2735	8998	8610
27	111.009	216121	208064	174014	208167	101296	115194	97034	78855	112632	103762	104126	128613	85869	81602	597103	590676	602014	619637	303198	344704	146066	123527	91806	82265	114505	117237	91368	85861	231693	243347	315189	281525	97303	95324	175092	167754	376289	409555	677293	664826	267298	253927	197142	200456	110970	119851	129945	131164
28	111.021	18651	19042	21167	19552	16856	18366	21330	19519	20071	18005	17471	17754	15631	19286	46025	46525	50336	49563	32441	33269	92275	92708	17694	18241	11601	11842	16047	14485	19875	19659	27441	26919	22732	24248	20358	17557	32242	38082	52138	57170	26407	25216	21764	20687	14330	16356	64314	75496
29	113.025	197939	212455	371227	475510	157547	183637	241960	222462	215554	233521	175136	211027	196026	195696	289681	275654	283226	288351	311125	344829	187596	171034	225048	216214	313975	343811	166288	179084	332893	324280	221293	218348	218197	235930	392262	410252	263016	292800	394245	366857	359855	379485	412766	442154	196633	206803	191892	191596
30	113.036	20985	23310	41934	45023	21538	24955	785992	692757	2177029	2254818	83448	74810	1919530	1917511	78907	68922	67653	74044	45115	47970	110776	134381	155403	142961	253534	276573	38548	35949	39147	38934	39267	38344	160350	162684	45187	45415	35637	41642	40728	38711	52028	52678	46954	43366	22426	23781	80301	86033
31	114.056	12216	9341	51279	56073	23184	25710	68338	67514	79130	79342	30730	33425	79767	88322	16905	13193	62849	67887	49028	50688	18381	14098	30100	29881	29118	30703	24759	25628	21344	17485	58518	62663	37449	40604	49193	44789	40942	48645	39893	35120	42745	45503	48825	50220	20897	20142	20952	18343
32	115.004	511635	511839	2593359	3067659	1921979	2141339	1603773	1316561	646506	636988	2128352	2535553	589059	576457	1043890	1051410	3494612	3634729	2868027	3155904	412557	346714	2279509	2042499	523591	530175	1884271	1939311	522549	535290	2770515	2681081	2090920	2055700	2091205	1954805	3265285	3533657	2528204	2383161	2130389	2061555	2522046	2655838	512325	554132	301066	302102
33	116.035	13823	11335	20154	18473	16324	17555	23102	23594	48609	52780	18195	15985	47325	48152	14190	10431	16070	13120	18733	18417	6889	7022	14820	14751	9857	10427	12675	12379	9098	8033	11076	12567	14620	12951	11121	10301	12748	13997	14075	14331	15263	18711	12659	11877	11251	14734	15327	13522
34	116.072	27943	25375	97324	140580	102506	123755	417306	337294	424069	428842	136921	179117	322471	340385	69149	57149	170678	191568	107548	125906	60738	50956	209274	191171	309070	346605	135836	137931	58915	59594	125808	122589	222183	228718	136610	123533	89478	95282	112778	101237	108290	107407	113804	126842	144963	177075	64075	58627
35	117.019	58153	63085	403085	517730	324049	340475	329246	295183	274010	266698	312548	371528	194459	197914	143834	139290	429745	429390	429373	453782	58556	49012	397184	380502	166381	160055	323855	340001	108771	116900	300231	298465	378704	412536	361662	357469	480246	518192	316863	318170	253513	237286	424104	444319	327066	377800	66004	61124
36	118.051	10077	7993	27270	36808	26935	28391	117454	86909	106397	98186	32195	48072	87270	85040	15057	14501	38909	42659	20294	27595	25704	25843	52067	42821	64974	75414	21686	25127	11905	10453	30404	27313	56049	53391	26971	23600	24970	27410	21345	17234	22980	17314	30015	30282	17447	19576	26771	22425
37	118.981	59475	55225	87073	99679	54081	53421	67466	67737	47948	44105	53896	51760	48778	49738	54511	50070	55542	56962	58463	61709	36238	34888	76265	64207	90021	97660	43987	46932	53536	53601	52627	51221	59394	62104	64454	76091	45645	43356	49295	52657	47241	49415	79787	76424	39967	42725	33718	42729
38	119.05	50616	53936	72880	97678	61973	71523	88304	76813	90986	91078	65550	70089	69052	61480	62451	57761	803197	818139	216948	237529	1283033	1157306	131896	105507	87822	84846	76224	87514	279488	294902	711943	693460	95035	90855	79837	72697	87451	99392	100803	99434	101287	103554	72266	82197	115472	136096	1172271	1204482
39	120.045	10565	11306	28601	34602	19618	23563	28664	26296	36066	39756	21602	27118	23897	27260	13224	13184	27996	33162	25638	22473	14519	13497	23638	21042	14703	14707	18114	21027	25640	25342	18231	17085	16936	19646	25282	24086	15441	12646	21768	19583	24126	21959	25904	23234	7947	9890	18042	19460
40	121.03	707376	695938	451606	535551	485453	559242	1108883	925524	1400250	1358353	538945	633050	929377	896392	745279	716185	1558470	1620224	727808	811582	541160	460509	603252	576455	456923	487508	499187	529123	491783	494734	760555	705510	462494	489575	336913	310700	412506	436277	654830	603362	833433	789199	372719	378321	712100	799893	522201	536937
41	121.041	73271	68593	57189	63804	62123	74230	117711	112238	135769	139397	70416	77800	107321	101991	74213	74804	130903	138655	79321	83263	285229	331564	75160	75489	53713	54140	64646	64691	51464	47755	73102	66385	64204	62214	41803	44012	47063	49202	62612	66968	76570	77041	44581	46353	74953	75302	250542	233224
42	125.024	377749	410140	1376008	1700900	1296823	1444802	1969879	1854426	2425266	2517822	1415238	1643626	2158881	2256273	766545	756699	1099970	1180982	1343646	1472273	361434	291925	1367899	1365360	837398	863897	1153501	1271294	568875	565730	704598	663056	1247353	1316057	1383424	1464213	1055176	1100199	1309608	1283920	1463433	1581297	1336210	1398621	749757	800024	259229	272375
43	125.036	50758	56142	140805	160987	127036	146876	201208	191468	260425	280982	148069	160627	232882	247359	95236	90049	120009	129179	141711	153236	208961	274442	132039	133749	96223	87896	111533	124230	94005	62778	80173	77971	119287	123228	120551	137293	101808	96082	117748	122762	136359	145356	116644	116763	75152	74276	196039	190737
44	126.092	1349	1553	3008	4237	8590	6583	7690	7163	7735	7133	11445	12126	6809	6637	2919	2142	3740	2531	4356	2774	1917	1860	12686	14117	29914	33490	15360	16733	2503	2723	1365	3220	16905	15041	2955	2069	1938	1929	3398	2421	2473	4621	2962	2729	19038	19926	4477	3013
45	127.051	20746	19318	139933	168465	25375	26237	195164	180689	113206	114637	28163	29371	124631	137392	25560	23798	124408	126509	50254	53316	29161	41734	165769	164070	37554	32801	20533	20057	22904	22136	88045	83212	93409	97632	177866	168219	80265	81955	43555	42626	49806	51677	94261	99877	16763	18557	35105	32258
46	128.036	117696	108581	446556	567126	223476	242500	759833	641195	591819	593921	251707	288221	562964	564246	194403	184638	707161	748161	339892	375098	190511	168710	652075	590866	274918	298776	219708	241450	186327	178275	396425	373800	527708	545899	529338	484207	390954	428989	334756	331701	375564	359475	461076	474330	203871	210188	283434	277803
47	128.071	18746	18765	26239	28282	29491	32380	81693	85011	99702	101138	34143	36299	98726	103355	16241	19270	48599	42353	382992	423658	26005	23389	84918	83479	73761	79455	39768	35906	20391	17328	115231	115551	62121	61163	25032	24299	250668	273256	55340	68435	47503	45804	25839	24435	29872	28544	23881	32345
48	129.019	332743	340556	649486	679733	512907	534155	442856	501362	433042	442082	524444	527695	446333	462699	481353	490096	693959	713758	623946	592503	370020	351955	467407	488969	291391	304026	482028	514681	615639	651335	465532	486177	470667	481061	537383	609903	540592	544408	705593	725408	546820	558806	662705	675042	335684	333231	256905	274052
49	129.055	188405	205071	101044	114547	87625	99608	166083	149323	195722	188595	103855	111798	144972	149193	218503	210853	141157	159379	234090	270121	67515	59950	127634	120688	76273	84636	70790	87175	72493	76367	97565	92081	129258	133120	93024	87760	572513	617454	264267	261509	212853	203081	102819	98822	88230	89241	76725	81568
50	129.103	11721	14220	17057	20937	19515	21841	20833	22618	25267	26717	19811	20729	26303	27091	11517	12822	46742	53290	18960	17676	24124	29207	20857	19504	10642	13009	19708	16245	12230	11158	25190	29607	15820	16033	16038	14820	17913	17568	17278	18342	17186	17125	16230	19892	8341	8826	27680	27001
51	130.051	17970	17680	37152	44366	73073	66579	134438	147629	296571	319431	79382	88841	206303	222167	21755	19486	51670	56094	53258	49317	75485	72059	73523	78269	56301	58757	87479	93275	21860	19370	43735	43974	70320	75886	29924	28523	39647	33850	55685	54999	40464	42868	38415	33964	112265	106611	63982	67597
52	130.087	190016	191809	185350	190135	190572	193376	831669	947856	1288963	1378033	297218	287529	1473031	1585967	190665	178342	374351	384442	200903	204626	323070	309501	328507	363495	1179016	1238047	217838	223042	260156	272927	359407	382524	440439	463576	211906	230091	201010	197898	137226	144604	161010	160920	197550	200408	413284	452387	338782	377575
53	131.046	29340	27266	60693	69540	97792	94869	5358817	4403309	13165804	13526887	354531	341520	11099088	11408374	275554	210539	345542	340284	143213	116007	475705	548238	953156	821782	1605796	1787463	126385	127089	65307	63720	211275	248890	1057309	1069650	46804	42406	83828	80762	83212	100025	162841	173364	65325	68362	47904	45946	457239	536828
54	132.042	24541	25352	151944	160717	73583	70242	367265	376936	1548234	1613957	79056	70465	1963213	1982773	57781	54846	131973	137146	156324	142385	32867	30860	171793	168485	60193	59845	49678	53749	27971	26252	60960	60629	145039	142628	100245	98955	107305	114838	145613	143278	173498	180167	113479	111434	30801	33034	21931	23520
55	133.015	5801682	5882761	23453162	25250300	19915452	21241858	16038541	14078415	7009791	6842944	20806570	23023272	5427985	5242664	11665410	11519180	24584964	25667374	23667590	25160768	4579518	3897870	20856018	20068704	5654134	5705303	19536468	20814310	5800360	5838291	21118648	21044772	19489820	19896838	19731742	19400444	24786940	26502990	21848652	21964100	19824296	20192964	22315514	22941780	5733856	6036087	3312588	3302320
56	135.045	245429	265868	370725	405482	395513	389300	374757	401752	325448	360808	340273	347306	330637	340767	220842	223488	459173	469035	343565	350835	538351	520245	359737	372233	208557	210819	329439	350786	295728	295853	485315	498757	364210	378330	338956	333921	402867	400550	281641	289574	291792	299095	382767	394037	235890	247907	697107	734902
57	136.041	50261	43222	158035	205386	104919	116231	135638	104243	138538	138605	103536	123884	111939	114893	84527	91332	371310	397999	122851	127320	43912	37242	102989	91049	48412	51672	86946	97897	38330	34508	255031	242789	81525	82741	151718	138065	118313	122410	107023	92994	97820	99935	140806	143084	43433	40982	41546	41753
58	136.076	11670	11553	21421	23484	18255	17966	22940	23342	25132	26904	18361	17334	26930	24742	11392	10247	23252	24038	20917	20531	10802	10967	16751	15480	13802	12167	14785	15400	10293	10612	17604	18086	13012	14268	16072	16830	14193	15434	21243	17183	19895	20640	20223	16595	11015	10050	11953	15106
59	138.019	324071	339497	207083	208483	201691	208994	201335	190510	228197	211486	192368	185381	191233	197075	451172	439870	199770	193545	197625	204455	156991	132184	166644	163870	204924	198854	150911	151105	235199	233537	176599	158475	152364	153913	140277	139229	189542	186331	155551	149678	134557	133042	137359	139888	143052	141831	198121	196961
60	140.012	33409	31418	46223	51041	37537	38104	44024	37232	60221	63570	38767	48300	49056	44846	32009	30641	65677	71673	56158	61805	34651	30389	42943	45309	65621	63598	40742	33135	39356	42668	47802	42575	47962	51140	45066	47929	50341	51956	54216	55968	73929	68599	52375	51475	36595	41109	24078	23849
61	140.083	5326	5992	15280	16357	11822	9731	98607	106537	182349	181382	15203	15819	249858	260558	11626	9954	10132	11365	16024	14494	8120	7617	38109	33781	12479	11232	14200	12532	7367	6401	8005	8778	28912	27365	12306	15434	8588	9378	13398	13750	20112	22076	11847	11464	13012	10851	9718	10857
62	141.019	535435	551894	754299	801224	697132	715230	884236	853380	987878	977123	775300	823281	851298	902269	666484	652719	650322	658539	905310	890412	424142	351852	825765	845059	762589	807420	716619	750475	530259	522687	707701	672477	854590	881420	693512	690338	787015	783929	877165	855506	942329	965586	710361	710956	657548	709469	292649	285794
63	141.068	14555	14601	31503	36224	24627	23764	28795	35692	33533	39280	23545	19896	39355	41548	16705	16699	21876	19863	33387	29950	22342	24738	23445	24661	17216	18322	27415	24081	14959	14544	14748	15113	21137	19989	26063	27232	18553	18875	29219	27715	30147	29631	24855	25838	16968	16521	28349	33342
64	144.067	70127	72311	82473	105328	89070	94717	319069	262043	592264	587976	99938	107399	495235	461875	70534	70130	79221	80786	195666	216285	49726	44232	142088	120755	52890	50492	68359	68668	49133	49302	56287	54810	108765	108739	61294	59614	77829	79506	170098	157496	170408	169712	60850	66171	141116	169386	82605	75625
65	145.014	95427	105669	1069047	1072152	611841	614696	399728	439188	300316	299022	514727	516826	281447	285803	169819	179349	1146517	1165789	290031	278362	148189	150385	363742	396583	126067	122584	491574	511520	177969	181824	1557810	1613281	367513	384144	660019	680735	233849	236945	273078	285186	237492	249039	801845	832102	381908	383013	134887	138791
66	145.05	80158	72698	164721	176782	100021	110789	162396	168756	176951	179396	108163	127043	145249	166263	99763	85444	177448	186196	116238	127548	121479	108865	147398	143722	94426	93357	91966	98546	100157	104346	178470	171402	122642	130159	123590	136055	93481	105328	92738	89732	99555	97294	119712	115412	72279	73268	148900	154629
67	145.062	41592	37805	987730	1086490	83914	76594	1354876	1328796	700993	684002	79672	81736	754001	785493	40877	36096	972969	995271	233649	235081	93339	108272	1253559	1212597	159139	160213	54235	54754	41241	34597	641608	646261	664893	660419	1168196	1136377	556089	589358	188105	192685	278559	276853	586858	631028	60881	61158	93649	101972
68	146.046	116414	104173	1751373	2194945	613480	671545	2261821	1929817	1615579	1651280	617717	732608	1579568	1547492	333578	331376	2941066	2966633	1206971	1295412	122354	114482	1770180	1597675	251810	272098	457762	502595	182863	169653	1297455	1243762	1453793	1467562	2000930	1745592	1439597	1518377	1113471	1019386	1432641	1371892	1681849	1787884	489137	528445	155042	144931
69	147.03	125386	128331	1248317	1465964	696410	812223	1329019	1139887	851688	853087	692019	835543	477412	496371	295125	282700	922020	973241	2623889	2844935	207490	171631	962712	896120	225377	220987	729461	772847	289222	322257	702899	672224	781241	784093	1014350	950175	989817	1080890	2960068	2957381	3135131	3164615	1350855	1422712	506132	521626	152184	153741
70	147.045	189455	203084	194315	198410	141610	146825	218328	238309	171556	168313	142934	159592	161489	178840	412944	397464	1150714	1125556	360185	377607	1835667	1671278	191274	201353	93159	94632	138317	145473	75639	82501	817255	797774	171150	180229	162103	176434	272961	283629	377062	380255	362379	366960	188278	187545	139233	132212	1630290	1691765
71	148.042	23722	23055	52864	54458	34208	38197	55154	53947	50088	59376	43824	41331	49945	47608	28706	30017	68493	72597	47292	48662	44116	44445	48695	54682	30657	29050	25299	33390	37433	33107	39607	40642	45272	45482	41116	41454	36983	33365	37087	41243	40109	43017	41689	43138	39309	43850	44865	45992
72	149.009	23562	22105	1006470	996898	54685	40190	30650	32779	25064	23239	33191	33037	24060	26966	17820	18233	2292636	2318635	61850	46027	4671471	4494614	78172	69057	47313	48895	31693	30764	712568	743571	600575	617302	44704	51477	963626	1002484	46405	38921	27837	25653	18464	19640	1011796	1078861	53926	45669	4093287	4328691
73	149.046	99423	94591	116951	147024	6397368	7153317	15703677	14334974	6805317	6997634	9778981	11559432	4726296	4633133	317891	287696	797719	826307	177142	178344	769145	723779	16237634	16295578	10103060	10904337	6889126	7307187	525889	497439	501159	513974	12201835	12630357	542581	445892	296176	281328	245653	233585	199709	202018	236649	236317	7576090	8529933	848126	820979
74	151.026	20719	21253	61933	58483	22202	20107	91347	76309	126357	139038	25325	21169	137675	139768	15350	15334	36191	36010	63434	72988	39481	45883	52960	56238	17935	19872	25543	22998	11895	14150	19245	21244	43159	40470	41536	42890	28100	27386	82828	91496	115004	112113	43660	46901	19952	21244	46194	44608
75	151.04	824813	841091	152874	175181	157362	169784	158287	171649	159388	159628	163250	161955	143163	152408	497617	484547	285906	286921	155397	163315	134500	126821	147421	167728	130842	131000	137600	151752	118489	114933	135039	132629	146914	158428	139860	154226	177309	172301	163213	171959	141996	150347	190472	180912	129097	132745	164781	170359
76	151.061	99718	100705	110625	131953	89652	98047	115135	110910	121383	128606	107122	111561	106044	101662	79652	83145	56617	58777	105030	115819	63617	73577	106541	106905	75237	76860	91933	100992	68235	64531	51413	46730	92383	86263	84765	91349	80702	80582	110088	112063	118736	118235	90483	96815	86876	94297	60220	58627
77	151.112	23334	22441	18034	19688	23245	23245	24749	23979	31475	30004	27527	25656	41539	43406	19659	16500	18974	23765	17625	19903	12583	11711	29866	29209	20516	19882	23200	24384	16002	17989	20876	18108	26888	27644	19140	16716	19551	18701	16972	18425	17981	17784	20280	18515	24860	31434	27873	27246
78	152.034	116082	114772	66657	71404	111579	118937	113698	108750	103807	113640	101869	107166	104396	96780	128450	125617	64659	66084	65801	60395	43290	34698	100816	96264	88559	93578	72490	82979	84631	83698	47291	48247	79898	83510	43876	45860	39864	37210	41122	40486	38377	39526	39594	39208	71371	78006	57046	55953
79	152.071	15206	15319	42012	40555	43754	38739	45953	50357	54141	60425	42572	40697	52814	60477	18746	19716	40356	39713	36567	40218	10648	11613	43635	39749	25988	26038	32532	31596	13312	16312	16182	17171	32361	33597	36099	34472	20035	18609	30435	32841	32738	37263	35015	35631	21337	19018	12598	15775
80	152.995	34845	40745	34463	37082	39260	38334	36795	41864	30546	29182	41699	38800	95051	100819	45529	41050	30724	32082	96678	99627	33340	29671	45576	48495	20316	22278	34231	37775	58905	59167	30410	28520	41473	40637	33963	36882	75461	75993	77788	81929	105325	116803	36309	32838	34662	29846	23698	23454
81	153.019	144096	144798	161867	175730	260423	268352	195901	193075	195672	217277	238827	251882	203087	211749	131385	131461	464711	457048	237624	235180	99187	92919	186362	181587	197114	214194	243764	257247	158950	164419	223225	219044	167351	185753	141486	141094	107218	107561	168080	178515	188439	189958	151425	148510	117187	130813	80529	85363
82	154.062	111118	122369	70011	87424	67509	75053	223551	200854	758564	765033	119916	127765	766769	810008	56258	45900	78943	82597	29842	32308	124725	107411	118227	101247	970046	998273	75781	79198	69696	72482	447670	445368	161386	162826	61335	55525	30070	30890	24672	25110	33433	34807	40304	48040	183362	190764	197108	175010
83	154.975	11197	13509	34525	42178	39248	36276	20417	18378	10978	12026	36766	38918	10662	8656	18886	17056	55703	59559	49523	56687	16462	19187	46067	40448	17587	17381	36696	43396	20424	20309	54165	58655	49292	46513	39344	35888	82096	81336	34482	33652	22442	26483	56908	50858	28711	32572	18072	21179
84	155.009	21992	21823	36926	39518	30233	30182	28385	26774	23669	25786	30808	32210	30099	29976	30193	26771	39663	34979	35266	37713	44304	63347	25897	29889	19842	21927	29002	31698	18935	20512	31827	34062	25504	22839	31811	28582	33450	31898	29268	30180	22969	25843	29117	28864	15380	16433	51569	40502
85	155.035	476179	530448	1384533	1456159	137443	144822	161352	170920	144513	159098	136839	150146	141014	147770	529131	546422	283550	300634	739662	735197	157713	156352	162809	167091	112086	118557	134479	145006	822273	831986	250424	248738	152491	159873	1036774	1115008	366385	368024	851011	886166	690329	725979	1215666	1255407	99199	95975	164979	170448
86	157.014	98126	99940	160081	165097	108513	117292	125853	114406	130747	122110	106946	117765	101374	103732	90379	83584	121246	130112	113926	121678	60487	51060	75263	71918	69135	63061	73795	73571	72457	69850	84260	81299	59424	64629	78946	78659	73176	71238	110051	104901	120781	127487	81340	88844	44242	47933	31896	36222
87	157.036	22589	23590	140907	160932	26062	26262	301914	294342	2886346	3014736	69165	49132	2140658	2310306	63103	50038	96396	96604	75793	76311	24318	22436	97986	101334	31601	35985	24353	22616	26171	24750	33474	34939	74738	77675	85718	87817	50025	45949	74050	75752	81764	88598	88058	92427	15510	15036	14941	16775
88	157.05	93035	93601	199304	212225	160706	161843	191542	218158	385325	404523	180182	193684	363464	382838	130436	129162	119059	126277	300486	301965	74018	64110	214606	230868	153569	152814	169727	177754	89404	90519	137329	142542	201473	201000	139687	150652	226048	239754	248408	265989	286260	298826	146810	147521	119236	121675	74089	65532
89	158.061	12078	9675	50640	57231	30139	33467	58274	54592	65998	71089	46139	58547	71239	73080	23195	22697	59685	58638	53637	58532	35156	37991	44703	40743	42149	46867	43303	55762	30000	34542	42137	39898	65697	71459	66800	70036	41095	37799	58458	56220	68431	68584	56382	57617	40040	46992	38767	41805
90	159.03	140856	157055	1346955	1523164	500229	519272	599530	582722	586854	608551	520001	567158	471279	493397	201816	187128	1000124	1024431	1004990	1070503	417709	390321	444898	463868	170098	168772	396582	408586	558861	544248	932619	922145	391163	398484	904806	919280	411892	424401	1079879	1071877	1271432	1275220	1175375	1249103	282894	275794	251592	263779
91	159.044	72593	78968	253985	279610	311361	331505	118073	113988	128696	135669	199202	209949	117786	125844	66174	70456	633528	631953	140555	141848	1339759	1224930	93071	89967	76920	80993	162336	171323	101769	91594	560838	526034	83421	80582	156269	161937	80399	82324	135789	135509	159114	161651	199096	196778	93476	91887	1157150	1199126
92	160.061	51607	49276	107972	116012	80902	84117	188427	202205	179023	187195	82753	84292	184409	200646	40935	37874	109292	115008	168881	162271	100376	104378	100143	109318	57991	52595	55072	59316	31366	35399	95218	102116	91117	96855	75193	73843	69168	73342	115794	117044	154432	147401	73797	73718	53267	55017	81000	73702
93	161.045	1264642	1390642	3693729	3925087	2830757	2868145	3611125	3923914	4161577	4305247	3223605	3192321	4104356	4464352	1725711	1734832	3850333	3971301	4669668	4646403	2279775	2118502	3416087	3701697	1882033	1943180	2780959	2931548	1622692	1655977	3806011	3878642	3297066	3510793	2946363	3207525	3143414	3134311	4304576	4597858	5019182	5415152	3220468	3306185	1858459	1893042	1705452	1815039
94	163.039	114498	106414	340174	328645	153995	151071	157209	165059	155648	157694	155219	152801	141667	151406	115110	116126	365616	373888	333498	307645	522279	491761	142659	144573	134255	130620	145572	154638	1188596	1207948	345978	369537	136667	132852	307508	334537	136288	122255	177981	181866	223071	233413	344173	350824	163086	152834	525050	560277
95	163.061	74596	69687	130229	143402	292160	314434	578954	572753	661986	695587	323879	349120	667336	700503	125825	111448	183396	175186	128483	132966	188140	204948	361954	368891	180983	189141	307023	305045	317398	325156	164203	157424	317679	318016	134888	131054	90167	89793	103143	103107	99824	100974	131717	136954	177694	177811	143644	157428
96	164.035	45303	45399	59747	64674	62612	68806	71452	78706	110973	108268	61750	67487	97846	101084	56699	53373	50437	55087	76688	79851	40979	39652	82343	89807	69075	68975	52174	59922	47440	44322	30979	31501	73175	69953	42198	47842	39368	36186	56111	60112	55805	61523	44229	48432	43979	43573	54983	54116
97	164.071	64729	69294	253325	273823	201251	208220	472987	479928	363396	383186	194989	212276	367676	384201	93880	86757	332734	341923	355309	347749	129916	130676	220539	230334	361556	380533	161445	164421	186459	192793	240074	249440	310463	323322	232982	235031	182702	189562	281526	286408	387203	377090	235562	260954	160913	165957	173616	168471
98	165.018	244542	265520	324653	327028	273410	279695	254949	258979	236037	238449	231162	234600	232448	237451	243692	245563	219521	215173	224982	208698	154494	131407	215724	232992	146294	142184	169208	177547	218317	226453	143510	151197	183973	195165	247692	269115	129509	122796	175257	184640	162370	173867	253640	257308	172865	172484	200131	213036
99	166.05	27413	28889	90338	101116	81794	86547	100579	100787	119567	125467	88145	94571	133373	135804	41000	35135	66123	70374	101344	101938	27848	30093	92604	92574	55087	57205	83828	86249	33751	30512	49484	47194	70377	78017	80899	78641	50507	48359	75462	85409	88613	94709	79916	81262	46714	47219	33569	34992
100	166.06	13120	12758	24109	25666	27025	31650	35795	33484	40982	45990	37260	37127	51598	54857	16408	16806	33955	31594	20858	19725	26765	26676	33914	34050	19969	21154	29749	31920	13230	12109	19985	23312	29818	36933	18700	20949	14608	14223	18092	18435	14833	21766	22463	22374	25067	25069	30370	35356
101	166.975	16016	20245	37390	45079	24117	29307	24884	22211	15265	13803	28834	29196	18410	17606	17786	17443	58196	59271	45506	48143	27835	25377	23768	28541	45427	47305	31082	33465	38671	35011	50020	49798	27484	27304	37458	34233	34555	35630	48194	42701	36426	37140	46428	43611	22508	21441	24546	24311
102	167.021	40038	38227	31631	33277	35386	36694	29623	33125	33136	35852	37171	35349	35045	36258	27648	23707	36761	37631	20699	18588	19356	20610	25908	32059	19470	15458	32284	33101	23471	18612	35082	37858	26638	29507	25745	31479	18918	15341	17087	18556	19879	19885	27072	26459	35819	37096	20544	22650
103	167.034	1099687	1136608	217434	226476	826090	813322	647541	688822	793448	835812	1011766	1044267	676684	688371	837482	808802	525883	494026	221294	217036	395005	361311	645962	708370	314097	307124	960344	1031540	431637	432525	492645	510584	587582	637335	284892	286603	261212	264287	225299	226766	186345	202448	270319	273059	948935	1040369	418186	432018
104	167.082	22373	22444	37414	39291	32522	34412	52012	52910	59767	65880	40116	38382	59212	62581	20659	20854	33061	34856	25814	24547	26519	27181	44677	38551	36318	36133	35793	34654	16628	15328	24449	24968	34967	33411	34928	32814	18976	19622	21331	18482	22509	23800	32513	37492	23984	28926	33359	33088
105	167.997	19857	22303	55122	58871	18763	24835	79760	71290	73682	81622	19508	18593	74220	81522	13403	14314	34265	35795	59711	57878	8918	7076	22606	20900	12172	11712	16842	19886	7685	6542	23235	27934	16971	17587	48974	53840	15176	15000	44771	43777	48530	49582	68357	67106	8175	8882	8507	11591
106	170.046	18991	17832	39266	40991	33855	38812	69519	70585	94856	91299	38573	39844	85798	84430	23876	22202	36255	43674	38021	36258	12590	14312	45869	45833	21531	20691	25536	33462	17310	18834	25351	31894	42201	38622	23423	24909	19228	24519	27642	29829	28375	27919	28355	26899	24638	22007	13547	15084
107	171.006	45589	43244	102318	97798	65821	59740	21795	29120	15674	15535	59746	55105	90337	91979	53509	55788	119292	117253	389120	364265	80743	75123	39961	42147	49636	51548	55628	53637	106295	97889	101773	97863	33859	33512	104482	100868	235572	233113	249031	260886	322501	333648	113098	109392	29820	30438	64691	58596
108	171.03	44148	41127	80868	94852	73056	75281	71875	71832	86705	85125	79462	92442	79468	79682	62796	61705	105840	121098	91887	98850	47024	48656	53592	54609	41684	47739	64181	68827	62219	62850	63711	63091	53218	59153	71964	67714	103400	120494	114500	106769	97091	105038	85924	85292	58760	63408	47050	40568
109	172.061	69191	74620	93855	102024	207188	209957	385345	386155	503424	526610	238311	237044	459597	461346	44218	42489	107151	110320	492384	487818	40130	33113	299902	296497	229045	247476	208256	217913	25036	27683	90520	93688	207216	202909	60913	65857	148655	158420	290343	281714	221527	238186	68528	66492	79704	81170	42892	44070
110	173.009	192852	201210	262794	302303	236697	254595	208492	191887	188168	191898	239044	267471	136049	137101	475005	495063	554734	582198	289409	304508	199088	170431	235254	234823	195377	207748	239517	247659	214704	216152	377513	361052	229570	240669	245177	231545	292247	310105	479100	484009	237166	235646	259521	259824	190849	215201	150891	160098
111	173.045	60384	59337	209531	217309	161306	171440	411654	374083	326464	340052	190282	180576	292587	301824	87811	89122	208689	223436	520638	522145	73410	73699	221402	249174	98541	99628	154531	165310	73747	69029	133698	141936	154053	157839	141533	154383	181644	178619	404799	462955	575171	612832	174504	167695	87238	86990	64725	68285
112	173.057	30922	32362	47603	49473	52060	54722	107083	106260	192087	207155	55599	58299	188305	185683	29942	31624	46375	47214	80850	79189	44298	53583	56267	63516	39739	40920	49520	49689	29624	31028	32263	33229	49840	51686	39575	39264	38614	38572	72788	74915	87293	85186	40502	39652	54441	53077	54354	54230
113	173.093	140592	158607	87749	80733	366163	367041	266760	280465	389535	422264	421562	420740	425693	451125	127759	122053	144842	140724	79246	80702	66712	73665	320466	332790	233018	254567	288996	275520	71504	69268	268345	273565	302452	321470	54970	61596	99031	98523	93161	97912	99375	100398	59266	60530	158183	157863	110751	109720
114	174.041	13307	11741	25403	29262	31613	30858	79066	78422	164032	187643	37754	36492	135945	145141	17572	13777	30812	32860	35991	36964	35423	39058	37351	42910	46424	45156	28254	28955	14793	13064	19977	21304	32497	34905	18299	20258	20841	21494	37393	40094	41556	44688	23416	23799	47966	48441	38057	36603
115	174.056	17505	17826	38236	39998	35430	33823	42651	42391	84019	79093	39397	45060	61826	61462	26566	24315	31537	32102	44835	42773	22958	19265	26676	28600	34086	35735	36648	35584	30586	31577	19563	21576	34729	31927	34351	34240	24473	22375	31995	33441	39779	36349	35395	35700	26433	27450	30044	32154
116	174.088	14959	13389	112160	117816	45868	43953	116761	126088	177443	173256	39007	38981	208784	218097	15660	14622	51574	52450	98267	102259	20458	20932	63287	67741	22175	24886	35212	35898	13835	15067	29884	31045	53849	54724	81541	88346	32998	30733	78965	83176	97880	104961	100136	104416	18963	22591	28459	28223
117	175.024	40611	40869	545901	543637	107804	104188	200260	182994	182400	188326	92857	103636	140554	138868	51058	50794	279138	266499	391729	441094	49098	43416	97339	95943	67558	73859	88769	96513	72016	68179	157410	153082	93685	101346	286574	280139	87192	84157	538184	528963	807823	879257	318542	335845	84419	79852	40487	43363
118	175.047	15194	11426	206456	208460	25803	26890	399779	448324	1975783	2059079	46279	42180	1816772	1923102	42862	38386	190253	184592	231632	221342	209543	209742	174794	185423	50320	47545	23660	25543	20559	25883	92146	91945	124438	128836	108168	124241	137333	139611	235907	241072	275075	290681	117368	121850	22875	27281	163191	195332
119	175.061	101265	104088	1365958	1459799	231263	228117	424433	461990	436555	485361	241021	238099	408577	435170	167509	162957	341886	348058	1198176	1178418	150984	145162	738239	802346	165002	168041	221652	239070	115532	121599	1094530	1115722	439374	456031	739438	818977	974498	986675	993968	1061785	1337745	1438608	595005	600214	371023	389891	142091	158730
120	177.04	207004	219343	991487	1005992	388914	398878	532700	565609	616788	612468	330931	323261	511769	534137	295282	299497	681923	714012	1216708	1181647	523180	525691	211635	226519	129003	127891	242633	250525	319827	317385	285627	309431	156682	155675	663787	743492	371137	371387	1379363	1470388	1700395	1799477	856266	869165	152238	155272	406842	456836
121	178.051	17267	21793	96892	102757	58622	58435	78211	84641	89707	94944	87456	82262	76016	85610	22435	20533	108880	115691	50026	50098	173574	174704	99489	110692	313976	345308	88267	91338	32508	28283	92484	95715	103846	105706	84288	90120	33558	35294	43149	44002	45439	49110	60096	62497	56533	57637	183879	200198
122	179.038	77426	89595	153722	157932	193509	194312	218305	233508	226243	242763	188815	191058	233329	266582	98248	101729	225877	228210	101912	107883	91980	86088	169150	184976	104909	109215	166963	167406	89536	94389	408719	430902	144581	147661	128001	133545	87351	88907	92428	89460	84212	95875	132356	136948	116902	118910	104712	118587
123	179.056	1321185	1418256	6437045	6775060	9956958	10237156	13023598	13698528	15246719	16160463	9614256	9621759	14763706	15610833	2896270	2799300	7735909	7835948	2991771	2887767	1523015	1439432	9910689	10524549	5297537	5469015	8412037	8872939	1790643	1796245	4320360	4518742	9300887	9636217	6045241	6301057	3110202	3103140	2709697	2763731	2991995	3018170	5504409	5729957	6008538	6262665	1357667	1446357
124	181.051	950947	980456	436453	499247	151246	174689	172682	162657	159178	163560	155641	173940	140152	144514	953046	944037	729011	719850	636069	651871	841319	787230	141768	147370	130632	129893	143905	144153	722040	709764	598574	578217	104220	119260	410302	405111	814218	855835	676013	639293	504484	520869	411227	435272	160838	162545	886271	916262
125	182.97	33195	38265	332964	374027	234088	240869	131157	115281	72946	76863	195528	200733	64559	60255	37005	37097	532052	552053	80091	76130	68817	77332	144768	141317	39900	41497	192110	195076	43117	44209	1008266	981369	142729	143843	270282	239973	87255	96834	74660	70561	59734	55651	341213	371186	89322	98318	61526	79705
126	183.066	31958	31803	64464	64104	70420	72107	64006	65876	71667	70811	65298	70787	81667	83294	33001	36425	61173	66784	48989	51230	44695	41743	60746	68227	45080	44866	74515	69202	39360	37744	48153	50854	57062	55858	57040	56314	34453	38647	39949	44909	40120	42426	55753	57696	39685	43639	45244	46693
127	184.001	42870	44437	356260	366810	194951	196740	382215	366913	187411	194268	198469	194886	195001	219281	105067	97531	683795	693946	329981	321063	150856	193726	418605	434594	86830	84143	166779	166952	84653	81497	432335	427735	383414	381306	405368	399248	447301	444357	209091	206268	249125	250276	409458	400880	115077	106911	55681	53266
128	184.985	34485	40057	138595	148596	84297	87707	101231	103694	60009	68954	94147	92782	95107	108602	80086	86494	149977	158544	195197	206394	70667	67020	102265	108251	100692	100116	85631	88229	82018	84772	142071	150218	85939	107435	137948	138134	150031	154772	165963	185459	181988	185610	114685	112344	84384	87741	48710	78496
129	186.113	32785	30406	21211	22325	26635	25627	25805	24974	29072	28220	25288	26363	26203	28428	16777	17146	26063	23977	34060	36606	16441	16736	22153	24982	17732	18302	27050	24106	22950	24923	32459	31981	18443	19200	21078	19601	17891	18553	29001	27290	33656	30696	20560	22775	16011	17858	44406	46894
130	188.056	71831	66490	352246	376147	328572	331953	1555697	1613592	2618006	2715484	342112	345860	2317419	2391077	85726	81210	124629	129192	313292	311874	49179	41229	933854	944239	77683	73034	220607	233364	101264	101253	68290	72510	794979	820087	292045	294936	131896	134010	282249	285096	338192	361733	276476	283743	188278	184939	37757	45126
131	189.041	86092	88362	72250	70856	61187	59773	114331	117359	114724	121090	75015	74772	105609	107770	45190	48183	53653	57423	58150	61849	28188	26422	58577	56223	47776	44279	51132	49342	44411	37611	32986	35139	51486	54531	48512	48236	31202	33398	55187	54989	72755	72695	53162	53187	67393	72946	29535	35420
132	189.077	1510650	1593393	159798	170169	87938	88287	89950	92663	102385	116072	94499	93536	102966	102373	1150472	1171670	88540	87024	1564557	1573320	60985	47590	113518	117347	57795	57643	77354	82736	39108	36888	119333	123370	93448	94778	87720	90909	1957026	2046530	1607397	1648830	1234048	1274208	115887	111717	100168	99245	56909	58673
133	190.05	15227	15141	47696	43620	191281	188736	29589	35426	39055	40239	135133	124596	43182	43339	18650	18950	23942	24401	31386	34929	13820	14470	30527	32472	22528	25892	134623	143972	24173	29123	18771	20342	29254	31814	36234	39367	17448	15757	19736	18827	20690	17812	32157	36290	20247	21659	18123	17687
134	191.02	7537858	7782275	6707022	6961662	4354272	4417638	2680155	2489338	2961172	2970688	3953740	4042741	3025783	3116841	17233400	17104522	19125738	19264940	11427984	11554196	4598568	4117462	2898997	2767188	3213327	3173800	2976249	3196444	6314273	6884195	10760279	10888235	3279348	3218778	6008486	5900779	14158000	14791999	20839456	20821772	9235548	8954754	5590296	5658035	4235006	4220276	3513879	3764704
135	192.066	31716	33709	74315	84102	72636	74608	127770	144688	265643	291310	77625	80080	209052	217853	67565	64038	154096	155262	146334	153336	45290	46413	83105	96868	98061	100033	69367	72988	92130	98266	66363	62640	74131	76205	62124	66286	76663	78399	144660	144066	123409	127003	68880	70639	54560	65128	126430	131098
136	193.035	70449	69959	117768	120941	114941	117838	181368	159618	276168	279081	118777	119791	288853	315002	77204	75567	289009	286817	186034	201160	106169	118069	96977	108253	81775	90104	91578	95039	50585	47350	136470	137956	106356	110999	77776	85774	89286	92900	160640	162786	202175	203580	85153	78414	110904	107536	97446	104571
137	195.051	5953924	6133147	7319355	7858350	3869918	3929957	7255690	6928380	8081156	8303882	4198837	4359578	6555185	6680742	9896228	9977695	5172591	5193944	4360676	4481639	3379145	3253152	4965693	4811737	2417599	2561572	3642573	3792632	2829838	2869836	3371015	3411668	4151192	4135504	6066242	5882269	4449963	4673374	4408671	4237964	4670390	4566197	6453964	6832599	4348563	4606157	2606158	2635079
138	203.082	142904	147841	386110	406651	612701	629951	180010	188841	314022	330733	1160992	1162796	361162	374978	272200	274647	232597	234361	87182	85889	142281	139794	238409	252931	947551	993067	1157782	1179135	719875	733693	549640	593724	1302081	1344203	347854	355191	70298	67729	55375	57503	60904	49747	555260	584480	1881192	1959173	164354	170400
139	204.052	22360	25560	31430	33223	30656	32218	35043	33009	41281	40964	29298	24895	40286	40969	20116	20278	30182	34423	32148	31188	21006	21404	20381	25591	20833	20260	17920	20924	14812	14491	19141	22392	21394	21925	18349	18631	15775	17156	20644	20159	24749	23567	15107	16822	92218	81685	19033	20426
140	209.03	275302	294995	673842	710151	4110397	4242683	4543937	4439904	6168519	6258413	4693887	4779834	8499483	8692823	703725	633098	415396	405256	1111890	1113185	353391	336518	6322094	6250269	1170764	1175302	4336715	4470096	558321	544432	338865	338213	8117283	8221518	921987	840318	821716	826612	1070226	1007025	1296587	1237460	485101	488646	7354856	7657275	441311	430274
141	211.997	5599	4763	8862	10153	13312	11543	19005	16191	28733	28287	14058	11820	28303	25283	5153	3560	8225	11585	8983	9560	2655	5348	12620	13834	10179	7477	13330	11821	4483	4188	9365	10893	12739	11240	5696	4825	6645	6415	7896	7480	8084	9369	7420	6693	12324	12252	3846	7467
142	212.03	10388	10070	13369	13236	42272	41362	61293	62631	29946	29231	56925	59596	26910	30240	9738	7784	7632	7899	16987	16213	11166	12995	12119	14859	9826	8748	51994	47836	8456	7548	7436	8006	67749	63080	7551	7734	6080	9069	10146	11938	10654	10817	8518	8649	85275	83282	12273	13854
143	212.979	7130	9600	128251	144450	32834	31653	53658	48746	40289	43511	40863	39585	48218	49195	37162	32742	127968	129424	177356	167930	110121	126934	60379	62670	59806	53984	60645	63016	40886	48858	118044	107058	50117	60302	103727	114344	70903	65776	160809	160255	197722	192763	122004	132090	30727	34460	137041	125381
144	213.016	58845	62325	56451	56949	27741	26891	44036	38298	32036	31962	31786	21854	36699	37290	43660	43373	47500	49746	39995	45223	129806	143919	26263	26071	36579	35972	23652	18968	214077	202217	31205	32273	22054	18598	48101	54151	35478	32273	50430	54627	44728	44886	51312	50580	21995	21589	92527	88727
145	213.126	14295	12791	33507	37115	24405	25092	32249	31415	45414	42944	28151	29193	60097	61030	14218	12417	39649	39954	27172	27977	28047	23532	35289	39064	25090	26189	26971	24839	13272	14992	28702	28133	30200	29562	31080	32269	16488	14762	16543	15879	16822	18411	32971	36378	19758	20103	32988	32995
146	214.012	18668	17901	100867	114789	76616	89664	109392	112283	69113	70687	51747	66400	63385	58827	14894	18168	127400	124048	115828	108740	17026	11974	79481	68503	28845	35865	61862	62356	11939	10740	39652	39078	75216	75762	96422	88664	44017	49473	101869	105695	141337	123838	111055	109652	47101	48604	9753	10223
147	214.048	106257	110618	100425	106643	189379	202683	103169	99090	91875	98365	211367	219595	195402	204933	94459	99632	97190	94595	350956	346590	139643	134409	113969	115486	47109	45817	167008	165143	171251	162594	80191	88824	103906	106096	124618	121771	221730	223915	239298	219736	412335	421410	118669	111954	115356	130021	111802	118756
148	215.02	42000	41276	45695	47766	47577	45099	76976	79440	99608	110795	44799	47496	103201	110448	28856	36346	54460	55369	32235	36387	241699	282460	50014	52100	152834	150436	47631	42910	54100	58926	56731	51358	43776	45500	37595	39845	28576	26021	31770	28272	28895	28012	41751	40454	57093	54732	200625	178568
149	215.033	201704	202658	156435	169281	196009	189199	828557	794948	505815	526522	195468	198368	424878	443920	93817	99595	113319	120179	97176	90535	275663	258493	360399	346761	3348013	3524471	228828	219250	356178	349777	80467	81958	296679	285785	181662	179062	51052	50424	80841	81260	115218	109152	169375	184557	355522	370291	241633	261706
150	215.071	38067	40806	27986	30839	33176	32479	55405	51775	55141	55044	34743	37877	49959	45687	31313	36789	31488	35089	23767	25314	46725	43884	41200	41710	138439	142721	41732	34483	38362	35315	26532	26120	34771	41136	23072	23878	20256	22746	23557	19467	24952	24492	24518	27085	579390	583447	62056	58527
151	218.033	24689	23352	46681	45127	50918	58110	81422	88828	69386	77668	43807	52655	69167	74013	21505	20553	58087	59383	70152	74280	24330	26253	37361	33743	101383	98134	40381	43034	23497	20729	34997	27326	29073	27906	30484	34833	23370	24793	58650	56962	65216	67935	38541	40502	28604	27974	23889	26669
152	218.067	37133	37372	3430068	3920085	228777	233283	392296	391804	514487	536673	172871	175981	430464	448907	36670	36858	648504	672758	3125460	3279269	70979	67116	124207	122490	68359	63347	140713	152129	56576	58733	263912	262554	86387	89582	2679865	2602547	492267	533651	2854443	2806174	3339866	3367065	2957972	3172615	121131	125263	38337	42680
153	218.103	117750	115681	269730	287298	129634	132487	255404	252810	487367	499347	146285	157463	419871	427765	118392	117540	82460	84223	740658	768326	75335	70440	150354	151331	74484	76512	159917	162918	42663	44536	80659	84883	191313	195461	183884	181684	504345	518606	441918	426930	574369	583866	196987	205376	252393	266529	75798	85547
154	220.083	23088	22043	47315	44506	29872	33629	47859	48894	61945	66162	32060	33964	56035	63376	18381	16102	28946	31468	74087	71689	14400	10890	28680	30534	20205	23044	31068	30847	13954	15213	16598	17978	28455	29040	35235	34611	15059	16326	55456	55575	73363	72196	39284	40908	31419	31776	10402	12268
155	225.041	57488	60898	51339	49668	76423	80400	82040	88928	87434	87814	71437	71315	85663	93710	48205	46219	58588	64969	40945	39796	42382	48342	61192	59678	67612	66376	57956	61509	38387	41867	34214	35873	51315	48604	35752	33966	30052	28045	30520	28224	34619	38877	39621	39800	63165	73065	44694	54842
156	225.087	34234	30467	83426	86014	48961	50347	55806	61436	73092	73593	54436	51904	60561	67993	25888	27178	38664	40176	52842	56110	38966	40400	61466	62433	59408	54928	52866	49595	28040	28324	26552	29797	60238	60652	53302	51468	28714	29491	40392	42136	45515	46344	54328	57376	76897	79005	55681	61707
157	226.012	23469	25883	36296	41883	44194	47684	122640	116699	150549	151225	47828	52713	112704	119430	26979	25457	27754	31488	43419	45908	27635	28263	95169	92083	28446	26903	37111	37279	24733	23912	23670	20022	82833	86620	26603	25701	25210	23856	38378	35136	38875	36477	26695	30159	28491	27905	25716	26636
158	227.071	40734	40171	34042	33285	33644	33854	36377	37353	38850	43893	36608	34765	37166	37415	37952	37907	37446	37295	32260	34119	92200	89551	29149	30459	44894	47310	29139	32646	104571	105977	45192	48906	22337	27823	25080	30817	30364	29663	32794	36651	33114	35741	30702	31438	99558	88111	80618	81663
159	228.028	22478	25467	25034	21611	20352	23655	27624	24721	27507	25718	19103	25501	26365	26832	15813	18273	15992	20670	19842	21075	19593	18222	20832	20543	15421	19395	17652	19143	27953	27035	12634	13231	15675	15012	11485	14317	9365	9074	13873	15078	14601	13700	18663	17812	11316	11203	21133	21517
160	229.012	73300	74594	141632	143250	101911	105105	100574	106669	69597	69666	95561	89428	96474	101055	76325	75496	183662	182820	162039	156588	85104	83690	92694	102610	124381	125490	71851	72626	61419	61030	128925	142628	119765	119917	81219	84052	100146	107387	120941	131629	131034	132666	105509	105668	88556	92608	71453	69448
161	235.073	50061	43365	79555	85252	98962	91844	86878	95651	99951	104333	123172	117086	91277	98478	31162	32728	60881	61317	75184	76565	39664	47274	94309	99979	73521	79151	111182	118470	37714	35129	51826	49371	116936	114542	64795	71117	54861	58601	65120	69740	67493	77429	69120	68025	91731	93046	48245	45447
162	237.061	203060	211789	266163	287806	356732	373237	581690	586311	843312	860586	405667	434479	690728	720487	200787	201358	381151	373175	432944	438528	181013	170106	396613	407878	281721	318944	329649	337997	156900	169997	219409	219886	335076	344898	213359	205994	306523	325058	348164	348845	389372	399289	233277	244984	383396	425266	162451	166462
163	238.094	33140	35250	23677	25629	30919	31293	23927	24317	31675	34953	17864	16175	30102	28546	10784	10908	14961	15119	24000	21400	11108	12328	20000	18408	20001	21693	15814	17235	14618	15573	12377	11989	16232	19201	14568	14489	11019	11803	16828	15894	22493	21563	16656	14980	444913	470271	19712	20088
164	243.027	358839	382572	65671	67091	114252	118063	138994	143915	115870	124615	105412	111897	121080	120041	297228	304519	143325	131504	274819	277870	205384	193287	99053	98250	69482	70202	79133	81506	42201	37890	143021	144466	83213	85640	46062	49964	634467	647271	305390	306927	218995	220017	52619	55143	70252	77302	298638	325663
165	243.062	73804	77785	223399	243150	558029	566972	862029	891963	584073	595037	509732	525766	584197	630971	124621	117586	106380	104217	311694	323285	72835	68724	689477	722623	110828	109538	542116	550249	77873	77098	89006	95957	845577	876708	334413	346814	310960	314013	172550	172696	176303	188375	247961	277610	382152	394898	83888	90719
166	253.051	5662959	6071104	6798964	7413528	22423420	23771216	15080549	14678094	15139268	15786371	23652074	24954378	12825093	13154235	4205647	4214186	10881232	11083982	7455339	7793772	13782217	13331615	28832428	30661398	30420918	32274852	24047114	25234330	13343006	13500256	10745897	11184070	28152432	29813974	7518559	7216327	9886807	10298228	5471583	5299033	3915819	4064981	6122417	6326757	36495896	38821176	14484460	15154598
167	255.233	20866700	21702088	15744621	16420526	12030330	12326729	14497452	14662210	13550516	13875812	14034866	14427412	10683664	10607577	20364088	20974736	16533573	16963700	15326955	15599482	13631332	12799856	12818799	13363935	15387251	15808551	12068202	12221160	15969170	16166879	14659291	14848930	13904023	14349461	19130298	19760720	17228758	17660302	13507732	13725284	13141103	13422323	18453600	19098554	17484460	18087530	13580808	14214934
168	258.039	31828	29373	30058	32058	70685	66658	33176	33848	49608	52112	60252	60990	62904	61296	25840	24392	30771	33987	51032	54200	19484	21097	22395	24585	23773	26913	42677	42172	21558	19811	31225	30019	20052	20775	18626	20594	36614	40759	40621	38400	46353	49983	18579	20272	28369	28627	20759	22780
169	259.023	542330	557308	1291655	1337919	1061465	1073668	608691	602875	498191	520485	1165095	1195226	1099711	1130574	755969	760066	2002930	2007749	1504155	1539647	601366	570107	773653	758901	1276702	1355425	847366	854186	736490	713257	1418546	1402650	990341	1026875	897822	879905	918836	974501	1455147	1394591	1333188	1323804	1193372	1246447	1167143	1224582	503614	511397
170	260.114	12633	13486	32947	32557	95407	104696	287153	277749	689615	726422	100704	106486	647364	659835	21456	20611	25191	23110	60646	58412	25502	25329	92082	90080	18142	20736	85887	80674	73437	72398	21660	22595	92298	94249	20545	21016	12791	11413	53431	56818	50115	52136	33560	36512	62622	68731	45203	44657
171	264.951	20898	20979	18282	19211	24782	24349	16704	16370	12595	11045	20076	21952	13690	10911	27819	27970	25768	28761	26907	28747	23526	26949	22109	18540	21401	25030	18975	20533	30520	23242	32259	32587	19339	18347	13844	14933	21808	19745	25280	27153	19281	22489	19388	18915	16794	18720	24536	26649
172	267.073	972949	1010528	721434	741576	567656	587916	843978	859636	1178842	1267679	531615	544137	991448	1007046	1069735	1094968	474089	486919	1260639	1277415	521238	544977	535485	564501	1552877	1575590	528656	550915	486225	477210	248054	245610	497654	498027	556164	574999	412477	420505	952387	954103	1085615	1136304	657007	642904	879940	932716	412133	412063
173	277.123	25438	24225	135808	153299	85040	76944	148467	155154	134354	148209	71508	79045	121583	115250	7248	5637	112284	119440	221619	235348	8829	5995	86837	91776	46232	46460	77151	73342	17387	19971	84291	83741	79799	83865	99322	100112	82278	88511	134442	134768	154319	166571	133021	133265	45833	47635	24165	23998
174	282.084	43363	47601	284157	281593	189870	204355	357181	343930	180059	193993	195168	196248	224158	230177	65565	68778	100427	104551	217664	209326	25887	29751	184127	191056	56792	50827	149981	144995	46405	53689	80847	85500	200507	203692	274080	259281	185794	188478	144559	143561	156241	165142	257496	262333	104493	101562	29856	28358
175	283.205	20945	18249	14871	14883	15011	16145	15687	18945	19179	19192	16544	16795	23100	22617	14344	16427	18815	14352	11955	13715	14763	9886	19406	21119	14465	15908	14271	16405	15794	13882	17515	18733	18652	16054	14990	17625	14913	14776	13041	11877	12640	14488	14600	17998	19264	18609	25848	30828
176	289.116	39517	41167	182034	199423	95939	92805	220022	223745	243683	248712	78887	76185	218245	228157	63435	59649	158143	156019	264174	272040	24234	23889	81249	81793	24761	25570	59686	69345	28470	28237	46647	49090	65026	62825	122409	123536	75471	80322	234658	232618	340916	338582	151208	152533	37468	33740	23549	25808
177	292.104	23938	22440	78406	84092	39911	40671	43256	49556	72442	77494	37210	35127	66653	71945	23661	21628	38795	37032	75360	76909	12514	8281	26771	27041	10316	10248	29807	30753	23315	22520	21443	20445	22823	23335	58338	60944	20678	19784	62371	60741	69768	66335	66164	63551	75638	73625	12478	14964
178	293.212	1369569	1429531	2517970	2588493	9427678	9531234	7507772	7611064	7610343	7941795	8088627	8131584	9443846	9724931	1137792	1112242	3481204	3557929	3046525	3102997	700713	670086	5853281	6011473	2170279	2227134	5751253	5546606	763600	754856	1373234	1439214	4113475	4125549	2272249	2306223	3340410	3387387	2564523	2555000	2960540	2990542	2191040	2211723	7075501	7136056	776311	811017
179	295.228	398733	388389	2058554	2058853	7531745	7588298	6957406	7104396	6972903	7271756	5302830	5221025	8206251	8441486	466527	447710	2716652	2780201	2051710	2121972	300627	279757	5422090	5620985	547846	527665	3677829	3487047	261730	257537	793366	809748	3237153	3229114	1922061	2020104	1682549	1718533	1497435	1488911	2009920	2046799	1811956	1835149	2349844	2414853	211629	216577
180	298	9899	7476	17102	20015	10767	11299	21845	22531	22242	26416	12409	13327	19486	22903	8023	10122	30049	29362	37858	40586	11119	8741	15563	14786	9804	10862	9428	10367	6298	6906	13589	14936	12914	12223	12607	11918	10059	11718	24441	26729	27388	26862	16945	20042	9922	9248	7922	7599
181	298.069	57278	54050	36576	32611	46937	50569	74045	69854	110926	115442	52919	54973	98105	102240	43712	45419	49965	50090	34182	38300	26138	31797	38111	40800	24688	25574	45327	48194	37531	40124	25147	24791	37708	35390	20780	22206	31023	32910	30547	31914	31427	32811	22901	25182	51854	46175	28097	27784
182	300.05	162608	165610	77353	85921	153992	166159	220242	229475	362423	383307	172420	171923	284519	287625	152091	155902	87840	92251	146986	142692	109533	111829	153629	157728	152127	161698	175548	157564	97160	96794	65636	77231	207750	201780	60079	52594	95823	98730	149047	154445	145324	143863	61025	56932	327505	331363	79446	84968
183	306.049	23979	20446	20356	23916	34377	36457	32538	34255	32599	30767	43960	39927	30231	30493	17968	19249	19133	20966	17978	17150	16342	16295	34855	41031	26840	26728	39059	43899	15244	13827	15165	14709	35028	36874	15817	16832	13163	11587	12369	11984	13351	15774	14186	15288	55896	52597	17462	14169
184	312.059	497893	547064	51432	50736	47719	46694	52348	52824	50877	57022	53541	49507	71598	75881	92739	103732	34398	35850	43439	47131	53124	53569	65075	62609	66988	69502	38745	34817	156894	160299	25026	27650	53445	47842	40213	39508	160358	168664	94173	98552	50121	48736	29965	31160	114549	121247	44153	47173
185	317.029	42433	46868	49901	52680	44939	42766	49877	54576	57018	58367	44713	45975	58333	56455	40110	42299	39161	36907	41694	40437	31563	33709	44917	42701	91968	89314	37117	39726	47463	57618	34548	35212	35504	41741	26685	27018	26499	27683	34060	33235	39608	42888	35216	32772	51188	55255	28972	28643
186	322.045	35995	37713	144931	143054	29684	30718	38977	44383	51758	53944	27677	27070	52160	57880	34494	40528	176129	178994	62778	60428	25150	23773	28054	27921	46022	45099	22641	22688	37540	39469	128901	128509	23591	26949	92490	100012	39505	39005	45927	48787	57145	62856	102799	104009	49091	53706	25137	26648
187	323.029	93624	102629	545719	564133	62624	61873	49844	55763	52198	54805	60520	57118	60316	60387	130477	129187	794459	809663	201352	206098	88802	90803	41358	39516	136926	139404	40519	37324	101183	106407	671307	687609	42119	40993	372271	395556	180182	172959	152257	141340	182256	180376	457310	474023	136559	127447	68738	75734
188	325.094	189911	189168	68200	69610	92491	92700	93184	96603	106570	110257	86859	85898	98385	96100	112753	114747	68798	72396	213643	217098	48278	46057	61281	67277	38152	40991	73934	71845	59070	60003	74324	80070	49324	58181	53047	54339	76208	77491	144492	149857	137942	133832	54317	56466	106485	101689	46454	49205
189	331.046	76391	71849	63317	68671	55212	65572	64566	66736	68014	69230	58616	61744	69122	68061	52881	53084	46024	45887	58962	63188	49070	46959	55883	57607	103020	96734	58108	57889	61995	64310	36189	33552	51004	53846	48458	50803	46919	44920	53210	52848	56838	59102	55282	57051	51778	59842	50405	50047
190	335.04	163688	174849	53542	60331	56225	53592	57821	58866	67008	65166	58236	61240	68211	65619	104141	106112	37370	40378	41311	39839	77014	74693	51805	55987	80439	82285	48019	51666	43231	41975	20050	24375	39657	45188	28259	34094	35088	32557	37213	34212	36249	35976	37680	38517	56549	56577	42053	39579
191	338.038	20097	20488	18782	19096	20920	20777	40545	41199	42859	43517	19020	20987	51586	56594	16446	16577	16143	16727	17099	20263	15417	12516	14959	18470	17598	20438	14202	15285	13497	12498	10780	11641	13639	14571	10496	12101	11034	10102	16307	16628	17935	14836	13252	13530	20323	18488	11290	11219
192	338.989	25254	22575	45563	47039	39803	43112	41745	40870	43646	56336	45828	40812	93720	96664	32556	29413	50518	45181	42420	43512	47432	40647	48392	48561	44140	43259	44386	36576	37824	44718	101843	97167	55154	50389	54604	52915	59310	55810	35148	34473	46836	45881	45666	43151	107057	98480	63816	61277
193	341.11	21194752	22054564	35715200	38827868	27878062	29436354	31470812	33047234	15600093	15969000	28739064	30830584	14583469	15268427	24664368	26278946	25626886	27304318	28031844	29726354	19099518	19019384	23668556	25376116	16544598	17278362	26151590	27764796	21248418	22123108	21760852	23299796	23279052	24554976	34463608	37843508	25099414	25948538	28119492	29610914	32911674	36038268	32309252	34159116	26235446	27382876	15836992	16438773
194	344.04	28569	25012	43004	44717	37355	37542	54739	50468	78712	76169	41984	35884	76800	77036	27881	25127	30573	32046	41620	43012	20075	16316	29693	32387	37689	37131	27539	26084	26132	27816	18916	17673	22466	21614	24044	19023	19011	17669	34366	34163	32505	36219	29653	33399	30031	31422	25783	33569
195	344.07	37290	39473	27596	25763	33375	33103	39714	38078	46362	48416	35958	39401	50591	46764	41259	41913	21506	22501	34721	35854	65906	60795	29866	36407	31123	26594	31830	30450	50145	51790	15638	15661	25113	24740	22793	21295	14516	12607	30405	31444	33966	35421	21668	22525	39828	45049	38439	39753
196	346.056	134613	132053	717020	737454	105032	105198	80822	82541	142258	137067	81247	81909	134469	134978	112774	110370	1582889	1601988	231584	228363	83382	80144	76047	73885	75947	86530	52581	51209	218935	211500	1513606	1553279	86238	80186	263747	259521	181037	187504	204776	205019	249724	261100	390095	401049	69660	69929	70335	70535
197	348.087	32924	31785	30534	29970	30333	29157	37865	35580	39303	42236	26478	26250	41080	44612	26532	25649	20110	18807	28555	29758	14836	15757	24800	23570	69354	72715	21179	23756	46993	46056	15698	16251	18970	18583	23747	21603	14918	15841	18936	18796	27355	27829	19978	20998	28835	29405	14463	16127
198	354.001	5123	5612	10918	11241	10117	9552	10573	12766	11846	12146	10980	9398	13049	12723	4698	4534	16042	15417	23699	22862	3970	5216	9375	10959	13415	12140	8833	8864	4493	3443	9674	11068	8524	7573	6007	7790	6971	9085	30041	30575	24786	26323	8241	11022	13678	14427	2575	2073
199	362.051	23850	25565	95262	92183	25344	24535	24940	26927	30618	31645	31516	28647	30868	32872	22238	20974	220817	220969	36365	36636	23063	22326	24776	27303	36068	35622	13756	17613	34573	36919	209696	206530	26015	25305	43841	43876	22454	23585	24920	25468	30227	32802	61707	64771	20865	22194	29307	31030
200	363.035	38702	36554	42035	45147	45171	42155	49340	48348	60851	66674	43970	44822	55990	61324	37338	34498	39142	40190	39702	44782	38022	35670	45375	44184	218355	214671	39145	38992	37392	36655	31320	34126	40253	42221	27209	26617	23808	24111	38994	39859	38109	43651	30936	30038	92022	97514	37959	37172
201	363.217	28918	26404	27663	29959	50957	50600	38548	42776	45048	51682	62655	64583	51576	51257	36057	37544	21752	21727	39124	35006	15299	14485	45189	50396	30709	28837	54836	50770	25015	23006	20080	18624	40991	41801	27190	26791	40048	40825	28747	30706	32140	35189	25186	26107	51934	53569	28462	30493
202	367.249	42143	46212	43882	42098	154862	169272	114247	119115	184241	185847	143715	150481	44781	42784	41578	43248	38055	40533	92015	92639	16243	17616	137954	142493	89123	85915	131982	135502	40199	35473	34304	33093	123875	123010	46772	48183	148907	149642	72734	72735	82800	81926	37039	39805	202191	205754	33434	35563
203	375.13	31266	32699	62374	66463	159834	177422	270910	287737	245358	256127	193164	196852	218695	223113	28942	30302	111006	107761	156455	165690	18812	18959	186232	193392	393428	383590	150456	144742	25010	24173	59878	65549	146259	143220	51081	53242	37276	36461	120216	125573	172524	189003	52136	57704	166516	168580	21852	25195
204	379.013	37780	37180	39010	40531	37657	35856	42460	43151	35762	38660	39746	37529	37594	37577	38235	37176	27399	26558	49329	52759	48052	44986	27091	27520	38580	39418	30777	34197	36191	40571	23517	23695	20841	24157	37149	42768	34613	31415	49462	45760	39837	38142	34515	37386	26561	30461	34525	36274
205	388.067	16043	14575	23038	26158	16197	13279	17676	21307	26932	25481	16867	12760	27525	27774	18885	24110	13673	15104	23110	25211	10771	11038	13294	12890	12827	13498	11476	11095	12086	10596	10249	11418	10370	9388	12319	13145	6807	8120	16655	18040	21967	23462	17878	17324	14222	17603	8708	9863
206	402.011	12183	13111	32006	37225	13895	15987	16787	19219	21329	19397	14742	14823	23088	20523	16940	13942	25008	28887	61051	68326	17623	15327	15321	14544	19112	19679	8268	13297	15404	14847	35429	30977	14672	13224	12329	14058	31171	31489	50973	49949	66703	70094	22830	20827	14908	14692	11339	14027
207	402.995	25319	29039	114940	124420	46379	48497	45907	47127	40624	36238	42651	42424	26441	28783	37917	35733	88544	89413	162834	168351	39755	37851	38729	41069	64740	66786	27737	30136	26464	32184	69101	67993	33877	34575	49575	49136	85119	95083	134936	139032	142473	147667	68813	67639	38700	34842	34280	29790
208	421.077	555440	538188	378177	385272	411801	416094	481674	479399	278565	302270	391106	396633	308083	309511	1235845	1204754	249963	244170	398240	402671	133236	136212	211644	219779	207279	210825	280843	252637	220420	220084	247427	256361	231775	239674	432805	435663	327448	339221	455146	450870	472678	460760	324111	330183	174951	180482	96328	104094
209	426.022	31977	34435	496648	529592	88287	83541	78870	77819	89978	92530	66198	65699	68470	69791	41843	44498	289435	309276	324359	342835	92623	80340	59503	59956	101701	103079	33173	36462	53761	62202	394552	419738	55407	53608	178945	188054	199805	200270	321827	336362	449361	479572	245549	251544	88350	79889	65698	66946
210	442.017	7875	7259	24519	26259	13037	12617	17321	13946	16967	21648	11941	12877	19606	19405	10431	10787	20483	25935	30198	30382	9641	9827	16523	14415	11853	11932	10473	10596	9776	9638	17080	19606	11378	13525	12588	13268	19277	20526	30416	28756	25874	26322	18525	18799	9099	9082	7697	8486
211	455.156	62313	60881	93919	92673	175473	179908	523914	543538	1914747	1983671	231099	245638	1260991	1298724	82250	74493	38852	38543	34785	39805	28047	29986	161205	158478	4980540	5071480	355417	334607	53262	52530	29698	33114	110797	115457	95125	104988	23885	24133	33444	35363	52323	58576	62582	67194	317049	332594	31872	33395
212	472.159	39339	37504	54155	59394	54680	55064	73052	70121	89697	86890	56175	57206	83742	82605	29953	29979	39449	35263	107619	114070	25575	27143	41737	40075	28930	33012	51189	49188	26446	26316	19228	18188	36661	34825	32542	39193	37810	44390	86988	88183	126050	128362	33149	37510	57116	57914	23929	24528
213	482.962	9642	10840	12258	16056	9880	10277	12038	13910	12984	12178	15402	16055	10663	11510	14013	14247	16799	16628	36050	39161	30455	29537	14861	15478	46031	54412	13201	12665	17790	22957	15812	16552	11468	14238	10848	11015	40823	45381	45811	45541	40654	40793	16679	14088	15339	12419	29638	31644
214	490.976	20890	22180	23091	23012	14438	16090	16873	14898	19024	18382	17048	15770	16587	14819	19256	21081	18632	21103	23384	25604	21497	21116	14920	15048	16458	18801	17624	18014	27698	26359	18441	18092	15274	16022	19152	24400	20483	22611	21428	24679	22223	25052	22559	22812	15621	16447	24525	21852
215	535.037	58346	58336	110675	116850	40764	40083	33906	34921	27848	27591	37572	40406	33189	31489	50353	49071	101756	104124	94877	94396	58676	53024	24086	23738	54908	52729	26538	26768	71944	73286	100422	97045	25951	22045	98398	101071	59008	55027	67331	65831	78216	79431	96048	94878	37125	33257	36109	36785
216	561.252	31243	30570	33336	28800	66196	62006	57543	55910	64371	72444	65585	72240	64909	61279	29406	27030	20985	20797	29145	24214	22419	20625	47038	51177	51993	58562	61209	63785	20431	18499	22949	26737	46982	48147	27697	28902	31822	35389	27609	30104	35447	31599	23911	24399	70153	67669	23926	21704
217	565.048	106032	117817	634751	627272	293995	308533	131657	136618	79388	80547	282160	278460	104043	97695	108140	104727	757021	754151	469767	490349	170785	170029	62098	59945	425932	429963	89679	82819	209236	218886	672071	660720	50013	50372	313657	316810	292662	315245	368035	374573	413843	421547	373868	391046	206913	205456	144108	143368
218	579.026	23473	21667	69260	62434	53105	52374	49120	51842	36217	36291	45695	48613	22257	24990	23998	23882	68370	66380	67972	57738	20575	21176	32508	33634	33122	30412	30832	28540	23083	25944	59007	53257	30521	29362	52631	57452	39893	40431	57071	55613	58099	55242	53857	52170	34168	33553	17048	16181
219	588.075	8246	8928	22791	23117	5033	7488	10627	10377	9802	11896	5392	6746	18484	19319	8771	6994	14596	14526	11723	11914	5812	5051	7929	6935	10301	9440	5497	4576	7690	6021	10495	12276	6319	6371	12369	14392	7901	8660	12303	10229	9983	11894	14230	15626	8746	9260	6948	7589
220	604.069	8375	7850	37491	41034	16891	13507	22578	21495	25202	27772	17677	16530	22299	20468	5180	6088	39134	39539	22903	22161	8881	8109	17593	15092	15752	16606	19698	15699	8360	8256	27078	26503	14012	12415	41962	36284	12636	11399	21384	19870	25673	22985	59604	54118	15090	15551	7321	8087
221	606.075	22595	21449	83354	79426	64131	65890	95403	94422	86527	87470	64105	64886	59500	57089	17319	15606	71743	69096	65787	65882	35700	32996	44683	43675	97280	95206	39389	33703	56342	62443	58034	61722	40930	36713	59160	60328	40377	38464	55682	53258	64650	66051	63883	62737	93714	93228	26842	27056
222	702.248	36765	35733	13295	15566	38460	39370	61842	65215	49975	52537	52255	48312	46472	46178	15263	14948	6651	5976	8956	10220	13256	13042	26082	29411	13511	15617	39486	44837	8912	7965	5012	3663	26927	23974	10866	9795	7178	6357	5694	7157	10309	9149	9344	10123	29446	31949	11668	12112
223	716.264	14380	12575	14270	11032	24160	25636	34029	37882	29429	28818	31102	31473	28211	27602	15232	13412	5177	8986	8932	8858	17396	18028	12331	11900	3327	6009	18787	22372	7975	7156	3496	3572	9697	9855	7987	9198	5673	8839	8338	8225	12412	11491	9636	8706	37081	36459	12424	13793
224	990.286	4433	4730	33559	32420	44125	47181	33803	36245	19609	20691	38421	35756	22638	25082	590	927	16962	16944	23046	25914	1134	1179	22907	19646	2343	1299	35999	38361	2543	2274	10090	12027	15561	16164	25183	25975	11324	13074	17642	17553	24889	24082	24349	24292	8727	7790	925	2231
[truncated: 46 more columns]

## Sheet: stdev1
ionIdx	ionMz	01 / siratro roots roots 31dpi	02 / siratro roots roots 31dpi	03 / cowpea nodules wt 21dpi	04 / cowpea nodules wt 21dpi	05 / soybean nodules deltaNifH 21dpi	06 / soybean nodules deltaNifH 21dpi	07 / soybean nodules wt 21dpi	08 / soybean nodules wt 21dpi	09 / soybean nodules wt 31dpi	10 / soybean nodules wt 31dpi	11 / soybean nodules deltaNifH 21dpi	12 / soybean nodules deltaNifH 21dpi	13 / soybean nodules wt 31dpi	14 / soybean nodules wt 31dpi	15 / siratro roots roots 31dpi	16 / siratro roots roots 31dpi	17 / mungbean nodules wt 21dpi	18 / mungbean nodules wt 21dpi	19 / siratro nodules wt 31dpi	20 / siratro nodules wt 31dpi	21 / mungbean roots roots 21dpi	22 / mungbean roots roots 21dpi	23 / soybean nodules wt 13dpi	24 / soybean nodules wt 13dpi	25 / soybean roots roots 21dpi	26 / soybean roots roots 21dpi	27 / soybean nodules deltaNifH 21dpi	28 / soybean nodules deltaNifH 21dpi	29 / cowpea roots roots 21dpi	30 / cowpea roots roots 21dpi	31 / mungbean nodules deltaTyr 21dpi	32 / mungbean nodules deltaTyr 21dpi	33 / soybean nodules wt 13dpi	34 / soybean nodules wt 13dpi	35 / cowpea nodules deltaTyr 21dpi	36 / cowpea nodules deltaTyr 21dpi	37 / siratro nodules deltaTyr 31dpi	38 / siratro nodules deltaTyr 31dpi	39 / siratro nodules wt 31dpi	40 / siratro nodules wt 31dpi	41 / siratro nodules wt 31dpi	42 / siratro nodules wt 31dpi	43 / cowpea nodules wt 21dpi	44 / cowpea nodules wt 21dpi	45 / soybean nodules deltaNifA 21dpi	46 / soybean nodules deltaNifA 21dpi	47 / mungbean roots roots 21dpi	48 / mungbean roots roots 21dpi
1	55.0189	0	0	0	0	0	0	0	0	0	0	0	0	0	0	0	0	0	0	0	0	0	0	0	0	0	0	0	0	0	0	0	0	0	0	0	0	0	0	0	0	0	0	0	0	0	0	0	0
2	57.0346	0	0	0	0	0	0	0	0	0	0	0	0	0	0	0	0	0	0	0	0	0	0	0	0	0	0	0	0	0	0	0	0	0	0	0	0	0	0	0	0	0	0	0	0	0	0	0	0
3	59.0134	0	0	0	0	0	0	0	0	0	0	0	0	0	0	0	0	0	0	0	0	0	0	0	0	0	0	0	0	0	0	0	0	0	0	0	0	0	0	0	0	0	0	0	0	0	0	0	0
4	70.03	0	0	0	0	0	0	0	0	0	0	0	0	0	0	0	0	0	0	0	0	0	0	0	0	0	0	0	0	0	0	0	0	0	0	0	0	0	0	0	0	0	0	0	0	0	0	0	0
5	71.014	0	0	0	0	0	0	0	0	0	0	0	0	0	0	0	0	0	0	0	0	0	0	0	0	0	0	0	0	0	0	0	0	0	0	0	0	0	0	0	0	0	0	0	0	0	0	0	0
6	72.0093	0	0	0	0	0	0	0	0	0	0	0	0	0	0	0	0	0	0	0	0	0	0	0	0	0	0	0	0	0	0	0	0	0	0	0	0	0	0	0	0	0	0	0	0	0	0	0	0
7	72.9934	0	0	0	0	0	0	0	0	0	0	0	0	0	0	0	0	0	0	0	0	0	0	0	0	0	0	0	0	0	0	0	0	0	0	0	0	0	0	0	0	0	0	0	0	0	0	0	0
8	73.0294	0	0	0	0	0	0	0	0	0	0	0	0	0	0	0	0	0	0	0	0	0	0	0	0	0	0	0	0	0	0	0	0	0	0	0	0	0	0	0	0	0	0	0	0	0	0	0	0
9	74.0248	0	0	0	0	0	0	0	0	0	0	0	0	0	0	0	0	0	0	0	0	0	0	0	0	0	0	0	0	0	0	0	0	0	0	0	0	0	0	0	0	0	0	0	0	0	0	0	0
10	75.0089	0	0	0	0	0	0	0	0	0	0	0	0	0	0	0	0	0	0	0	0	0	0	0	0	0	0	0	0	0	0	0	0	0	0	0	0	0	0	0	0	0	0	0	0	0	0	0	0
11	87.0087	0	0	0	0	0	0	0	0	0	0	0	0	0	0	0	0	0	0	0	0	0	0	0	0	0	0	0	0	0	0	0	0	0	0	0	0	0	0	0	0	0	0	0	0	0	0	0	0
12	87.0451	0	0	0	0	0	0	0	0	0	0	0	0	0	0	0	0	0	0	0	0	0	0	0	0	0	0	0	0	0	0	0	0	0	0	0	0	0	0	0	0	0	0	0	0	0	0	0	0
13	88.9881	0	0	0	0	0	0	0	0	0	0	0	0	0	0	0	0	0	0	0	0	0	0	0	0	0	0	0	0	0	0	0	0	0	0	0	0	0	0	0	0	0	0	0	0	0	0	0	0
14	89.0244	0	0	0	0	0	0	0	0	0	0	0	0	0	0	0	0	0	0	0	0	0	0	0	0	0	0	0	0	0	0	0	0	0	0	0	0	0	0	0	0	0	0	0	0	0	0	0	0
15	91.0399	0	0	0	0	0	0	0	0	0	0	0	0	0	0	0	0	0	0	0	0	0	0	0	0	0	0	0	0	0	0	0	0	0	0	0	0	0	0	0	0	0	0	0	0	0	0	0	0
16	93.0344	0	0	0	0	0	0	0	0	0	0	0	0	0	0	0	0	0	0	0	0	0	0	0	0	0	0	0	0	0	0	0	0	0	0	0	0	0	0	0	0	0	0	0	0	0	0	0	0
17	95.0139	0	0	0	0	0	0	0	0	0	0	0	0	0	0	0	0	0	0	0	0	0	0	0	0	0	0	0	0	0	0	0	0	0	0	0	0	0	0	0	0	0	0	0	0	0	0	0	0
18	100.04	0	0	0	0	0	0	0	0	0	0	0	0	0	0	0	0	0	0	0	0	0	0	0	0	0	0	0	0	0	0	0	0	0	0	0	0	0	0	0	0	0	0	0	0	0	0	0	0
19	101.025	0	0	0	0	0	0	0	0	0	0	0	0	0	0	0	0	0	0	0	0	0	0	0	0	0	0	0	0	0	0	0	0	0	0	0	0	0	0	0	0	0	0	0	0	0	0	0	0
20	102.056	0	0	0	0	0	0	0	0	0	0	0	0	0	0	0	0	0	0	0	0	0	0	0	0	0	0	0	0	0	0	0	0	0	0	0	0	0	0	0	0	0	0	0	0	0	0	0	0
21	103.003	0	0	0	0	0	0	0	0	0	0	0	0	0	0	0	0	0	0	0	0	0	0	0	0	0	0	0	0	0	0	0	0	0	0	0	0	0	0	0	0	0	0	0	0	0	0	0	0
22	103.016	0	0	0	0	0	0	0	0	0	0	0	0	0	0	0	0	0	0	0	0	0	0	0	0	0	0	0	0	0	0	0	0	0	0	0	0	0	0	0	0	0	0	0	0	0	0	0	0
23	103.04	0	0	0	0	0	0	0	0	0	0	0	0	0	0	0	0	0	0	0	0	0	0	0	0	0	0	0	0	0	0	0	0	0	0	0	0	0	0	0	0	0	0	0	0	0	0	0	0
24	104.035	0	0	0	0	0	0	0	0	0	0	0	0	0	0	0	0	0	0	0	0	0	0	0	0	0	0	0	0	0	0	0	0	0	0	0	0	0	0	0	0	0	0	0	0	0	0	0	0
25	109.03	0	0	0	0	0	0	0	0	0	0	0	0	0	0	0	0	0	0	0	0	0	0	0	0	0	0	0	0	0	0	0	0	0	0	0	0	0	0	0	0	0	0	0	0	0	0	0	0
26	109.041	0	0	0	0	0	0	0	0	0	0	0	0	0	0	0	0	0	0	0	0	0	0	0	0	0	0	0	0	0	0	0	0	0	0	0	0	0	0	0	0	0	0	0	0	0	0	0	0
27	111.009	0	0	0	0	0	0	0	0	0	0	0	0	0	0	0	0	0	0	0	0	0	0	0	0	0	0	0	0	0	0	0	0	0	0	0	0	0	0	0	0	0	0	0	0	0	0	0	0
28	111.021	0	0	0	0	0	0	0	0	0	0	0	0	0	0	0	0	0	0	0	0	0	0	0	0	0	0	0	0	0	0	0	0	0	0	0	0	0	0	0	0	0	0	0	0	0	0	0	0
29	113.025	0	0	0	0	0	0	0	0	0	0	0	0	0	0	0	0	0	0	0	0	0	0	0	0	0	0	0	0	0	0	0	0	0	0	0	0	0	0	0	0	0	0	0	0	0	0	0	0
30	113.036	0	0	0	0	0	0	0	0	0	0	0	0	0	0	0	0	0	0	0	0	0	0	0	0	0	0	0	0	0	0	0	0	0	0	0	0	0	0	0	0	0	0	0	0	0	0	0	0
31	114.056	0	0	0	0	0	0	0	0	0	0	0	0	0	0	0	0	0	0	0	0	0	0	0	0	0	0	0	0	0	0	0	0	0	0	0	0	0	0	0	0	0	0	0	0	0	0	0	0
32	115.004	0	0	0	0	0	0	0	0	0	0	0	0	0	0	0	0	0	0	0	0	0	0	0	0	0	0	0	0	0	0	0	0	0	0	0	0	0	0	0	0	0	0	0	0	0	0	0	0
33	116.035	0	0	0	0	0	0	0	0	0	0	0	0	0	0	0	0	0	0	0	0	0	0	0	0	0	0	0	0	0	0	0	0	0	0	0	0	0	0	0	0	0	0	0	0	0	0	0	0
34	116.072	0	0	0	0	0	0	0	0	0	0	0	0	0	0	0	0	0	0	0	0	0	0	0	0	0	0	0	0	0	0	0	0	0	0	0	0	0	0	0	0	0	0	0	0	0	0	0	0
35	117.019	0	0	0	0	0	0	0	0	0	0	0	0	0	0	0	0	0	0	0	0	0	0	0	0	0	0	0	0	0	0	0	0	0	0	0	0	0	0	0	0	0	0	0	0	0	0	0	0
36	118.051	0	0	0	0	0	0	0	0	0	0	0	0	0	0	0	0	0	0	0	0	0	0	0	0	0	0	0	0	0	0	0	0	0	0	0	0	0	0	0	0	0	0	0	0	0	0	0	0
37	118.981	0	0	0	0	0	0	0	0	0	0	0	0	0	0	0	0	0	0	0	0	0	0	0	0	0	0	0	0	0	0	0	0	0	0	0	0	0	0	0	0	0	0	0	0	0	0	0	0
38	119.05	0	0	0	0	0	0	0	0	0	0	0	0	0	0	0	0	0	0	0	0	0	0	0	0	0	0	0	0	0	0	0	0	0	0	0	0	0	0	0	0	0	0	0	0	0	0	0	0
39	120.045	0	0	0	0	0	0	0	0	0	0	0	0	0	0	0	0	0	0	0	0	0	0	0	0	0	0	0	0	0	0	0	0	0	0	0	0	0	0	0	0	0	0	0	0	0	0	0	0
40	121.03	0	0	0	0	0	0	0	0	0	0	0	0	0	0	0	0	0	0	0	0	0	0	0	0	0	0	0	0	0	0	0	0	0	0	0	0	0	0	0	0	0	0	0	0	0	0	0	0
41	121.041	0	0	0	0	0	0	0	0	0	0	0	0	0	0	0	0	0	0	0	0	0	0	0	0	0	0	0	0	0	0	0	0	0	0	0	0	0	0	0	0	0	0	0	0	0	0	0	0
42	125.024	0	0	0	0	0	0	0	0	0	0	0	0	0	0	0	0	0	0	0	0	0	0	0	0	0	0	0	0	0	0	0	0	0	0	0	0	0	0	0	0	0	0	0	0	0	0	0	0
43	125.036	0	0	0	0	0	0	0	0	0	0	0	0	0	0	0	0	0	0	0	0	0	0	0	0	0	0	0	0	0	0	0	0	0	0	0	0	0	0	0	0	0	0	0	0	0	0	0	0
44	126.092	0	0	0	0	0	0	0	0	0	0	0	0	0	0	0	0	0	0	0	0	0	0	0	0	0	0	0	0	0	0	0	0	0	0	0	0	0	0	0	0	0	0	0	0	0	0	0	0
45	127.051	0	0	0	0	0	0	0	0	0	0	0	0	0	0	0	0	0	0	0	0	0	0	0	0	0	0	0	0	0	0	0	0	0	0	0	0	0	0	0	0	0	0	0	0	0	0	0	0
46	128.036	0	0	0	0	0	0	0	0	0	0	0	0	0	0	0	0	0	0	0	0	0	0	0	0	0	0	0	0	0	0	0	0	0	0	0	0	0	0	0	0	0	0	0	0	0	0	0	0
47	128.071	0	0	0	0	0	0	0	0	0	0	0	0	0	0	0	0	0	0	0	0	0	0	0	0	0	0	0	0	0	0	0	0	0	0	0	0	0	0	0	0	0	0	0	0	0	0	0	0
48	129.019	0	0	0	0	0	0	0	0	0	0	0	0	0	0	0	0	0	0	0	0	0	0	0	0	0	0	0	0	0	0	0	0	0	0	0	0	0	0	0	0	0	0	0	0	0	0	0	0
49	129.055	0	0	0	0	0	0	0	0	0	0	0	0	0	0	0	0	0	0	0	0	0	0	0	0	0	0	0	0	0	0	0	0	0	0	0	0	0	0	0	0	0	0	0	0	0	0	0	0
50	129.103	0	0	0	0	0	0	0	0	0	0	0	0	0	0	0	0	0	0	0	0	0	0	0	0	0	0	0	0	0	0	0	0	0	0	0	0	0	0	0	0	0	0	0	0	0	0	0	0
51	130.051	0	0	0	0	0	0	0	0	0	0	0	0	0	0	0	0	0	0	0	0	0	0	0	0	0	0	0	0	0	0	0	0	0	0	0	0	0	0	0	0	0	0	0	0	0	0	0	0
52	130.087	0	0	0	0	0	0	0	0	0	0	0	0	0	0	0	0	0	0	0	0	0	0	0	0	0	0	0	0	0	0	0	0	0	0	0	0	0	0	0	0	0	0	0	0	0	0	0	0
53	131.046	0	0	0	0	0	0	0	0	0	0	0	0	0	0	0	0	0	0	0	0	0	0	0	0	0	0	0	0	0	0	0	0	0	0	0	0	0	0	0	0	0	0	0	0	0	0	0	0
54	132.042	0	0	0	0	0	0	0	0	0	0	0	0	0	0	0	0	0	0	0	0	0	0	0	0	0	0	0	0	0	0	0	0	0	0	0	0	0	0	0	0	0	0	0	0	0	0	0	0
55	133.015	0	0	0	0	0	0	0	0	0	0	0	0	0	0	0	0	0	0	0	0	0	0	0	0	0	0	0	0	0	0	0	0	0	0	0	0	0	0	0	0	0	0	0	0	0	0	0	0
56	135.045	0	0	0	0	0	0	0	0	0	0	0	0	0	0	0	0	0	0	0	0	0	0	0	0	0	0	0	0	0	0	0	0	0	0	0	0	0	0	0	0	0	0	0	0	0	0	0	0
57	136.041	0	0	0	0	0	0	0	0	0	0	0	0	0	0	0	0	0	0	0	0	0	0	0	0	0	0	0	0	0	0	0	0	0	0	0	0	0	0	0	0	0	0	0	0	0	0	0	0
58	136.076	0	0	0	0	0	0	0	0	0	0	0	0	0	0	0	0	0	0	0	0	0	0	0	0	0	0	0	0	0	0	0	0	0	0	0	0	0	0	0	0	0	0	0	0	0	0	0	0
59	138.019	0	0	0	0	0	0	0	0	0	0	0	0	0	0	0	0	0	0	0	0	0	0	0	0	0	0	0	0	0	0	0	0	0	0	0	0	0	0	0	0	0	0	0	0	0	0	0	0
60	140.012	0	0	0	0	0	0	0	0	0	0	0	0	0	0	0	0	0	0	0	0	0	0	0	0	0	0	0	0	0	0	0	0	0	0	0	0	0	0	0	0	0	0	0	0	0	0	0	0
61	140.083	0	0	0	0	0	0	0	0	0	0	0	0	0	0	0	0	0	0	0	0	0	0	0	0	0	0	0	0	0	0	0	0	0	0	0	0	0	0	0	0	0	0	0	0	0	0	0	0
62	141.019	0	0	0	0	0	0	0	0	0	0	0	0	0	0	0	0	0	0	0	0	0	0	0	0	0	0	0	0	0	0	0	0	0	0	0	0	0	0	0	0	0	0	0	0	0	0	0	0
63	141.068	0	0	0	0	0	0	0	0	0	0	0	0	0	0	0	0	0	0	0	0	0	0	0	0	0	0	0	0	0	0	0	0	0	0	0	0	0	0	0	0	0	0	0	0	0	0	0	0
64	144.067	0	0	0	0	0	0	0	0	0	0	0	0	0	0	0	0	0	0	0	0	0	0	0	0	0	0	0	0	0	0	0	0	0	0	0	0	0	0	0	0	0	0	0	0	0	0	0	0
65	145.014	0	0	0	0	0	0	0	0	0	0	0	0	0	0	0	0	0	0	0	0	0	0	0	0	0	0	0	0	0	0	0	0	0	0	0	0	0	0	0	0	0	0	0	0	0	0	0	0
66	145.05	0	0	0	0	0	0	0	0	0	0	0	0	0	0	0	0	0	0	0	0	0	0	0	0	0	0	0	0	0	0	0	0	0	0	0	0	0	0	0	0	0	0	0	0	0	0	0	0
67	145.062	0	0	0	0	0	0	0	0	0	0	0	0	0	0	0	0	0	0	0	0	0	0	0	0	0	0	0	0	0	0	0	0	0	0	0	0	0	0	0	0	0	0	0	0	0	0	0	0
68	146.046	0	0	0	0	0	0	0	0	0	0	0	0	0	0	0	0	0	0	0	0	0	0	0	0	0	0	0	0	0	0	0	0	0	0	0	0	0	0	0	0	0	0	0	0	0	0	0	0
69	147.03	0	0	0	0	0	0	0	0	0	0	0	0	0	0	0	0	0	0	0	0	0	0	0	0	0	0	0	0	0	0	0	0	0	0	0	0	0	0	0	0	0	0	0	0	0	0	0	0
70	147.045	0	0	0	0	0	0	0	0	0	0	0	0	0	0	0	0	0	0	0	0	0	0	0	0	0	0	0	0	0	0	0	0	0	0	0	0	0	0	0	0	0	0	0	0	0	0	0	0
71	148.042	0	0	0	0	0	0	0	0	0	0	0	0	0	0	0	0	0	0	0	0	0	0	0	0	0	0	0	0	0	0	0	0	0	0	0	0	0	0	0	0	0	0	0	0	0	0	0	0
72	149.009	0	0	0	0	0	0	0	0	0	0	0	0	0	0	0	0	0	0	0	0	0	0	0	0	0	0	0	0	0	0	0	0	0	0	0	0	0	0	0	0	0	0	0	0	0	0	0	0
73	149.046	0	0	0	0	0	0	0	0	0	0	0	0	0	0	0	0	0	0	0	0	0	0	0	0	0	0	0	0	0	0	0	0	0	0	0	0	0	0	0	0	0	0	0	0	0	0	0	0
74	151.026	0	0	0	0	0	0	0	0	0	0	0	0	0	0	0	0	0	0	0	0	0	0	0	0	0	0	0	0	0	0	0	0	0	0	0	0	0	0	0	0	0	0	0	0	0	0	0	0
75	151.04	0	0	0	0	0	0	0	0	0	0	0	0	0	0	0	0	0	0	0	0	0	0	0	0	0	0	0	0	0	0	0	0	0	0	0	0	0	0	0	0	0	0	0	0	0	0	0	0
76	151.061	0	0	0	0	0	0	0	0	0	0	0	0	0	0	0	0	0	0	0	0	0	0	0	0	0	0	0	0	0	0	0	0	0	0	0	0	0	0	0	0	0	0	0	0	0	0	0	0
77	151.112	0	0	0	0	0	0	0	0	0	0	0	0	0	0	0	0	0	0	0	0	0	0	0	0	0	0	0	0	0	0	0	0	0	0	0	0	0	0	0	0	0	0	0	0	0	0	0	0
78	152.034	0	0	0	0	0	0	0	0	0	0	0	0	0	0	0	0	0	0	0	0	0	0	0	0	0	0	0	0	0	0	0	0	0	0	0	0	0	0	0	0	0	0	0	0	0	0	0	0
79	152.071	0	0	0	0	0	0	0	0	0	0	0	0	0	0	0	0	0	0	0	0	0	0	0	0	0	0	0	0	0	0	0	0	0	0	0	0	0	0	0	0	0	0	0	0	0	0	0	0
80	152.995	0	0	0	0	0	0	0	0	0	0	0	0	0	0	0	0	0	0	0	0	0	0	0	0	0	0	0	0	0	0	0	0	0	0	0	0	0	0	0	0	0	0	0	0	0	0	0	0
81	153.019	0	0	0	0	0	0	0	0	0	0	0	0	0	0	0	0	0	0	0	0	0	0	0	0	0	0	0	0	0	0	0	0	0	0	0	0	0	0	0	0	0	0	0	0	0	0	0	0
82	154.062	0	0	0	0	0	0	0	0	0	0	0	0	0	0	0	0	0	0	0	0	0	0	0	0	0	0	0	0	0	0	0	0	0	0	0	0	0	0	0	0	0	0	0	0	0	0	0	0
83	154.975	0	0	0	0	0	0	0	0	0	0	0	0	0	0	0	0	0	0	0	0	0	0	0	0	0	0	0	0	0	0	0	0	0	0	0	0	0	0	0	0	0	0	0	0	0	0	0	0
84	155.009	0	0	0	0	0	0	0	0	0	0	0	0	0	0	0	0	0	0	0	0	0	0	0	0	0	0	0	0	0	0	0	0	0	0	0	0	0	0	0	0	0	0	0	0	0	0	0	0
85	155.035	0	0	0	0	0	0	0	0	0	0	0	0	0	0	0	0	0	0	0	0	0	0	0	0	0	0	0	0	0	0	0	0	0	0	0	0	0	0	0	0	0	0	0	0	0	0	0	0
86	157.014	0	0	0	0	0	0	0	0	0	0	0	0	0	0	0	0	0	0	0	0	0	0	0	0	0	0	0	0	0	0	0	0	0	0	0	0	0	0	0	0	0	0	0	0	0	0	0	0
87	157.036	0	0	0	0	0	0	0	0	0	0	0	0	0	0	0	0	0	0	0	0	0	0	0	0	0	0	0	0	0	0	0	0	0	0	0	0	0	0	0	0	0	0	0	0	0	0	0	0
88	157.05	0	0	0	0	0	0	0	0	0	0	0	0	0	0	0	0	0	0	0	0	0	0	0	0	0	0	0	0	0	0	0	0	0	0	0	0	0	0	0	0	0	0	0	0	0	0	0	0
89	158.061	0	0	0	0	0	0	0	0	0	0	0	0	0	0	0	0	0	0	0	0	0	0	0	0	0	0	0	0	0	0	0	0	0	0	0	0	0	0	0	0	0	0	0	0	0	0	0	0
90	159.03	0	0	0	0	0	0	0	0	0	0	0	0	0	0	0	0	0	0	0	0	0	0	0	0	0	0	0	0	0	0	0	0	0	0	0	0	0	0	0	0	0	0	0	0	0	0	0	0
91	159.044	0	0	0	0	0	0	0	0	0	0	0	0	0	0	0	0	0	0	0	0	0	0	0	0	0	0	0	0	0	0	0	0	0	0	0	0	0	0	0	0	0	0	0	0	0	0	0	0
92	160.061	0	0	0	0	0	0	0	0	0	0	0	0	0	0	0	0	0	0	0	0	0	0	0	0	0	0	0	0	0	0	0	0	0	0	0	0	0	0	0	0	0	0	0	0	0	0	0	0
93	161.045	0	0	0	0	0	0	0	0	0	0	0	0	0	0	0	0	0	0	0	0	0	0	0	0	0	0	0	0	0	0	0	0	0	0	0	0	0	0	0	0	0	0	0	0	0	0	0	0
94	163.039	0	0	0	0	0	0	0	0	0	0	0	0	0	0	0	0	0	0	0	0	0	0	0	0	0	0	0	0	0	0	0	0	0	0	0	0	0	0	0	0	0	0	0	0	0	0	0	0
95	163.061	0	0	0	0	0	0	0	0	0	0	0	0	0	0	0	0	0	0	0	0	0	0	0	0	0	0	0	0	0	0	0	0	0	0	0	0	0	0	0	0	0	0	0	0	0	0	0	0
96	164.035	0	0	0	0	0	0	0	0	0	0	0	0	0	0	0	0	0	0	0	0	0	0	0	0	0	0	0	0	0	0	0	0	0	0	0	0	0	0	0	0	0	0	0	0	0	0	0	0
97	164.071	0	0	0	0	0	0	0	0	0	0	0	0	0	0	0	0	0	0	0	0	0	0	0	0	0	0	0	0	0	0	0	0	0	0	0	0	0	0	0	0	0	0	0	0	0	0	0	0
98	165.018	0	0	0	0	0	0	0	0	0	0	0	0	0	0	0	0	0	0	0	0	0	0	0	0	0	0	0	0	0	0	0	0	0	0	0	0	0	0	0	0	0	0	0	0	0	0	0	0
99	166.05	0	0	0	0	0	0	0	0	0	0	0	0	0	0	0	0	0	0	0	0	0	0	0	0	0	0	0	0	0	0	0	0	0	0	0	0	0	0	0	0	0	0	0	0	0	0	0	0
100	166.06	0	0	0	0	0	0	0	0	0	0	0	0	0	0	0	0	0	0	0	0	0	0	0	0	0	0	0	0	0	0	0	0	0	0	0	0	0	0	0	0	0	0	0	0	0	0	0	0
101	166.975	0	0	0	0	0	0	0	0	0	0	0	0	0	0	0	0	0	0	0	0	0	0	0	0	0	0	0	0	0	0	0	0	0	0	0	0	0	0	0	0	0	0	0	0	0	0	0	0
102	167.021	0	0	0	0	0	0	0	0	0	0	0	0	0	0	0	0	0	0	0	0	0	0	0	0	0	0	0	0	0	0	0	0	0	0	0	0	0	0	0	0	0	0	0	0	0	0	0	0
103	167.034	0	0	0	0	0	0	0	0	0	0	0	0	0	0	0	0	0	0	0	0	0	0	0	0	0	0	0	0	0	0	0	0	0	0	0	0	0	0	0	0	0	0	0	0	0	0	0	0
104	167.082	0	0	0	0	0	0	0	0	0	0	0	0	0	0	0	0	0	0	0	0	0	0	0	0	0	0	0	0	0	0	0	0	0	0	0	0	0	0	0	0	0	0	0	0	0	0	0	0
105	167.997	0	0	0	0	0	0	0	0	0	0	0	0	0	0	0	0	0	0	0	0	0	0	0	0	0	0	0	0	0	0	0	0	0	0	0	0	0	0	0	0	0	0	0	0	0	0	0	0
106	170.046	0	0	0	0	0	0	0	0	0	0	0	0	0	0	0	0	0	0	0	0	0	0	0	0	0	0	0	0	0	0	0	0	0	0	0	0	0	0	0	0	0	0	0	0	0	0	0	0
107	171.006	0	0	0	0	0	0	0	0	0	0	0	0	0	0	0	0	0	0	0	0	0	0	0	0	0	0	0	0	0	0	0	0	0	0	0	0	0	0	0	0	0	0	0	0	0	0	0	0
108	171.03	0	0	0	0	0	0	0	0	0	0	0	0	0	0	0	0	0	0	0	0	0	0	0	0	0	0	0	0	0	0	0	0	0	0	0	0	0	0	0	0	0	0	0	0	0	0	0	0
109	172.061	0	0	0	0	0	0	0	0	0	0	0	0	0	0	0	0	0	0	0	0	0	0	0	0	0	0	0	0	0	0	0	0	0	0	0	0	0	0	0	0	0	0	0	0	0	0	0	0
110	173.009	0	0	0	0	0	0	0	0	0	0	0	0	0	0	0	0	0	0	0	0	0	0	0	0	0	0	0	0	0	0	0	0	0	0	0	0	0	0	0	0	0	0	0	0	0	0	0	0
111	173.045	0	0	0	0	0	0	0	0	0	0	0	0	0	0	0	0	0	0	0	0	0	0	0	0	0	0	0	0	0	0	0	0	0	0	0	0	0	0	0	0	0	0	0	0	0	0	0	0
112	173.057	0	0	0	0	0	0	0	0	0	0	0	0	0	0	0	0	0	0	0	0	0	0	0	0	0	0	0	0	0	0	0	0	0	0	0	0	0	0	0	0	0	0	0	0	0	0	0	0
113	173.093	0	0	0	0	0	0	0	0	0	0	0	0	0	0	0	0	0	0	0	0	0	0	0	0	0	0	0	0	0	0	0	0	0	0	0	0	0	0	0	0	0	0	0	0	0	0	0	0
114	174.041	0	0	0	0	0	0	0	0	0	0	0	0	0	0	0	0	0	0	0	0	0	0	0	0	0	0	0	0	0	0	0	0	0	0	0	0	0	0	0	0	0	0	0	0	0	0	0	0
115	174.056	0	0	0	0	0	0	0	0	0	0	0	0	0	0	0	0	0	0	0	0	0	0	0	0	0	0	0	0	0	0	0	0	0	0	0	0	0	0	0	0	0	0	0	0	0	0	0	0
116	174.088	0	0	0	0	0	0	0	0	0	0	0	0	0	0	0	0	0	0	0	0	0	0	0	0	0	0	0	0	0	0	0	0	0	0	0	0	0	0	0	0	0	0	0	0	0	0	0	0
117	175.024	0	0	0	0	0	0	0	0	0	0	0	0	0	0	0	0	0	0	0	0	0	0	0	0	0	0	0	0	0	0	0	0	0	0	0	0	0	0	0	0	0	0	0	0	0	0	0	0
118	175.047	0	0	0	0	0	0	0	0	0	0	0	0	0	0	0	0	0	0	0	0	0	0	0	0	0	0	0	0	0	0	0	0	0	0	0	0	0	0	0	0	0	0	0	0	0	0	0	0
119	175.061	0	0	0	0	0	0	0	0	0	0	0	0	0	0	0	0	0	0	0	0	0	0	0	0	0	0	0	0	0	0	0	0	0	0	0	0	0	0	0	0	0	0	0	0	0	0	0	0
120	177.04	0	0	0	0	0	0	0	0	0	0	0	0	0	0	0	0	0	0	0	0	0	0	0	0	0	0	0	0	0	0	0	0	0	0	0	0	0	0	0	0	0	0	0	0	0	0	0	0
121	178.051	0	0	0	0	0	0	0	0	0	0	0	0	0	0	0	0	0	0	0	0	0	0	0	0	0	0	0	0	0	0	0	0	0	0	0	0	0	0	0	0	0	0	0	0	0	0	0	0
122	179.038	0	0	0	0	0	0	0	0	0	0	0	0	0	0	0	0	0	0	0	0	0	0	0	0	0	0	0	0	0	0	0	0	0	0	0	0	0	0	0	0	0	0	0	0	0	0	0	0
123	179.056	0	0	0	0	0	0	0	0	0	0	0	0	0	0	0	0	0	0	0	0	0	0	0	0	0	0	0	0	0	0	0	0	0	0	0	0	0	0	0	0	0	0	0	0	0	0	0	0
124	181.051	0	0	0	0	0	0	0	0	0	0	0	0	0	0	0	0	0	0	0	0	0	0	0	0	0	0	0	0	0	0	0	0	0	0	0	0	0	0	0	0	0	0	0	0	0	0	0	0
125	182.97	0	0	0	0	0	0	0	0	0	0	0	0	0	0	0	0	0	0	0	0	0	0	0	0	0	0	0	0	0	0	0	0	0	0	0	0	0	0	0	0	0	0	0	0	0	0	0	0
126	183.066	0	0	0	0	0	0	0	0	0	0	0	0	0	0	0	0	0	0	0	0	0	0	0	0	0	0	0	0	0	0	0	0	0	0	0	0	0	0	0	0	0	0	0	0	0	0	0	0
127	184.001	0	0	0	0	0	0	0	0	0	0	0	0	0	0	0	0	0	0	0	0	0	0	0	0	0	0	0	0	0	0	0	0	0	0	0	0	0	0	0	0	0	0	0	0	0	0	0	0
128	184.985	0	0	0	0	0	0	0	0	0	0	0	0	0	0	0	0	0	0	0	0	0	0	0	0	0	0	0	0	0	0	0	0	0	0	0	0	0	0	0	0	0	0	0	0	0	0	0	0
129	186.113	0	0	0	0	0	0	0	0	0	0	0	0	0	0	0	0	0	0	0	0	0	0	0	0	0	0	0	0	0	0	0	0	0	0	0	0	0	0	0	0	0	0	0	0	0	0	0	0
130	188.056	0	0	0	0	0	0	0	0	0	0	0	0	0	0	0	0	0	0	0	0	0	0	0	0	0	0	0	0	0	0	0	0	0	0	0	0	0	0	0	0	0	0	0	0	0	0	0	0
131	189.041	0	0	0	0	0	0	0	0	0	0	0	0	0	0	0	0	0	0	0	0	0	0	0	0	0	0	0	0	0	0	0	0	0	0	0	0	0	0	0	0	0	0	0	0	0	0	0	0
132	189.077	0	0	0	0	0	0	0	0	0	0	0	0	0	0	0	0	0	0	0	0	0	0	0	0	0	0	0	0	0	0	0	0	0	0	0	0	0	0	0	0	0	0	0	0	0	0	0	0
133	190.05	0	0	0	0	0	0	0	0	0	0	0	0	0	0	0	0	0	0	0	0	0	0	0	0	0	0	0	0	0	0	0	0	0	0	0	0	0	0	0	0	0	0	0	0	0	0	0	0
134	191.02	0	0	0	0	0	0	0	0	0	0	0	0	0	0	0	0	0	0	0	0	0	0	0	0	0	0	0	0	0	0	0	0	0	0	0	0	0	0	0	0	0	0	0	0	0	0	0	0
135	192.066	0	0	0	0	0	0	0	0	0	0	0	0	0	0	0	0	0	0	0	0	0	0	0	0	0	0	0	0	0	0	0	0	0	0	0	0	0	0	0	0	0	0	0	0	0	0	0	0
136	193.035	0	0	0	0	0	0	0	0	0	0	0	0	0	0	0	0	0	0	0	0	0	0	0	0	0	0	0	0	0	0	0	0	0	0	0	0	0	0	0	0	0	0	0	0	0	0	0	0
137	195.051	0	0	0	0	0	0	0	0	0	0	0	0	0	0	0	0	0	0	0	0	0	0	0	0	0	0	0	0	0	0	0	0	0	0	0	0	0	0	0	0	0	0	0	0	0	0	0	0
138	203.082	0	0	0	0	0	0	0	0	0	0	0	0	0	0	0	0	0	0	0	0	0	0	0	0	0	0	0	0	0	0	0	0	0	0	0	0	0	0	0	0	0	0	0	0	0	0	0	0
139	204.052	0	0	0	0	0	0	0	0	0	0	0	0	0	0	0	0	0	0	0	0	0	0	0	0	0	0	0	0	0	0	0	0	0	0	0	0	0	0	0	0	0	0	0	0	0	0	0	0
140	209.03	0	0	0	0	0	0	0	0	0	0	0	0	0	0	0	0	0	0	0	0	0	0	0	0	0	0	0	0	0	0	0	0	0	0	0	0	0	0	0	0	0	0	0	0	0	0	0	0
141	211.997	0	0	0	0	0	0	0	0	0	0	0	0	0	0	0	0	0	0	0	0	0	0	0	0	0	0	0	0	0	0	0	0	0	0	0	0	0	0	0	0	0	0	0	0	0	0	0	0
142	212.03	0	0	0	0	0	0	0	0	0	0	0	0	0	0	0	0	0	0	0	0	0	0	0	0	0	0	0	0	0	0	0	0	0	0	0	0	0	0	0	0	0	0	0	0	0	0	0	0
143	212.979	0	0	0	0	0	0	0	0	0	0	0	0	0	0	0	0	0	0	0	0	0	0	0	0	0	0	0	0	0	0	0	0	0	0	0	0	0	0	0	0	0	0	0	0	0	0	0	0
144	213.016	0	0	0	0	0	0	0	0	0	0	0	0	0	0	0	0	0	0	0	0	0	0	0	0	0	0	0	0	0	0	0	0	0	0	0	0	0	0	0	0	0	0	0	0	0	0	0	0
145	213.126	0	0	0	0	0	0	0	0	0	0	0	0	0	0	0	0	0	0	0	0	0	0	0	0	0	0	0	0	0	0	0	0	0	0	0	0	0	0	0	0	0	0	0	0	0	0	0	0
146	214.012	0	0	0	0	0	0	0	0	0	0	0	0	0	0	0	0	0	0	0	0	0	0	0	0	0	0	0	0	0	0	0	0	0	0	0	0	0	0	0	0	0	0	0	0	0	0	0	0
147	214.048	0	0	0	0	0	0	0	0	0	0	0	0	0	0	0	0	0	0	0	0	0	0	0	0	0	0	0	0	0	0	0	0	0	0	0	0	0	0	0	0	0	0	0	0	0	0	0	0
148	215.02	0	0	0	0	0	0	0	0	0	0	0	0	0	0	0	0	0	0	0	0	0	0	0	0	0	0	0	0	0	0	0	0	0	0	0	0	0	0	0	0	0	0	0	0	0	0	0	0
149	215.033	0	0	0	0	0	0	0	0	0	0	0	0	0	0	0	0	0	0	0	0	0	0	0	0	0	0	0	0	0	0	0	0	0	0	0	0	0	0	0	0	0	0	0	0	0	0	0	0
150	215.071	0	0	0	0	0	0	0	0	0	0	0	0	0	0	0	0	0	0	0	0	0	0	0	0	0	0	0	0	0	0	0	0	0	0	0	0	0	0	0	0	0	0	0	0	0	0	0	0
151	218.033	0	0	0	0	0	0	0	0	0	0	0	0	0	0	0	0	0	0	0	0	0	0	0	0	0	0	0	0	0	0	0	0	0	0	0	0	0	0	0	0	0	0	0	0	0	0	0	0
152	218.067	0	0	0	0	0	0	0	0	0	0	0	0	0	0	0	0	0	0	0	0	0	0	0	0	0	0	0	0	0	0	0	0	0	0	0	0	0	0	0	0	0	0	0	0	0	0	0	0
153	218.103	0	0	0	0	0	0	0	0	0	0	0	0	0	0	0	0	0	0	0	0	0	0	0	0	0	0	0	0	0	0	0	0	0	0	0	0	0	0	0	0	0	0	0	0	0	0	0	0
154	220.083	0	0	0	0	0	0	0	0	0	0	0	0	0	0	0	0	0	0	0	0	0	0	0	0	0	0	0	0	0	0	0	0	0	0	0	0	0	0	0	0	0	0	0	0	0	0	0	0
155	225.041	0	0	0	0	0	0	0	0	0	0	0	0	0	0	0	0	0	0	0	0	0	0	0	0	0	0	0	0	0	0	0	0	0	0	0	0	0	0	0	0	0	0	0	0	0	0	0	0
156	225.087	0	0	0	0	0	0	0	0	0	0	0	0	0	0	0	0	0	0	0	0	0	0	0	0	0	0	0	0	0	0	0	0	0	0	0	0	0	0	0	0	0	0	0	0	0	0	0	0
157	226.012	0	0	0	0	0	0	0	0	0	0	0	0	0	0	0	0	0	0	0	0	0	0	0	0	0	0	0	0	0	0	0	0	0	0	0	0	0	0	0	0	0	0	0	0	0	0	0	0
158	227.071	0	0	0	0	0	0	0	0	0	0	0	0	0	0	0	0	0	0	0	0	0	0	0	0	0	0	0	0	0	0	0	0	0	0	0	0	0	0	0	0	0	0	0	0	0	0	0	0
159	228.028	0	0	0	0	0	0	0	0	0	0	0	0	0	0	0	0	0	0	0	0	0	0	0	0	0	0	0	0	0	0	0	0	0	0	0	0	0	0	0	0	0	0	0	0	0	0	0	0
160	229.012	0	0	0	0	0	0	0	0	0	0	0	0	0	0	0	0	0	0	0	0	0	0	0	0	0	0	0	0	0	0	0	0	0	0	0	0	0	0	0	0	0	0	0	0	0	0	0	0
161	235.073	0	0	0	0	0	0	0	0	0	0	0	0	0	0	0	0	0	0	0	0	0	0	0	0	0	0	0	0	0	0	0	0	0	0	0	0	0	0	0	0	0	0	0	0	0	0	0	0
162	237.061	0	0	0	0	0	0	0	0	0	0	0	0	0	0	0	0	0	0	0	0	0	0	0	0	0	0	0	0	0	0	0	0	0	0	0	0	0	0	0	0	0	0	0	0	0	0	0	0
163	238.094	0	0	0	0	0	0	0	0	0	0	0	0	0	0	0	0	0	0	0	0	0	0	0	0	0	0	0	0	0	0	0	0	0	0	0	0	0	0	0	0	0	0	0	0	0	0	0	0
164	243.027	0	0	0	0	0	0	0	0	0	0	0	0	0	0	0	0	0	0	0	0	0	0	0	0	0	0	0	0	0	0	0	0	0	0	0	0	0	0	0	0	0	0	0	0	0	0	0	0
165	243.062	0	0	0	0	0	0	0	0	0	0	0	0	0	0	0	0	0	0	0	0	0	0	0	0	0	0	0	0	0	0	0	0	0	0	0	0	0	0	0	0	0	0	0	0	0	0	0	0
166	253.051	0	0	0	0	0	0	0	0	0	0	0	0	0	0	0	0	0	0	0	0	0	0	0	0	0	0	0	0	0	0	0	0	0	0	0	0	0	0	0	0	0	0	0	0	0	0	0	0
167	255.233	0	0	0	0	0	0	0	0	0	0	0	0	0	0	0	0	0	0	0	0	0	0	0	0	0	0	0	0	0	0	0	0	0	0	0	0	0	0	0	0	0	0	0	0	0	0	0	0
168	258.039	0	0	0	0	0	0	0	0	0	0	0	0	0	0	0	0	0	0	0	0	0	0	0	0	0	0	0	0	0	0	0	0	0	0	0	0	0	0	0	0	0	0	0	0	0	0	0	0
169	259.023	0	0	0	0	0	0	0	0	0	0	0	0	0	0	0	0	0	0	0	0	0	0	0	0	0	0	0	0	0	0	0	0	0	0	0	0	0	0	0	0	0	0	0	0	0	0	0	0
170	260.114	0	0	0	0	0	0	0	0	0	0	0	0	0	0	0	0	0	0	0	0	0	0	0	0	0	0	0	0	0	0	0	0	0	0	0	0	0	0	0	0	0	0	0	0	0	0	0	0
171	264.951	0	0	0	0	0	0	0	0	0	0	0	0	0	0	0	0	0	0	0	0	0	0	0	0	0	0	0	0	0	0	0	0	0	0	0	0	0	0	0	0	0	0	0	0	0	0	0	0
172	267.073	0	0	0	0	0	0	0	0	0	0	0	0	0	0	0	0	0	0	0	0	0	0	0	0	0	0	0	0	0	0	0	0	0	0	0	0	0	0	0	0	0	0	0	0	0	0	0	0
173	277.123	0	0	0	0	0	0	0	0	0	0	0	0	0	0	0	0	0	0	0	0	0	0	0	0	0	0	0	0	0	0	0	0	0	0	0	0	0	0	0	0	0	0	0	0	0	0	0	0
174	282.084	0	0	0	0	0	0	0	0	0	0	0	0	0	0	0	0	0	0	0	0	0	0	0	0	0	0	0	0	0	0	0	0	0	0	0	0	0	0	0	0	0	0	0	0	0	0	0	0
175	283.205	0	0	0	0	0	0	0	0	0	0	0	0	0	0	0	0	0	0	0	0	0	0	0	0	0	0	0	0	0	0	0	0	0	0	0	0	0	0	0	0	0	0	0	0	0	0	0	0
176	289.116	0	0	0	0	0	0	0	0	0	0	0	0	0	0	0	0	0	0	0	0	0	0	0	0	0	0	0	0	0	0	0	0	0	0	0	0	0	0	0	0	0	0	0	0	0	0	0	0
177	292.104	0	0	0	0	0	0	0	0	0	0	0	0	0	0	0	0	0	0	0	0	0	0	0	0	0	0	0	0	0	0	0	0	0	0	0	0	0	0	0	0	0	0	0	0	0	0	0	0
178	293.212	0	0	0	0	0	0	0	0	0	0	0	0	0	0	0	0	0	0	0	0	0	0	0	0	0	0	0	0	0	0	0	0	0	0	0	0	0	0	0	0	0	0	0	0	0	0	0	0
179	295.228	0	0	0	0	0	0	0	0	0	0	0	0	0	0	0	0	0	0	0	0	0	0	0	0	0	0	0	0	0	0	0	0	0	0	0	0	0	0	0	0	0	0	0	0	0	0	0	0
180	298	0	0	0	0	0	0	0	0	0	0	0	0	0	0	0	0	0	0	0	0	0	0	0	0	0	0	0	0	0	0	0	0	0	0	0	0	0	0	0	0	0	0	0	0	0	0	0	0
181	298.069	0	0	0	0	0	0	0	0	0	0	0	0	0	0	0	0	0	0	0	0	0	0	0	0	0	0	0	0	0	0	0	0	0	0	0	0	0	0	0	0	0	0	0	0	0	0	0	0
182	300.05	0	0	0	0	0	0	0	0	0	0	0	0	0	0	0	0	0	0	0	0	0	0	0	0	0	0	0	0	0	0	0	0	0	0	0	0	0	0	0	0	0	0	0	0	0	0	0	0
183	306.049	0	0	0	0	0	0	0	0	0	0	0	0	0	0	0	0	0	0	0	0	0	0	0	0	0	0	0	0	0	0	0	0	0	0	0	0	0	0	0	0	0	0	0	0	0	0	0	0
184	312.059	0	0	0	0	0	0	0	0	0	0	0	0	0	0	0	0	0	0	0	0	0	0	0	0	0	0	0	0	0	0	0	0	0	0	0	0	0	0	0	0	0	0	0	0	0	0	0	0
185	317.029	0	0	0	0	0	0	0	0	0	0	0	0	0	0	0	0	0	0	0	0	0	0	0	0	0	0	0	0	0	0	0	0	0	0	0	0	0	0	0	0	0	0	0	0	0	0	0	0
186	322.045	0	0	0	0	0	0	0	0	0	0	0	0	0	0	0	0	0	0	0	0	0	0	0	0	0	0	0	0	0	0	0	0	0	0	0	0	0	0	0	0	0	0	0	0	0	0	0	0
187	323.029	0	0	0	0	0	0	0	0	0	0	0	0	0	0	0	0	0	0	0	0	0	0	0	0	0	0	0	0	0	0	0	0	0	0	0	0	0	0	0	0	0	0	0	0	0	0	0	0
188	325.094	0	0	0	0	0	0	0	0	0	0	0	0	0	0	0	0	0	0	0	0	0	0	0	0	0	0	0	0	0	0	0	0	0	0	0	0	0	0	0	0	0	0	0	0	0	0	0	0
189	331.046	0	0	0	0	0	0	0	0	0	0	0	0	0	0	0	0	0	0	0	0	0	0	0	0	0	0	0	0	0	0	0	0	0	0	0	0	0	0	0	0	0	0	0	0	0	0	0	0
190	335.04	0	0	0	0	0	0	0	0	0	0	0	0	0	0	0	0	0	0	0	0	0	0	0	0	0	0	0	0	0	0	0	0	0	0	0	0	0	0	0	0	0	0	0	0	0	0	0	0
191	338.038	0	0	0	0	0	0	0	0	0	0	0	0	0	0	0	0	0	0	0	0	0	0	0	0	0	0	0	0	0	0	0	0	0	0	0	0	0	0	0	0	0	0	0	0	0	0	0	0
192	338.989	0	0	0	0	0	0	0	0	0	0	0	0	0	0	0	0	0	0	0	0	0	0	0	0	0	0	0	0	0	0	0	0	0	0	0	0	0	0	0	0	0	0	0	0	0	0	0	0
193	341.11	0	0	0	0	0	0	0	0	0	0	0	0	0	0	0	0	0	0	0	0	0	0	0	0	0	0	0	0	0	0	0	0	0	0	0	0	0	0	0	0	0	0	0	0	0	0	0	0
194	344.04	0	0	0	0	0	0	0	0	0	0	0	0	0	0	0	0	0	0	0	0	0	0	0	0	0	0	0	0	0	0	0	0	0	0	0	0	0	0	0	0	0	0	0	0	0	0	0	0
195	344.07	0	0	0	0	0	0	0	0	0	0	0	0	0	0	0	0	0	0	0	0	0	0	0	0	0	0	0	0	0	0	0	0	0	0	0	0	0	0	0	0	0	0	0	0	0	0	0	0
196	346.056	0	0	0	0	0	0	0	0	0	0	0	0	0	0	0	0	0	0	0	0	0	0	0	0	0	0	0	0	0	0	0	0	0	0	0	0	0	0	0	0	0	0	0	0	0	0	0	0
197	348.087	0	0	0	0	0	0	0	0	0	0	0	0	0	0	0	0	0	0	0	0	0	0	0	0	0	0	0	0	0	0	0	0	0	0	0	0	0	0	0	0	0	0	0	0	0	0	0	0
198	354.001	0	0	0	0	0	0	0	0	0	0	0	0	0	0	0	0	0	0	0	0	0	0	0	0	0	0	0	0	0	0	0	0	0	0	0	0	0	0	0	0	0	0	0	0	0	0	0	0
199	362.051	0	0	0	0	0	0	0	0	0	0	0	0	0	0	0	0	0	0	0	0	0	0	0	0	0	0	0	0	0	0	0	0	0	0	0	0	0	0	0	0	0	0	0	0	0	0	0	0
200	363.035	0	0	0	0	0	0	0	0	0	0	0	0	0	0	0	0	0	0	0	0	0	0	0	0	0	0	0	0	0	0	0	0	0	0	0	0	0	0	0	0	0	0	0	0	0	0	0	0
201	363.217	0	0	0	0	0	0	0	0	0	0	0	0	0	0	0	0	0	0	0	0	0	0	0	0	0	0	0	0	0	0	0	0	0	0	0	0	0	0	0	0	0	0	0	0	0	0	0	0
202	367.249	0	0	0	0	0	0	0	0	0	0	0	0	0	0	0	0	0	0	0	0	0	0	0	0	0	0	0	0	0	0	0	0	0	0	0	0	0	0	0	0	0	0	0	0	0	0	0	0
203	375.13	0	0	0	0	0	0	0	0	0	0	0	0	0	0	0	0	0	0	0	0	0	0	0	0	0	0	0	0	0	0	0	0	0	0	0	0	0	0	0	0	0	0	0	0	0	0	0	0
204	379.013	0	0	0	0	0	0	0	0	0	0	0	0	0	0	0	0	0	0	0	0	0	0	0	0	0	0	0	0	0	0	0	0	0	0	0	0	0	0	0	0	0	0	0	0	0	0	0	0
205	388.067	0	0	0	0	0	0	0	0	0	0	0	0	0	0	0	0	0	0	0	0	0	0	0	0	0	0	0	0	0	0	0	0	0	0	0	0	0	0	0	0	0	0	0	0	0	0	0	0
206	402.011	0	0	0	0	0	0	0	0	0	0	0	0	0	0	0	0	0	0	0	0	0	0	0	0	0	0	0	0	0	0	0	0	0	0	0	0	0	0	0	0	0	0	0	0	0	0	0	0
207	402.995	0	0	0	0	0	0	0	0	0	0	0	0	0	0	0	0	0	0	0	0	0	0	0	0	0	0	0	0	0	0	0	0	0	0	0	0	0	0	0	0	0	0	0	0	0	0	0	0
208	421.077	0	0	0	0	0	0	0	0	0	0	0	0	0	0	0	0	0	0	0	0	0	0	0	0	0	0	0	0	0	0	0	0	0	0	0	0	0	0	0	0	0	0	0	0	0	0	0	0
209	426.022	0	0	0	0	0	0	0	0	0	0	0	0	0	0	0	0	0	0	0	0	0	0	0	0	0	0	0	0	0	0	0	0	0	0	0	0	0	0	0	0	0	0	0	0	0	0	0	0
210	442.017	0	0	0	0	0	0	0	0	0	0	0	0	0	0	0	0	0	0	0	0	0	0	0	0	0	0	0	0	0	0	0	0	0	0	0	0	0	0	0	0	0	0	0	0	0	0	0	0
211	455.156	0	0	0	0	0	0	0	0	0	0	0	0	0	0	0	0	0	0	0	0	0	0	0	0	0	0	0	0	0	0	0	0	0	0	0	0	0	0	0	0	0	0	0	0	0	0	0	0
212	472.159	0	0	0	0	0	0	0	0	0	0	0	0	0	0	0	0	0	0	0	0	0	0	0	0	0	0	0	0	0	0	0	0	0	0	0	0	0	0	0	0	0	0	0	0	0	0	0	0
213	482.962	0	0	0	0	0	0	0	0	0	0	0	0	0	0	0	0	0	0	0	0	0	0	0	0	0	0	0	0	0	0	0	0	0	0	0	0	0	0	0	0	0	0	0	0	0	0	0	0
214	490.976	0	0	0	0	0	0	0	0	0	0	0	0	0	0	0	0	0	0	0	0	0	0	0	0	0	0	0	0	0	0	0	0	0	0	0	0	0	0	0	0	0	0	0	0	0	0	0	0
215	535.037	0	0	0	0	0	0	0	0	0	0	0	0	0	0	0	0	0	0	0	0	0	0	0	0	0	0	0	0	0	0	0	0	0	0	0	0	0	0	0	0	0	0	0	0	0	0	0	0
216	561.252	0	0	0	0	0	0	0	0	0	0	0	0	0	0	0	0	0	0	0	0	0	0	0	0	0	0	0	0	0	0	0	0	0	0	0	0	0	0	0	0	0	0	0	0	0	0	0	0
217	565.048	0	0	0	0	0	0	0	0	0	0	0	0	0	0	0	0	0	0	0	0	0	0	0	0	0	0	0	0	0	0	0	0	0	0	0	0	0	0	0	0	0	0	0	0	0	0	0	0
218	579.026	0	0	0	0	0	0	0	0	0	0	0	0	0	0	0	0	0	0	0	0	0	0	0	0	0	0	0	0	0	0	0	0	0	0	0	0	0	0	0	0	0	0	0	0	0	0	0	0
219	588.075	0	0	0	0	0	0	0	0	0	0	0	0	0	0	0	0	0	0	0	0	0	0	0	0	0	0	0	0	0	0	0	0	0	0	0	0	0	0	0	0	0	0	0	0	0	0	0	0
220	604.069	0	0	0	0	0	0	0	0	0	0	0	0	0	0	0	0	0	0	0	0	0	0	0	0	0	0	0	0	0	0	0	0	0	0	0	0	0	0	0	0	0	0	0	0	0	0	0	0
221	606.075	0	0	0	0	0	0	0	0	0	0	0	0	0	0	0	0	0	0	0	0	0	0	0	0	0	0	0	0	0	0	0	0	0	0	0	0	0	0	0	0	0	0	0	0	0	0	0	0
222	702.248	0	0	0	0	0	0	0	0	0	0	0	0	0	0	0	0	0	0	0	0	0	0	0	0	0	0	0	0	0	0	0	0	0	0	0	0	0	0	0	0	0	0	0	0	0	0	0	0
223	716.264	0	0	0	0	0	0	0	0	0	0	0	0	0	0	0	0	0	0	0	0	0	0	0	0	0	0	0	0	0	0	0	0	0	0	0	0	0	0	0	0	0	0	0	0	0	0	0	0
224	990.286	0	0	0	0	0	0	0	0	0	0	0	0	0	0	0	0	0	0	0	0	0	0	0	0	0	0	0	0	0	0	0	0	0	0	0	0	0	0	0	0	0	0	0	0	0	0	0	0
[truncated: 46 more columns]
