# Supplementary material for: Metabolomic Profiling of Bradyrhizobium diazoefficiens-Induced Root Nodules Reveals Both Host Plant-Specific and Developmental Signatures
Source: Int J Mol Sci. 2016 May 27;17(6):815. doi: 10.3390/ijms17060815 (PMC4926349; doi:10.3390/ijms17060815)
Supplement: Supplementary file 1 [file ijms-17-00815-s001.zip › ijms-127696-Supplemental Tables S1-S7-for publication.xlsx]

## Sheet: Table S1
Table S1. List of the 223 ions and corresponding annotations as detected in soybean nodules 21 dpi.
IonIdx	IonMz	IonAverageInt	IonQualTIC	Additional Information about the Top Annotation
				Top Annotation Name a	Ids a	Formula	Ion	Score
1	55.0189	8613.46	0.702985	2-Propyn-1-ol	C05986	C3H4O	-H(-)	100
2	57.0346	102147	0.14633	Acetone	C00207	C3H6O	-H(-)	100
3	59.0134	187007	0.930246	Acetate; Glycolaldehyde	C00033; C00266	C2H4O2	-H(-)	100
4	71.014	316606	0.91312	Acrylic acid; Methylglyoxal	C00511; C00546	C3H4O2	-H(-)	100
5	72.0093	15434.9	0.837352	Iminoglycine	C15809	C2H3NO2	-H(-)	100
6	72.9934	84966	0.856445	Glyoxylate	C00048	C2H2O3	-H(-)	100
7	73.0294	79452.5	0.885353	Propanoate; (S)-Lactaldehyde; (R)-Lactaldehyde; Methyl acetate	C00163; C00424; C00937; C17530	C3H6O2	-H(-)	100
8	74.0248	9673.05	0.79954	Glycine	C00037	C2H5NO2	-H(-)	100
9	75.0089	24429.1	0.852208	Glycolate	C00160	C2H4O3	-H(-)	100
10	87.0087	178263	0.943201	Pyruvate; 3-Oxopropanoate	C00022; C00222	C3H4O3	-H(-)	100
11	87.0451	11092	0.780119	Butanoic acid	C00246	C4H8O2	-H(-)	100
12	88.9881	54538	0.814767	Oxalate	C00209	C2H2O4	-H(-)	100
13	89.0244	151979	0.935549	Glycerone; (S)-Lactate; (R)-Lactate; D-Glyceraldehyde	C00184; C00186; C00256; C00577	C3H6O3	-H(-)	100
14	91.0399	18539.8	0.876085	Glycerol	C00116	C3H8O3	-H(-)	100
15	93.0344	31255.3	0.750281	Phenol	C00146	C6H6O	-H(-)	100
16	95.0139	23751.5	0.48157	Protoanemonin; Furfural	C07090; C14279	C5H4O2	-H(-)	100
17	100.04	6987.22	0.737587	1-Aminocyclopropane-1-carboxylate; 2-Aminobut-2-enoate	C01234; C17234	C4H7NO2	-H(-)	100
18	101.025	173118	0.92562	2-Oxobutanoate; Acetoacetate; Succinate semialdehyde	C00109; C00164; C00232; C06002	C4H6O3	-H(-)	100
19	102.056	22791.4	0.892983	4-Aminobutanoate; L-3-Amino-isobutanoate	C00334; C03284	C4H9NO2	-H(-)	100
20	103.003	167405	0.88243	Hydroxypyruvate; Malonate; 2-Hydroxy-3-oxopropanoate	C00168; C00383; C01146	C3H4O4	-H(-)	100
21	103.016	14647.6	0.864213	Urea-1-carboxylate	C01010	C2H4N2O3	-H(-)	100
22	103.04	17458.1	0.82156	(R)-3-Hydroxybutanoate; (S)-3-Hydroxyisobutyrate	C01089; C06001	C4H8O3	-H(-)	100
23	104.035	12404.6	0.83058	L-Serine; D-Serine	C00065; C00740	C3H7NO3	-H(-)	100
24	109.03	12512	0.790789	Catechol; Resorcinol	C00090; C01751	C6H6O2	-H(-)	100
25	109.041	7082.5	0.821146	Imidazole-4-acetaldehyde	C05130	C5H6N2O	-H(-)	100
26	111.009	209407	0.747757	2-Furoate	C01546	C5H4O3	-H(-)	100
27	111.021	28117	0.843982	Uracil	C00106	C4H4N2O2	-H(-)	100
28	113.025	277101	0.826169	cis-Acetylacrylate	C07091	C5H6O3	-H(-)	100
29	113.036	306765	0.869279	5,6-Dihydrouracil; 3-Cyano-L-alanine; N-Methylhydantoin	C00429; C02512; C02565	C4H6N2O2	-H(-)	100
30	114.056	43097.4	0.869012	L-Proline	C00148	C5H9NO2	-H(-)	100
31	115.004	1.77337e+06	0.932524	Fumarate; Maleic acid	C00122; C01384	C4H4O4	-H(-)	100
32	116.035	15723.1	0.719024	L-Aspartate 4-semialdehyde	C00441	C4H7NO3	-H(-)	100
33	116.072	204438	0.86774	L-Valine	C00183	C5H11NO2	-H(-)	100
34	117.019	302736	0.850226	Succinate; Methylmalonate	C00042; C02170	C4H6O4	-H(-)	100
35	118.051	46836.2	0.855298	L-Threonine; L-Homoserine; L-Allothreonine	C00188; C00263; C05519	C4H9NO3	-H(-)	100
36	118.98	54735.1	0.270745	Mercaptopyruvate	C00957	C3H4O3S	-H(-)	100
37	119.05	255312	0.876792	Phenylacetaldehyde; p-Tolualdehyde; 3-Methylbenzaldehyde; 2-Methylbenzaldehyde	C00601; C06758; C07209; C07214	C8H8O	-H(-)	100
38	120.045	21176.9	0.754627	Benzamide	C09815	C7H7NO	-H(-)	100
39	121.03	705971	0.907023	Benzoate; 4-Hydroxybenzaldehyde; 3-Hydroxybenzaldehyde	C00180; C00633; C03067	C7H6O2	-H(-)	100
40	121.041	91514.6	0.730415	Nicotinamide	C00153	C6H6N2O	-H(-)	100
41	125.024	1.19959e+06	0.77025	Benzene-1,2,4-triol; 5-Hydroxymethyl-2-furaldehyde	C02814; C11101	C6H6O3	-H(-)	100
42	125.036	131215	0.439657	Thymine; Imidazole-4-acetate	C00178; C02835	C5H6N2O2	-H(-)	100
43	126.092	9434.02	0.809561	N-Cyclohexylformamide	C11519	C7H13NO	-H(-)	100
44	127.051	96887.4	0.917099	5,6-Dihydrothymine; gamma-Amino-gamma-cyanobutanoate	C00906; C05715	C5H8N2O2	-H(-)	100
45	128.036	443455	0.915812	L-1-Pyrroline-3-hydroxy-5-carboxylate	C04281	C5H7NO3	-H(-)	100
46	128.071	66346.4	0.896044	N4-Acetylaminobutanal	C05936	C6H11NO2	-H(-)	100
47	129.019	494244	0.953962	2,5-Dioxopentanoate; Itaconate; 2-Methylmaleate	C00433; C00490; C02226	C5H6O4	-H(-)	100
48	129.055	136222	0.796088	4-Methyl-2-oxopentanoate; (S)-3-Methyl-2-oxopentanoic acid	C00233; C00671; C12314	C6H10O3	-H(-)	100
49	129.103	21128.9	0.798301	N-Acetylputrescine	C02714	C6H14N2O	-H(-)	100
50	130.051	78226.8	0.90719	5-Aminolevulinate; 5-Amino-2-oxopentanoic acid; Hydroxyproline	C00430; C01110; C01157; C01165; C03741	C5H9NO3	-H(-)	100
51	130.087	514265	0.9056	L-Leucine; L-Isoleucine	C00123; C00407	C6H13NO2	-H(-)	100
52	131.046	1.82006e+06	0.927626	L-Asparagine; N-Carbamoylsarcosine; 3-Ureidopropionate	C00152; C01043; C02642	C4H8N2O3	-H(-)	100
53	132.042	224255	0.959935	(S)-Ureidoglycine	C02091	C3H7N3O3	-H(-)	100
54	133.015	1.59888e+07	0.935869	(S)-Malate; (R)-Malate	C00149; C00497	C4H6O5	-H(-)	100
55	135.045	365968	0.943948	Toluate; 4-Hydroxyphenylacetaldehyde; 3-Vinylcatechol; Phenylacetic acid	C01454; C03765; C07085; C07086; C07211; C07215; C10700	C8H8O2	-H(-)	100
56	136.04	127642	0.823106	Anthranilate; 4-Aminobenzoate	C00108; C00568	C7H7NO2	-H(-)	100
57	136.076	17207.6	0.693815	Tyramine	C00483	C8H11NO	-H(-)	100
58	138.019	172031	0.208659	4-Nitrophenol; 6-Hydroxynicotinate	C00870; C01020	C6H5NO3	-H(-)	100
59	140.012	48414.5	0.375298	Ethanolamine phosphate	C00346	C2H8NO4P	-H(-)	100
60	140.083	55952.6	0.0877571	L-Histidinol	C00860	C6H11N3O	-H(-)	100
61	141.019	729668	0.785311	2-Hydroxymuconate semialdehyde; cis,cis-Muconate	C00682; C02480; C03586; C14610; C20448	C6H6O4	-H(-)	100
62	141.068	23399	0.654377	Ectoine	C06231	C6H10N2O2	-H(-)	100
63	144.067	141789	0.900231	4-Acetamidobutanoate; 6-Amino-2-oxohexanoate	C02946; C03239	C6H11NO3	-H(-)	100
64	145.014	497959	0.953965	2-Oxoglutarate	C00026	C5H6O5	-H(-)	100
65	145.05	122024	0.82577	2-Dehydropantoate; (S)-2-Aceto-2-hydroxybutanoate	C00966; C06006; C14463; C16272	C6H10O4	-H(-)	100
66	145.062	656559	0.948687	L-Glutamine; D-Glutamine; 3-Ureidoisobutyrate	C00064; C00819; C05100	C5H10N2O3	-H(-)	100
67	146.046	1.22222e+06	0.960034	L-Glutamate; D-Glutamate; Glutamate; O-Acetyl-L-serine	C00025; C00217; C00302; C00979; C05938	C5H9NO4	-H(-)	100
68	147.03	954467	0.832446	(R)-2-Methylmalate; 2-Hydroxyglutarate; D-erythro-3-Methylmalate	C02612; C02630; C06032	C5H8O5	-H(-)	100
69	147.045	389851	0.954369	trans-Cinnamate	C00423	C9H8O2	-H(-)	100
70	148.042	42282.1	0.815824	(S)-4-Hydroxymandelonitrile	C03742	C8H7NO2	-H(-)	63
71	149.009	733789	0.670092	meso-Tartaric acid; (R,R)-Tartaric acid	C00552; C00898	C4H6O6	-H(-)	100
72	149.046	5.31585e+06	0.889881	D-Ribose; D-Xylose; D-Ribulose; D-Xylulose	C00121; C00181; C00309; C00310	C5H10O5	-H(-)	100
73	151.026	51839.6	0.900723	Xanthine	C00385	C5H4N4O2	-H(-)	100
74	151.04	179651	0.855929	4-Hydroxyphenylacetate; (R)-Mandelate; (S)-Mandelate	C00642; C01983; C01984; C04043; C05593; C05852; C13636; C14088; C14103	C8H8O3	-H(-)	100
75	151.061	91786	0.894919	Ribitol	C00474	C5H12O5	-H(-)	100
76	151.112	22478.9	0.654395	Limonene-1,2-epoxide; Myrtenol; Pinocarveol; (4S)-Limonene-1,2-epoxide	C07271; C11938; C11941; C19081	C10H16O	-H(-)	100
77	152.034	69941.5	0.889921	3-Hydroxyanthranilate	C00632	C7H7NO3	-H(-)	55
78	152.071	31764.1	0.861687	Dopamine	C03758	C8H11NO2	-H(-)	100
79	152.995	44306.1	0.932329	Propanoyl phosphate	C02876	C3H7O5P	-H(-)	100
80	153.019	183622	0.925869	3,4-Dihydroxybenzoate; 2,5-Dihydroxybenzoate	C00230; C00628	C7H6O4	-H(-)	100
81	154.062	278390	0.795129	L-Histidine	C00135	C6H9N3O2	-H(-)	100
82	154.975	33012.1	0.787604	2-Phosphoglycolate	C00988	C2H5O6P	-H(-)	100
83	155.009	27310.8	0.486789	Orotate	C00295	C5H4N2O4	-H(-)	100
84	155.035	433256	0.91085	3-Methyl-cis,cis-hexadienedioate; 3-Methylmuconolactone	C04112; C04558; C04559; C06210; C06760	C7H8O4	-H(-)	100
85	157.014	78495.1	0.262433	2-Maleylacetate; 2-Hydroxymuconate; gamma-Oxalocrotonate	C02222; C02501; C03453; C03676	C6H6O5	-H(-)	100
86	157.036	244565	0.910919	(R)(-)-Allantoin; (S)-Allantoin	C02348; C02350	C4H6N4O3	-H(-)	100
87	157.05	170255	0.773062	2-Isopropylmaleate	C02631	C7H10O4	-H(-)	100
88	158.061	58535.3	0.730107	Indole-3-acetaldehyde	C00637	C10H9NO	-H(-)	100
89	159.03	695034	0.937349	2-Oxoadipate; 3-Oxoadipate; 2-Formylglutarate; 2,4-Diketo-3-deoxy-L-fuconate	C00322; C00846; C16159; C20781	C6H8O5	-H(-)	100
90	159.045	254673	0.899713	Naphthalene-1,2-diol	C03012	C10H8O2	-H(-)	100
91	160.061	105729	0.918053	L-2-Aminoadipate; O-Acetyl-L-homoserine	C00956; C01077	C6H11NO4	-H(-)	100
92	161.045	3.25169e+06	0.96143	2-Dehydro-3-deoxy-L-fuconate; L-Fucono-1,5-lactone	C03827; C18028	C6H10O5	-H(-)	100
93	163.039	296927	0.850038	Phenylpyruvate; cis-2-Hydroxycinnamate; trans-3-Hydroxycinnamate	C00166; C05838; C12621	C9H8O3	-H(-)	100
94	163.061	264654	0.882381	6-Deoxy-L-galactose	C01019	C6H12O5	-H(-)	100
95	164.035	56958.7	0.703179	Formylanthranilate	C05653	C8H7NO3	-H(-)	100
96	164.072	295027	0.950123	L-Phenylalanine; D-Phenylalanine	C00079; C02265	C9H11NO2	-H(-)	100
97	165.019	204365	0.782395	4-Hydroxyphenylglyoxylate	C03590	C8H6O4	-H(-)	100
98	166.05	73222.5	0.871608	Pyridoxal	C00250	C8H9NO3	-H(-)	100
99	166.06	25834	0.865942	2,4-Diamino-6-nitrotoluene	C16396	C7H9N3O2	-H(-)	30
100	166.975	34629	0.799132	Phosphoenolpyruvate	C00074	C3H5O6P	-H(-)	100
101	167.021	27976.5	0.869602	Urate	C00366	C5H4N4O3	-H(-)	100
102	167.034	528373	0.872397	Homogentisate; 3,4-Dihydroxyphenylacetate; (S)-4-Hydroxymandelate	C00544; C01161; C03198; C05343; C05577; C07087; C14109	C8H8O4	-H(-)	100
103	167.082	33241.4	0.809235	Pyridoxamine	C00534	C8H12N2O2	-H(-)	100
104	167.997	32948.8	0.871219	L-Cysteate	C00506	C3H7NO5S	-H(-)	100
105	170.046	35169.2	0.726249	2,3,4,5-Tetrahydrodipicolinate	C03972	C7H9NO4	-H(-)	100
106	171.006	93766.7	0.955284	sn-Glycerol 3-phosphate	C00093	C3H9O6P	-H(-)	100
107	171.03	73933.3	0.904647	3-Dehydroshikimate; 2-Oxohept-3-enedioate	C02637; C03063; C05600; C07478; C07479; C18306	C7H8O5	-H(-)	100
108	172.061	191053	0.951733	N-Acetyl-L-glutamate 5-semialdehyde	C01250	C7H11NO4	-H(-)	100
109	173.009	259071	0.908632	cis-Aconitate	C00417	C6H6O6	-H(-)	100
110	173.045	213144	0.834775	Shikimate; (2S)-2-Isopropyl-3-oxosuccinate; 2-Methyl-3-oxoadipate	C00493; C04236; C18307	C7H10O5	-H(-)	100
111	173.057	64074.3	0.906937	N-Formimino-L-glutamate	C00439	C6H10N2O4	-H(-)	100
112	173.093	193919	0.952899	N-Acetylornithine	C00437	C7H14N2O3	-H(-)	100
113	174.041	45008.8	0.825586	7-Cyano-7-carbaguanine	C15996	C7H5N5O	-H(-)	100
114	174.056	35377.6	0.848611	Indole-3-acetate; 5-Hydroxyindoleacetaldehyde	C00954; C05634	C10H9NO2	-H(-)	100
115	174.088	67624.9	0.938659	L-Citrulline	C00327	C6H13N3O3	-H(-)	100
116	175.025	209046	0.894314	D-Glucuronolactone; (4S)-4,6-Dihydroxy-2,5-dioxohexanoate; Parapyruvate	C02670; C04349; C06033	C6H8O6	-H(-)	100
117	175.047	275619	0.967793	Allantoate	C00499	C4H8N4O4	-H(-)	100
118	175.061	595667	0.913741	alpha-Isopropylmalate; (2R,3S)-3-Isopropylmalate	C02504; C04411	C7H12O5	-H(-)	100
119	177.04	549843	0.924699	D-Glucono-1,5-lactone; 2-Dehydro-3-deoxy-D-gluconate; L-Gulono-1,4-lactone	C00198; C00204; C01040; C01115; C01216; C03383	C6H10O6	-H(-)	100
120	178.051	102633	0.901868	Hippurate	C01586	C9H9NO3	-H(-)	100
121	179.038	152726	0.921292	5-Methylthio-D-ribose	C03089	C6H12O4S	-H(-)	100
122	179.056	6.82677e+06	0.96713	D-Glucose; D-Fructose; D-Galactose; myo-Inositol; D-Mannose	C00031; C00095; C00124; C00137; C00159; C00221; C00267; C00984; C01720; C01825; C02336	C6H12O6	-H(-)	100
123	181.051	411436	0.600178	3-(2,3-Dihydroxyphenyl)propanoate; 3-Methoxy-4-hydroxyphenylglycolaldehyde	C04044; C05583; C12622	C9H10O4	-H(-)	100
124	182.97	194778	0.863052	3-Phosphonooxypyruvate	C03232	C3H5O7P	-H(-)	100
125	183.066	50371.7	0.760563	cis-3-(Carboxy-ethyl)-3,5-cyclo-hexadiene-1,2-diol; Choline phosphate	C00588; C11588	C5H15NO4P; C9H12O4	-H(-); -H(-)	100
126	184.001	254023	0.84648	O-Phospho-L-serine	C01005	C3H8NO6P	-H(-)	100
127	184.985	100792	0.0533189	3-Phospho-D-glycerate; 2-Phospho-D-glycerate	C00197; C00631	C3H7O7P	-H(-)	100
128	186.113	24545.5	0.836157	8-Amino-7-oxononanoate	C01092	C9H17NO3	-H(-)	100
129	188.056	571371	0.959689	N-Acetyl-L-glutamate	C00624	C7H11NO5	-H(-)	100
130	189.041	59263.5	0.889234	3-Dehydroquinate; 4-Hydroxy-2-oxo-heptanedioate; 2,4-Dihydroxyhept-2-enedioate	C00944; C05601; C06201	C7H10O6	-H(-)	100
131	189.077	330000	0.910993	(R)-3-((R)-3-Hydroxybutanoyloxy)butanoate	C04546	C8H14O5	-H(-)	100
132	190.05	34598.2	0.881206	5-Hydroxyindoleacetate; 5-Phenyl-1,3-oxazinane-2,4-dione	C05635; C16596	C10H9NO3	-H(-)	100
133	191.02	6.90212e+06	0.682577	Citrate; Isocitrate; 5-Dehydro-4-deoxy-D-glucarate	C00158; C00311; C00679; C03921	C6H8O7	-H(-)	100
134	192.066	112621	0.947947	3-Carbamoyl-2-phenylpropionaldehyde	C16587; C16595	C10H11NO3	-H(-)	100
135	193.035	139022	0.942528	D-Galacturonate; D-Fructuronate; 5-Dehydro-D-gluconate	C00333; C00905; C01062	C6H10O7	-H(-)	100
136	195.051	4.9361e+06	0.952031	D-Gluconic acid; D-Mannonate; L-Idonate; L-Gulonate; D-Altronate	C00257; C00514; C00770; C00800; C00817	C6H12O7	-H(-)	100
137	203.082	655351	0.943001	L-Tryptophan	C00078	C11H12N2O2	-H(-)	100
138	204.052	25238.8	0.802337	Lipoamide	C00248	C8H15NOS2	-H(-)	100
139	209.03	2.77891e+06	0.892563	D-Glucarate; D-Galactarate	C00818; C00879	C6H10O8	-H(-)	100
140	211.997	10279	0.754266	4-Phospho-L-aspartate; 2-Amino-3-oxo-4-phosphonooxybutyrate	C03082; C07335	C4H8NO7P	-H(-)	100
141	212.03	20337.1	0.790705	4-Hydroxylamino-2,6-dinitrotoluene; 2-Hydroxylamino-4,6-dinitrotoluene	C16392; C16393	C7H7N3O5	-H(-)	45
142	212.979	77762.7	0.491097	2-Oxo-3-hydroxy-4-phosphobutanoate	C06054	C4H7O8P	-H(-)	82
143	213.016	49064.9	0.824789	2-Deoxy-D-ribose 1-phosphate; 2-Deoxy-D-ribose 5-phosphate	C00672; C00673; C11437; C16637	C5H11O7P	-H(-)	100
144	213.126	25169	0.862358	Dethiobiotin	C01909	C10H18N2O3	-H(-)	76
145	214.012	69494.8	0.864391	O-Phospho-4-hydroxy-L-threonine	C06055	C4H10NO7P	-H(-)	100
146	214.048	148754	0.956804	sn-Glycero-3-phosphoethanolamine	C01233	C5H14NO6P	-H(-)	100
147	215.02	64478.8	0.839115	5-Carboxy-2-oxohept-3-enedioate; 5-Carboxymethyl-2-hydroxymuconate	C04052; C04186	C8H8O7	-H(-)	100
148	215.033	373458	0.768266	2-C-Methyl-D-erythritol 4-phosphate	C11434	C5H13O7P	-H(-)	100
149	215.071	60224.1	0.892028	Bis(4-hydroxyphenyl)methanol	C18215	C13H12O3	-H(-)	100
150	218.033	46351.7	0.866039	4-Amino-2-methyl-5-phosphomethylpyrimidine	C04556	C6H10N3O4P	-H(-)	100
151	218.067	919507	0.953188	O-Succinyl-L-homoserine	C01118	C8H13NO6	-H(-)	100
152	218.103	226616	0.970577	Pantothenate	C00864	C9H17NO5	-H(-)	100
153	220.083	33910.3	0.921716	N-Acetyl-D-glucosamine; N-Acetyl-D-mannosamine; N-Acetyl-D-galactosamine	C00140; C00645; C01132	C8H15NO6	-H(-)	100
154	225.041	50308.6	0.834902	Chorismate; Prephenate	C00251; C00254	C10H10O6	-H(-)	100
155	225.087	50811.6	0.952874	Porphobilinogen	C00931	C10H14N2O4	-H(-)	100
156	226.012	49532	0.750699	L-Glutamyl 5-phosphate	C03287	C5H10NO7P	-H(-)	100
157	227.071	46389.6	0.91875	Resveratrol	C03582	C14H12O3	-H(-)	100
158	228.027	16320.3	0.323002	5-Phosphoribosylamine	C03090	C5H12NO7P	-H(-)	100
159	229.012	100393	0.943081	D-Ribose 5-phosphate; D-Ribulose 5-phosphate; D-Xylulose 5-phosphate; alpha...	C00117; C00199; C00231; C00620; C01112	C5H11O8P	-H(-)	100
160	235.073	75968	0.935797	L-Formylkynurenine	C02700	C11H12N2O4	-H(-)	100
161	237.061	353654	0.970279	3-Deoxy-D-manno-octulosonate	C01187	C8H14O8	-H(-)	100
162	238.094	31364.4	0.941231	Dihydrobiopterin	C00268	C9H13N5O3	-H(-)	100
163	243.027	140342	0.871689	L-Fuculose 1-phosphate	C01099	C6H13O8P	-H(-)	100
164	243.062	351467	0.968381	Uridine	C00299	C9H12N2O6	-H(-)	100
165	253.051	1.67267e+07	0.960019	5-L-Glutamyl-taurine	C05844	C7H14N2O6S	-H(-)	79
166	255.233	1.53656e+07	0.974118	Hexadecanoic acid	C00249	C16H32O2	-H(-)	100
167	258.039	30891.6	0.902305	D-Glucosamine 6-phosphate; alpha-D-Glucosamine 1-phosphate	C00352; C06156; C12214	C6H14NO8P	-H(-)	100
168	259.023	994535	0.958269	D-Fructose 6-phosphate; D-Glucose 6-phosphate; D-Glucose 1-phosphate	C00085; C00092; C00103; C00275; C00636; C00668; C01094; C01097; C01172; C01177; C02888; C03546; C04006; C05345	C6H13O9P	-H(-)	100
169	260.114	102172	0.942911	Lotaustralin	C08334	C11H19NO6	-H(-)	100
170	264.951	21082.9	0.42333	3-Phospho-D-glyceroyl phosphate	C00236	C3H8O10P2	-H(-)	84
171	267.073	740597	0.980219	Inosine	C00294	C10H12N4O5	-H(-)	100
172	277.123	90000.3	0.965212	Pantetheine	C00831	C11H22N2O4S	-H(-)	100
173	282.084	162805	0.966623	Guanosine	C00387	C10H13N5O5	-H(-)	100
174	283.206	16624.3	0.930105	Retinal	C00376	C20H28O	-H(-)	75
175	289.116	122496	0.87603	N-(L-Arginino)succinate	C03406	C10H18N4O6	-H(-)	100
176	292.104	40423.1	0.945812	N-Acetylmuramate	C02713	C11H19NO8	-H(-)	100
177	293.212	3.74422e+06	0.969378	13-OxoODE	C14765	C18H30O3	-H(-)	100
178	295.228	2.65331e+06	0.969195	13(S)-HODE	C14762	C18H32O3	-H(-)	100
179	298	15430.5	0.617608	2-Methyl-4-amino-5-hydroxymethylpyrimidine diphosphate	C04752	C6H11N3O7P2	-H(-)	100
180	298.069	41511.9	0.859156	D-4'-Phosphopantothenate	C03492	C9H18NO8P	-H(-)	100
181	300.049	147251	0.949787	N-Acetyl-D-mannosamine 6-phosphate; N-Acetyl-alpha-D-glucosamine 1-phosphate	C04257; C04501	C8H16NO9P	-H(-)	100
182	306.049	23222.6	0.92262	dCMP	C00239	C9H14N3O7P	-H(-)	100
183	312.059	72959.1	0.954695	2-(Formamido)-N1-(5'-phosphoribosyl)acetamidine	C04640	C8H16N3O8P	-H(-)	100
184	317.03	41155.4	0.848417	3-Deoxy-D-manno-octulosonate 8-phosphate	C04478	C8H15O11P	-H(-)	36
185	322.045	58903.1	0.923901	CMP	C00055	C9H14N3O8P	-H(-)	100
186	323.029	200626	0.9678	UMP	C00105	C9H13N2O9P	-H(-)	100
187	325.094	78476.8	0.964674	cis-beta-D-Glucosyl-2-hydroxycinnamate	C05839	C15H18O8	-H(-)	100
188	331.046	55454.6	0.877339	2'-Deoxyinosine 5'-phosphate	C06196	C10H13N4O7P	-H(-)	100
189	335.04	49668.3	0.829095	Nicotinate D-ribonucleotide	C01185	C11H15NO9P	-H(-)	44
190	338.038	18758.6	0.864848	1-(5-Phospho-D-ribosyl)-5-amino-4-imidazolecarboxylate	C04751; C15667	C9H14N3O9P	-H(-)	66
191	338.989	53602.3	0.0624607	D-Fructose 1,6-bisphosphate; D-Mannose 1,6-bisphosphate	C00354; C03693; C03785; C05378	C6H14O12P2	-H(-)	100
192	341.11	2.54339e+07	0.9298	Sucrose; Cellobiose; Maltose; alpha,alpha-Trehalose	C00089; C00185; C00208; C01083	C12H22O11	-H(-)	100
193	344.04	31341.4	0.866916	3',5'-Cyclic GMP	C00942	C10H12N5O7P	-H(-)	100
194	344.07	32706.7	0.946995	Thiamin monophosphate	C01081	C12H18N4O4PS	-H(-)	31
195	346.056	303383	0.964986	AMP; dGMP	C00020; C00362	C10H14N5O7P	-H(-)	100
196	348.087	27687.4	0.91578	S-(Formylmethyl)glutathione	C14871	C12H19N3O7S	-H(-)	100
197	354.001	11232.6	0.749736	2-Amino-7,8-dihydro-4-hydroxy-6-(diphosphooxymethyl)pteridine	C04807	C7H11N5O8P2	-H(-)	100
198	362.051	51138.7	0.865879	GMP; Precursor Z	C00144; C18239	C10H14N5O8P	-H(-)	100
199	363.035	49841.8	0.817112	Xanthosine 5'-phosphate	C00655	C10H13N4O9P	-H(-)	100
200	363.217	34318.9	0.947057	Tetrahydrocortisone	C05470	C21H32O5	-H(-)	100
201	367.249	86314	0.944006	Cortol	C05482	C21H36O5	-H(-)	100
202	375.13	135455	0.965742	Riboflavin	C00255	C17H20N4O6	-H(-)	85
203	379.013	34333.5	0.933592	6-Thioxanthine 5'-monophosphate	C16618	C10H13N4O8PS	-H(-)	100
204	388.066	14621.5	0.786215	Acetyl adenylate	C05993	C12H16N5O8P	-H(-)	100
205	402.011	25229.7	0.602976	CDP	C00112	C9H15N3O11P2	-H(-)	100
206	402.995	60899.4	0.718514	UDP	C00015	C9H14N2O12P2	-H(-)	100
207	421.077	309780	0.902883	alpha,alpha'-Trehalose 6-phosphate; alpha-Maltose 1-phosphate	C00689; C20237	C12H23O14P	-H(-)	36
208	426.022	188543	0.20881	ADP; Adenosine 3',5'-bisphosphate; dGDP	C00008; C00054; C00361	C10H15N5O10P2	-H(-)	100
209	442.017	16836	0.694759	GDP	C00035	C10H15N5O11P2	-H(-)	100
210	455.156	459068	0.963917	5,10-Methenyltetrahydrofolate	C00445	C20H22N7O6	-H(-)	100
211	472.159	48772.4	0.95456	10-Formyltetrahydrofolate; Folinic acid	C00234; C03479	C20H23N7O7	-H(-)	100
212	482.962	20568.8	0.466776	UTP	C00075	C9H15N2O15P3	-H(-)	100
213	490.976	19090.8	0.296218	dITP	C01345	C10H15N4O13P3	-H(-)	33
214	535.037	57939.6	0.938059	UDP-D-xylose	C00190	C14H22N2O16P2	-H(-)	100
215	561.252	38143.4	0.946949	Protoporphyrin	C02191	C34H34N4O4	-H(-)	100
216	565.048	285982	0.823373	UDP-glucose; UDP-alpha-D-galactose	C00029; C00052	C15H24N2O17P2	-H(-)	100
217	579.026	41702.4	0.507018	UDP-glucuronate; UDP-D-galacturonate	C00167; C00617	C15H22N2O18P2	-H(-)	100
218	588.075	9835.95	0.891732	GDP-L-fucose; ADP-glucose	C00325; C00498	C16H25N5O15P2	-H(-)	100
219	604.069	21140.6	0.880597	GDP-mannose	C00096	C16H25N5O16P2	-H(-)	100
220	606.075	63114.9	0.829784	UDP-N-acetyl-alpha-D-glucosamine; UDP-N-acetyl-D-mannosamine	C00043; C01170	C17H27N3O17P2	-H(-)	100
221	702.248	20961.6	0.948256	Tetrahydropteroyltri-L-glutamate	C04144	C29H37N9O12	-H(-)	100
222	716.264	13856.9	0.95865	5-Methyltetrahydropteroyltri-L-glutamate	C04489	C30H39N9O12	-H(-)	100
223	990.286	18472.6	0.526594	3-Oxotetradecanoyl-CoA	C05261	C35H60N7O18P3S	-H(-)	100
a Metabolite name and ID according to the KEGG database.

## Sheet: Table S2
Table S2. List of 132 metabolites with significantly elevated levels in B. diazoefficiens-induced nodules (soybean, siratro, cowpea and mungbean) compared to uninfected roots (soybean, siratro, cowpea and mungbean), as well as 21 metabolites showing increased levels in uninfected roots.
Metabolites a	m/z	Formula	log2(FC nod vs. root) b	q-Value (Storey) c	ID a
O-Succinyl-L-homoserine	218.067	C8H13NO6	5.04099	2.44392e-07	C01118
3-Oxotetradecanoyl-CoA	990.286	C35H60N7O18P3S	3.66263	4.89783e-17	C05261
L-Glutamate	146.046	C5H9NO4	3.39314	2.01076e-14	C00025
N-Acetyl-L-glutamate	188.056	C7H11NO5	3.33904	4.29198e-05	C00624
L-Glutamine	145.062	C5H10N2O3	3.32993	2.40966e-09	C00064
(R)-2-Methylmalate	147.03	C5H8O5	2.9863	4.71985e-09	C02612
O-Phospho-4-hydroxy-L-threonine	214.012	C4H10NO7P	2.95987	2.97641e-12	C06055
13(S)-HODE	295.228	C18H32O3	2.89836	3.16093e-07	C14762
4-Aminobutanoate	102.056	C4H9NO2	2.86567	3.82797e-13	C00334
D-Glucuronolactone	175.025	C6H8O6	2.86114	1.16691e-08	C02670
N-(L-Arginino)succinate	289.116	C10H18N4O6	2.82309	7.15355e-12	C03406
3-Phosphonooxypyruvate	182.97	C3H5O7P	2.75606	1.09993e-05	C03232
L-Histidinol	140.083	C6H11N3O	2.62055	0.0022739	C00860
alpha-Isopropylmalate	175.061	C7H12O5	2.58476	2.34067e-08	C02504
O-Phospho-L-serine	184.001	C3H8NO6P	2.55981	7.05241e-13	C01005
Pantetheine	277.123	C11H22N2O4S	2.51559	2.13746e-15	C00831
2-Oxoglutarate	145.014	C5H6O5	2.46146	2.11826e-06	C00026
(R)(-)-Allantoin	157.036	C4H6N4O3	2.44297	6.76754e-05	C02348
L-Citrulline	174.088	C6H13N3O3	2.41441	6.63266e-16	C00327
Fumarate	115.004	C4H4O4	2.32597	1.49657e-13	C00122
(S)-Ureidoglycine	132.042	C3H7N3O3	2.31101	1.10407e-06	C02091
L-Cysteate	167.997	C3H7NO5S	2.30848	9.54326e-17	C00506
Guanosine	282.084	C10H13N5O5	2.30055	2.61584e-10	C00387
ADP	426.022	C10H15N5O10P2	2.25787	2.04262e-06	C00008
AMP	346.056	C10H14N5O7P	2.25108	3.77287e-05	C00020
Anthranilate	136.04	C7H7NO2	2.20279	5.23009e-07	C00108
Shikimate	173.045	C7H10O5	2.13302	1.66106e-09	C00493
5,6-Dihydrothymine	127.051	C5H8N2O2	2.11726	1.18787e-09	C00906
Pantothenate	218.103	C9H17NO5	2.09617	1.57967e-06	C00864
(S)-Malate	133.015	C4H6O5	1.9805	4.21314e-18	C00149
Succinate	117.019	C4H6O4	1.95418	4.71653e-14	C00042
Glycerol	91.0399	C3H8O3	1.85318	6.02904e-09	C00116
Uridine	243.062	C9H12N2O6	1.84	1.36295e-05	C00299
UMP	323.029	C9H13N2O9P	1.81607	1.25909e-05	C00105
D-Glucono-1,5-lactone	177.04	C6H10O6	1.7756	6.02904e-09	C00198
2-Oxoadipate	159.03	C6H8O5	1.77136	3.57532e-10	C00322
N-Acetylmuramate	292.104	C11H19NO8	1.75929	9.34762e-13	C02713
D-Glucarate	209.03	C6H10O8	1.7369	0.000737925	C00818
GDP-mannose	604.069	C16H25N5O16P2	1.73194	2.69525e-09	C00096
Iminoglycine	72.0093	C2H3NO2	1.70746	0.000626107	C15809
4-Acetamidobutanoate	144.067	C6H11NO3	1.68646	7.71708e-06	C02946
GMP	362.051	C10H14N5O8P	1.65189	0.000114951	C00144
Pyruvate	87.0087	C3H4O3	1.62645	4.95211e-11	C00022
D-Glucose	179.056	C6H12O6	1.59826	3.12864e-07	C00031
13-OxoODE	293.212	C18H30O3	1.5512	8.97336e-07	C14765
Lotaustralin	260.114	C11H19NO6	1.54571	0.00101223	C08334
Allantoate	175.047	C4H8N4O4	1.54172	3.03561e-06	C00499
N-Acetyl-D-glucosamine	220.083	C8H15NO6	1.53589	2.71716e-11	C00140
Acrylic acid	71.014	C3H4O2	1.47543	3.51742e-11	C00511
2-Methyl-4-amino-5-hydroxymethylpyrimidine diphosphate	298	C6H11N3O7P2	1.47541	1.72938e-10	C04752
D-Galacturonate	193.035	C6H10O7	1.46693	2.55671e-06	C00333
Xanthine	151.026	C5H4N4O2	1.46156	5.35117e-10	C00385
Benzene-1,2,4-triol	125.024	C6H6O3	1.44795	9.54326e-17	C02814
CMP	322.045	C9H14N3O8P	1.44481	7.74721e-07	C00055
L-Proline	114.056	C5H9NO2	1.44459	2.13746e-15	C00148
N4-Acetylaminobutanal	128.071	C6H11NO2	1.43668	0.00127692	C05936
N-Acetyl-L-glutamate 5-semialdehyde	172.061	C7H11NO4	1.41364	2.45122e-05	C01250
UDP	402.995	C9H14N2O12P2	1.40758	2.07085e-07	C00015
2,3,4,5-Tetrahydrodipicolinate	170.046	C7H9NO4	1.40233	3.37949e-08	C03972
L-1-Pyrroline-3-hydroxy-5-carboxylate	128.036	C5H7NO3	1.36592	1.27845e-10	C04281
Pyridoxal	166.05	C8H9NO3	1.33707	5.32247e-15	C00250
Glyoxylate	72.9934	C2H2O3	1.3358	7.79008e-09	C00048
UDP-glucuronate	579.026	C15H22N2O18P2	1.32802	1.49657e-13	C00167
CDP	402.011	C9H15N3O11P2	1.32516	5.46335e-06	C00112
L-Glutamyl 5-phosphate	226.012	C5H10NO7P	1.31586	8.87834e-05	C03287
2-Amino-7,8-dihydro-4-hydroxy-6-(diphosphooxymethyl)pteridine	354.001	C7H11N5O8P2	1.30862	2.02782e-07	C04807
2-Dehydro-3-deoxy-L-fuconate	161.045	C6H10O5	1.30579	4.8466e-15	C03827
2-Phosphoglycolate	154.975	C2H5O6P	1.28126	6.69801e-08	C00988
GDP	442.017	C10H15N5O11P2	1.23439	4.73693e-10	C00035
Dopamine	152.071	C8H11NO2	1.22064	3.43838e-15	C03758
2-Oxo-3-hydroxy-4-phosphobutanoate	212.979	C4H7O8P	1.19754	1.25909e-05	C06054
10-Formyltetrahydrofolate	472.159	C20H23N7O7	1.16599	1.3595e-06	C00234
3-Phospho-D-glycerate	184.985	C3H7O7P	1.13099	4.52321e-10	C00197
L-2-Aminoadipate	160.061	C6H11NO4	1.11783	6.57824e-09	C00956
sn-Glycerol 3-phosphate	171.006	C3H9O6P	1.11391	0.000460326	C00093
Glycolate	75.0089	C2H4O3	1.09197	9.15499e-08	C00160
UDP-glucose	565.048	C15H24N2O17P2	1.0693	3.0949e-05	C00029
2-Isopropylmaleate	157.05	C7H10O4	1.03367	2.42645e-08	C02631
4-Hydroxylamino-2,6-dinitrotoluene	212.03	C7H7N3O5	1.01424	0.0015474	C16392
4-Phospho-L-aspartate	211.997	C4H8NO7P	1.00265	2.61826e-06	C03082
3-Deoxy-D-manno-octulosonate	237.061	C8H14O8	0.967428	6.02904e-09	C01187
N-Formimino-L-glutamate	173.057	C6H10N2O4	0.93245	3.00555e-06	C00439
3-Dehydroshikimate	171.03	C7H8O5	0.920234	7.36786e-14	C02637
Propanoate	73.0294	C3H6O2	0.897101	3.60021e-13	C00163
Tyramine	136.076	C8H11NO	0.892736	2.75652e-18	C00483
N-Acetylputrescine	129.103	C6H14N2O	0.892642	0.000348795	C02714
2-Oxobutanoate	101.025	C4H6O3	0.877351	4.54295e-07	C00109
L-Serine	104.035	C3H7NO3	0.837028	0.000107344	C00065
GDP-L-fucose	588.075	C16H25N5O15P2	0.826133	3.28997e-07	C00325
D-Fructose 6-phosphate	259.023	C6H13O9P	0.824729	1.25909e-05	C00085
3-Dehydroquinate	189.041	C7H10O6	0.81618	1.05192e-07	C00944
(R)-3-Hydroxybutanoate	103.04	C4H8O3	0.805583	0.000682222	C01089
2-Maleylacetate	157.014	C6H6O5	0.797867	2.39705e-07	C02222
Benzoate	121.03	C7H6O2	0.793249	4.16615e-05	C00180
5-Methylthio-D-ribose	179.038	C6H12O4S	0.786104	2.44392e-07	C03089
Acetone	57.0346	C3H6O	0.784611	5.59566e-10	C00207
D-Ribose 5-phosphate	229.012	C5H11O8P	0.781875	1.4356e-07	C00117
Indole-3-acetaldehyde	158.061	C10H9NO	0.776602	9.15499e-08	C00637
Citrate	191.02	C6H8O7	0.770858	0.00117818	C00158
3,4-Dihydroxybenzoate	153.019	C7H6O4	0.759703	9.42867e-05	C00230
D-Gluconic acid	195.051	C6H12O7	0.742588	1.54161e-05	C00257
3-Methyl-cis,cis-hexadienedioate	155.035	C7H8O4	0.732197	0.00265466	C04112
Imidazole-4-acetaldehyde	109.041	C5H6N2O	0.731202	0.000337625	C05130
2-Propyn-1-ol	55.0189	C3H4O	0.730759	3.334e-07	C05986
4-Amino-2-methyl-5-phosphomethylpyrimidine	218.033	C6H10N3O4P	0.707085	0.000107344	C04556
Sucrose	341.11	C12H22O11	0.699161	2.13746e-15	C00089
L-Aspartate 4-semialdehyde	116.035	C4H7NO3	0.682673	1.26719e-07	C00441
Glycerone	89.0244	C3H6O3	0.674873	7.4558e-06	C00184
2,5-Dioxopentanoate	129.019	C5H6O4	0.663721	1.79708e-07	C00433
4-Methyl-2-oxopentanoate	129.055	C6H10O3	0.660544	0.000107344	C00233
Butanoic acid	87.0451	C4H8O2	0.650048	2.61826e-06	C00246
cis-Aconitate	173.009	C6H6O6	0.630391	0.000213403	C00417
2-Furoate	111.009	C5H4O3	0.628131	0.00317995	C01546
Benzamide	120.045	C7H7NO	0.622688	7.59486e-07	C09815
2-Hydroxymuconate semialdehyde	141.019	C6H6O4	0.606742	2.75321e-08	C00682
D-Glucosamine 6-phosphate	258.039	C6H14NO8P	0.594063	7.49073e-06	C00352
Dethiobiotin	213.126	C10H18N2O3	0.588	2.11142e-05	C01909
cis-3-(Carboxy-ethyl)-3,5-cyclo-hexadiene-1,2-diol	183.066	C9H12O4	0.581063	2.21288e-10	C11588
Riboflavin	375.13	C17H20N4O6	0.571411	0.00898811	C00255
Glycine	74.0248	C2H5NO2	0.570155	0.00721016	C00037
2,4-Diamino-6-nitrotoluene	166.06	C7H9N3O2	0.569688	7.49681e-06	C16396
(S)-4-Hydroxymandelonitrile	148.042	C8H7NO2	0.56646	1.07719e-08	C03742
7-Cyano-7-carbaguanine	174.041	C7H5N5O	0.537435	0.00282901	C15996
Pyridoxamine	167.082	C8H12N2O2	0.536098	8.91041e-06	C00534
Acetyl adenylate	388.066	C12H16N5O8P	0.533277	4.34519e-06	C05993
2-Dehydropantoate	145.05	C6H10O4	0.533071	6.95213e-07	C00966
5-Hydroxyindoleacetate	190.05	C10H9NO3	0.531271	4.29198e-05	C05635
5-Aminolevulinate	130.051	C5H9NO3	0.531266	0.00453793	C00430
UDP-D-xylose	535.037	C14H22N2O16P2	0.526068	0.000213403	C00190
Ribitol	151.061	C5H12O5	0.52592	5.7084e-07	C00474
1-(5-Phospho-D-ribosyl)-5-amino-4-imidazolecarboxylate	338.038	C9H14N3O9P	0.514743	0.000878558	C04751
Lipoamide	204.052	C8H15NOS2	0.504222	9.08268e-06	C00248
S-(Formylmethyl)glutathione	348.087	C12H19N3O7S	-0.512799	0.00237484	C14871
4-Nitrophenol	138.019	C6H5NO3	-0.522928	0.000510321	C00870
5-L-Glutamyl-taurine	253.051	C7H14N2O6S	-0.667736	0.000639173	C05844
Thiamin monophosphate	344.07	C12H18N4O4PS	-0.701765	2.97167e-06	C01081
Phenylacetaldehyde	119.05	C8H8O	-0.707482	0.00987857	C00601
Bis(4-hydroxyphenyl)methanol	215.071	C13H12O3	-0.760706	0.000511305	C18215
Nicotinate D-ribonucleotide	335.04	C11H15NO9P	-0.808998	0.000109342	C01185
Xanthosine 5'-phosphate	363.035	C10H13N4O9P	-0.868917	0.00230367	C00655
Hippurate	178.051	C9H9NO3	-0.875806	0.00529582	C01586
Hydroxypyruvate	103.003	C3H4O4	-0.969413	0.000408225	C00168
Phenylpyruvate	163.039	C9H8O3	-0.973996	0.00199262	C00166
Resveratrol	227.071	C14H12O3	-1.16462	1.05447e-05	C03582
5-Carboxy-2-oxohept-3-enedioate	215.02	C8H8O7	-1.16965	0.000183178	C04052
2-Deoxy-D-ribose 1-phosphate	213.016	C5H11O7P	-1.17477	9.95345e-05	C00672
L-Histidine	154.062	C6H9N3O2	-1.40929	0.00893739	C00135
L-Tryptophan	203.082	C11H12N2O2	-1.45194	0.00109255	C00078
2-(Formamido)-N1-(5'-phosphoribosyl)acetamidine	312.059	C8H16N3O8P	-1.53928	0.000626107	C04640
N-Cyclohexylformamide	126.092	C7H13NO	-1.56413	0.00300842	C11519
2-C-Methyl-D-erythritol 4-phosphate	215.033	C5H13O7P	-1.58639	0.00283545	C11434
Urea-1-carboxylate	103.016	C2H4N2O3	-1.74775	3.5087e-05	C01010
5,10-Methenyltetrahydrofolate	455.156	C20H22N7O6	-2.63196	0.0022739	C00445
a Metabolite name and ID according to the KEGG database. To identify nodule-specific compounds, the metabolite levels measured in all nodules samples (soybean, mungbean, cowpea and siratro) were compared with the level in all root samples (soybean, mungbean, cowpea and siratro). The significance of all univariate tests was assessed by a t-test (two-tailed, heteroscedastic) and a FDR correction ac…
b Log2 Fold change (FC) of metabolite level, comparing all nodules with all roots.
c q-value calculated according to Storey et al. 2003 (Storey, J.D.; Tibshirani, R. Statistical significance for genomewide studies. PNAS 2003, 100, 9440–9445).
In bold the metabolites which are ambiguous are labeled (s. Materials and Methods section)

## Sheet: Table S3
Table S3. Four clusters of B. diazoefficiens -induced nodules metabolites that are differentially accumulated in one host plants.
Cluster I. Metabolites accumulated in soybean nodules and/or soybean roots
Metabolites a	Formula	m/z	Log2(soybean nod vs. all nod) b	q-Value	Log2(soybean roots vs all roots) c	q-Value d	ID a
5,10-Methenyltetrahydrofolate	C20H22N7O6	455.156	3.36255	4.16237e-06	6.38297	0.000324944	C00445
L-Asparagine	C4H8N2O3	131.046	5.32021	0.000136936	ns		C00152
D-Ribose	C5H10O5	149.046	4.84048	9.41073e-07	4.43203	0.000347625	C00121
5,6-Dihydrouracil	C4H6N2O2	113.036	4.38169	0.000165429	ns		C00429
L-Histidinol	C6H11N3O	140.083	4.10298	0.00492405	ns		C00860
L-Histidine	C6H9N3O2	154.062	3.09144	0.007017	3.96637	0.00944928	C00135
N-Cyclohexylformamide	C7H13NO	126.092	1.34484	2.3317e-05	3.93024	0.000600604	C11519
Riboflavin	C17H20N4O6	375.13	1.14271	1.03992e-07	3.63374	0.000293966	C00255
L-Valine	C5H11NO2	116.072	1.58494	3.91625e-06	3.36443	0.00628201	C00183
2-C-Methyl-D-erythritol 4-phosphate	C5H13O7P	215.033	2.13335	0.000397242	3.2752	0.00323629	C11434
L-Leucine	C6H13NO2	130.087	1.94843	1.14056e-09	3.11906	0.00993465	C00123
Tetrahydropteroyltri-L-glutamate	C29H37N9O12	702.248	2.53637	3.33518e-05	ns		C04144
Iminoglycine	C2H3NO2	72.0093	2.49014	0.000546888	ns		C15809
(R)(-)-Allantoin	C4H6N4O3	157.036	2.38949	0.000779685	ns		C02348
Xanthosine 5'-phosphate	C10H13N4O9P	363.035	ns		2.32333	0.000268401	C00655
4-Hydroxylamino-2,6-dinitrotoluene	C7H7N3O5	212.03	2.15249	0.00264312	ns		C16392
L-Threonine	C4H9NO3	118.051	1.99001	2.39215e-05	ns		C00188
L-Glutamyl 5-phosphate	C5H10NO7P	226.012	1.94883	2.78367e-06	ns		C03287
Uridine	C9H12N2O6	243.062	1.88273	5.37502e-06	ns		C00299
D-Glucose	C6H12O6	179.056	1.16323	1.07459e-09	1.74682	0.000964189	C00031
(S)-Ureidoglycine	C3H7N3O3	132.042	1.71994	0.000111674	ns		C02091
N4-Acetylaminobutanal	C6H11NO2	128.071	ns		1.69247	0.00368916	C05936
4-Amino-2-methyl-5-phosphomethylpyrimidine	C6H10N3O4P	218.033	ns		1.68725	0.00318323	C04556
(R)-3-Hydroxybutanoate	C4H8O3	103.04	1.29555	3.06378e-05	1.68414	0.00210078	C01089
Glycine	C2H5NO2	74.0248	1.46855	0.000169068	ns		C00037
Hydroxypyruvate	C3H4O4	103.003	1.68431	1.40528e-10	1.41057	0.00439877	C00168
Cortol	C21H36O5	367.249	1.14661	7.53084e-05	1.39355	0.00420123	C05482
13-OxoODE	C18H30O3	293.212	1.37952	3.84172e-05	1.34877	0.0048783	C14765
1-(5-Phospho-D-ribosyl)-5-amino-4-imidazolecarboxylate	C9H14N3O9P	338.038	1.33694	1.22337e-10	ns		C04751
Pantetheine	C11H22N2O4S	277.123	ns		1.33363	0.00126332	C00831
N-Acetylornithine	C7H14N2O3	173.093	1.43555	2.13872e-06	1.32949	0.00623157	C00437
Protoporphyrin	C34H34N4O4	561.252	1.12684	6.7094e-09	1.32385	9.33124e-05	C02191
5-L-Glutamyl-taurine	C7H14N2O6S	253.051	1.06607	1.76449e-07	1.31435	6.87554e-06	C05844
Bis(4-hydroxyphenyl)methanol	C13H12O3	215.071	0.831654	2.16212e-05	1.28582	0.00567515	C18215
UDP-N-acetyl-alpha-D-glucosamine	C17H27N3O17P2	606.075	ns		1.25725	1.18417e-07	C00043
D-Glucarate	C6H10O8	209.03	3.04524	8.31116e-05	1.24361	1.18417e-07	C00818
L-Formylkynurenine	C11H12N2O4	235.073	nr		1.22961	0.000521217	C02700
Ethanolamine phosphate	C2H8NO4P	140.012	dr		1.14306	0.00252593	C00346
L-Serine	C3H7NO3	104.035	1.35353	1.29486e-05	1.14206	0.00484529	C00065
Glycerone	C3H6O3	89.0244	0.677121	6.67579e-06	1.12202	0.00313893	C00184
13(S)-HODE	C18H32O3	295.228	1.66008	0.000158025	1.08009	0.00814014	C14762
L-Proline	C5H9NO2	114.056	nr		1.07428	0.0011205	C00148
4-Phospho-L-aspartate	C4H8NO7P	211.997	1.10598	4.52901e-05	1.07132	0.00567515	C03082
N-Formimino-L-glutamate	C6H10N2O4	173.057	1.06231	4.48205e-07	ns		C00439
Succinate	C4H6O4	117.019	dr		0.960148	0.000324944	C00042
Butanoic acid	C4H8O2	87.0451	nr		0.942903	0.00334006	C00246
3-Deoxy-D-manno-octulosonate 8-phosphate	C8H15O11P	317.03	ns		0.916033	0.000724482	C04478
Dopamine	C8H11NO2	152.071	nr		0.869712	0.00378059	C03758
Indole-3-acetaldehyde	C10H9NO	158.061	ns		0.865461	0.00591396	C00637
Benzene-1,2,4-triol	C6H6O3	125.024	nr		0.844775	0.000140048	C02814
1-Aminocyclopropane-1-carboxylate	C4H7NO2	100.04	0.879258	0.00180454	0.727901	0.00628201	C01234
4-Aminobutanoate	C4H9NO2	102.056	0.694548	3.63263e-05	0.709458	8.51009e-05	C00334
2-Hydroxymuconate semialdehyde	C6H6O4	141.019	ns		0.702464	4.57644e-05	C00682
Pyridoxal	C8H9NO3	166.05	nr		0.690781	0.000918772	C00250
L-1-Pyrroline-3-hydroxy-5-carboxylate	C5H7NO3	128.036	0.663656	2.61267e-06	nr		C04281
3-Dehydroquinate	C7H10O6	189.041	0.619783	0.000752137	ns		C00944
5,6-Dihydrothymine	C5H8N2O2	127.051	0.617946	0.000124961	ns		C00906
3-Deoxy-D-manno-octulosonate	C8H14O8	237.061	0.707257	1.35924e-09	0.611762	0.00183936	C01187
Chorismate	C10H10O6	225.041	0.607041	0.00209627	nr		C00251
dCMP	C9H14N3O7P	306.049	0.83336	0.000239746	0.565434	0.000459977	C00239
L-Citrulline	C6H13N3O3	174.088	nr		0.556127	0.00494221	C00327
L-Phenylalanine	C9H11NO2	164.072	0.5463	9.11142e-06	ns		C00079
alpha,alpha'-Trehalose 6-phosphate	C12H23O14P	421.077	0.535287	0.00188438	nr		C00689
Pyridoxamine	C8H12N2O2	167.082	0.508128	3.20767e-05	0.52644	0.000721796	C00534
Indole-3-acetate	C10H9NO2	174.056	nr		0.515542	0.00639762	C00954
Tetrahydrocortisone	C21H32O5	363.217	0.506409	0.000140163	ns		C05470
Formylanthranilate	C8H7NO3	164.035	0.505925	9.59221e-07	nr		C05653
Cluster II. Metabolites accumulated in mungbean nodules and/or mungbean roots
Metabolites	Formula	m/z	Log2(mungbean nod vs. all nod)	q-Value	Log2(mungbean roots vs. all roots)	q-Value	ID
meso-Tartaric acid	C4H6O6	149.009	2.9897	6.04545e-06	3.64525	0.00020058	C00552
Phenylacetaldehyde	C8H8O	119.05	2.75726	3.8513e-06	2.74413	3.30745e-05	C00601
GMP	C10H14N5O8P	362.051	2.19033	6.08573e-06	ns		C00144
trans-Cinnamate	C9H8O2	147.045	2.10348	1.47225e-06	3.47854	2.64554e-05	C00423
3-Phosphonooxypyruvate	C3H5O7P	182.97	1.99518	2.95565e-05	0.662165	0.00546658	C03232
Naphthalene-1,2-diol	C10H8O2	159.045	1.82437	1.254e-08	3.8424	2.64554e-05	C03012
Imidazole-4-acetaldehyde	C5H6N2O	109.041	nr		1.81232	0.00151407	C05130
N-Acetylputrescine	C6H14N2O	129.103	1.74668	1.95217e-05	1.01734	0.000238919	C02714
Thymine	C5H6N2O2	125.036	nr		1.64274	0.000603964	C00178
Anthranilate	C7H7NO2	136.04	1.59533	1.14251e-05	ns		C00108
D-Galacturonate	C6H10O7	193.035	1.41779	5.94755e-05	0.666479	4.12485e-05	C00333
Phenol	C6H6O	93.0344	1.39615	2.49006e-06	2.24532	7.12356e-05	C00146
Orotate	C5H4N2O4	155.009	nr		1.37094	0.000264976	C00295
3,4-Dihydroxybenzoate	C7H6O4	153.019	1.31997	1.74776e-05	dr		C00230
Toluate	C8H8O2	135.045	nr		1.16849	0.000482172	C01454
Citrate	C6H8O7	191.02	1.03849	6.56128e-05	ns		C00158
2-Furoate	C5H4O3	111.009	0.994742	0.000354383	ns		C01546
cis-Aconitate	C6H6O6	173.009	0.979697	9.26328e-08	nr		C00417
Dethiobiotin	C10H18N2O3	213.126	nr		0.787801	0.00139734	C01909
Nicotinamide	C6H6N2O	121.041	0.769864	4.61209e-08	2.49065	0.000482172	C00153
2-Phosphoglycolate	C2H5O6P	154.975	0.730397	0.000160652	ns		C00988
O-Phospho-L-serine	C3H8NO6P	184.001	0.6971	0.000954515	ns		C01005
Ectoine	C6H10N2O2	141.068	dr		0.643083	0.000857626	C06231
Hippurate	C9H9NO3	178.051	0.631753	1.60434e-05	ns		C01586
Urate	C5H4N4O3	167.021	0.615295	0.000354383	ns		C00366
Uracil	C4H4N2O2	111.021	0.610951	0.000676291	2.46071	0.00081377	C00106
5-Methylthio-D-ribose	C6H12O4S	179.038	0.578363	2.40521e-06	ns		C03089
Fumarate	C4H4O4	115.004	0.563432	2.49006e-06	dr		C00122
Acrylic acid	C3H4O2	71.014	0.544835	0.00015017	dr		C00511
3-Phospho-D-glyceroyl phosphate	C3H8O10P2	264.951	0.539584	6.84533e-05	ns		C00236
Cluster III. Metabolites accumulated in siratro nodules and/or siratro roots
Metabolites	Formula	m/z	Log2(siratro nod vs. all nod)	q-Value	Log2(siratro roots vs. all roots)	q-Value	ID
(R)-3-((R)-3-Hydroxybutanoyloxy)butanoate	C8H14O5	189.077	3.90656	8.04725e-06	4.82812	0.00167907	C04546
D-Gluconic acid	C6H12O7	195.051	dr		1.61601	0.0088571	C00257
cis-beta-D-Glucosyl-2-hydroxycinnamate	C15H18O8	325.094	1.18306	0.000586601	1.59826	0.00897842	C05839
4-Methyl-2-oxopentanoate	C6H10O3	129.055	0.934598	2.74362e-05	1.47522	4.92474e-05	C00233
UTP	C9H15N2O15P3	482.962	1.35108	9.88038e-08	dr		C00075
Nicotinate D-ribonucleotide	C11H15NO9P	335.04	nr		1.23754	0.00968237	C01185
10-Formyltetrahydrofolate	C20H23N7O7	472.159	1.16685	7.68567e-05	ns		C00234
4-Nitrophenol	C6H5NO3	138.019	ns		1.04132	0.00352544	C00870
Pantothenate	C9H17NO5	218.103	1.54436	0.000274741	0.983168	2.86092e-07	C00864
Shikimate	C7H10O5	173.045	0.95336	3.72567e-05	ns		C00493
UDP	C9H14N2O12P2	402.995	0.892722	2.18105e-06	ns		C00015
2-Maleylacetate	C6H6O5	157.014	ns		0.819666	0.000110666	C02222
D-Glucosamine 6-phosphate	C6H14NO8P	258.039	0.763888	0.000104129	nr		C00352
D-Glucuronolactone	C6H8O6	175.025	0.724957	0.0069087	nr		C02670
3-Phospho-D-glycerate	C3H7O7P	184.985	0.628751	7.03478e-07	ns		C00197
8-Amino-7-oxononanoate	C9H17NO3	186.113	0.541453	0.000169193	ns		C01092
6-Thioxanthine 5'-monophosphate	C10H13N4O8PS	379.013	0.530227	0.000274741	ns		C16618
Cluster IV. Metabolites accumulated in cowpea nodules and/or cowpea roots
Metabolites	Formula	m/z	Log2(cowpea nod vs. all nod)	q-Value	Log2(cowpea roots vs. all roots)	q-Value	ID
3-Methyl-cis,cis-hexadienedioate	C7H8O4	155.035	1.71395	1.42687e-09	1.72022	2.49181e-08	C04112
3-Carbamoyl-2-phenylpropionaldehyde	C10H11NO3	192.066	dr		1.67346	0.00499825	C16587
2-Deoxy-D-ribose 1-phosphate	C5H11O7P	213.016	nr		1.38702	0.00238049	C00672
Catechol	C6H6O2	109.03	1.32375	0.000121731	0.744047	2.02789e-05	C00090
Resveratrol	C14H12O3	227.071	ns		1.25645	6.86774e-05	C03582
Benzamide	C7H7NO	120.045	ns		1.04863	7.35277e-08	C09815
2,5-Dioxopentanoate	C5H6O4	129.019	ns		0.876549	0.000116474	C00433
Pyruvate	C3H4O3	87.0087	ns		0.771455	3.39337e-06	C00022
5-Hydroxyindoleacetate	C10H9NO3	190.05	0.72633	0.00207813	0.524245	0.000273638	C05635
GDP-L-fucose	C16H25N5O15P2	588.075	0.718404	0.00522873	nr		C00325
Thiamin monophosphate	C12H18N4O4PS	344.07	nr		0.664176	0.0033667	C01081
UDP-D-xylose	C14H22N2O16P2	535.037	0.606347	0.000892994	nr		C00190
cis-Acetylacrylate	C5H6O3	113.025	0.588981	0.000401213	nr		C07091
3-Oxotetradecanoyl-CoA	C35H60N7O18P3S	990.286	ns		0.579844	0.00720393	C05261
3-Dehydroshikimate	C7H8O5	171.03	ns		0.545982	0.00010198	C02637
2-Propyn-1-ol	C3H4O	55.0189	0.518583	0.00885534	0.731486	0.000169121	C05986
4-Hydroxyphenylglyoxylate	C8H6O4	165.019	nr		0.518374	0.000289286	C03590
a Metabolite name and ID according to the KEGG database.
b Log2 Fold change (FC) of metabolite level, comparing nodule from one host plant with nodules of the remaining three host plant.
c Log2 Fold change (FC) of metabolite level, comparing roots from one host plant with roots of the remaining three host plant.
d q-value calculated according to Storey et al. 2003 (Storey, J.D.; Tibshirani, R. Statistical significance for genomewide studies. PNAS 2003, 100, 9440–9445).
In bold the metabolites which are accumulating in all nodule vs all roots (Table S2) are indicated.
nr = not regulated.
ns = not significantly regulated (q-value ³ 0.01).
With a gray shadow the metabolites accumulating only in the specified nodules and not in the respective roots are indicated.

## Sheet: Table S4
Table S4. Metabolites differentially accumulating in soybean nodules induced by B. diazoefficiens nifH and nifA mutants.
Metabolites a	Formula	m/z	Log2(nifH Nod vs. wt Nod) b	q-Value (Storey) c	Log2(nifA Nod vs. wt Nod) b	q-Value (Storey) c	ID a
L-Asparagine	C4H8N2O3	131.046	-5.25574	0.000144072	-7.10229	5.07589e-05	C00152
5,6-Dihydrouracil	C4H6N2O2	113.036	-4.58128	0.000167907	-5.48455	5.96949e-05	C00429
L-Histidinol	C6H11N3O	140.083	-4.20387	0.00397187	-4.16366	0.00177422	C00860
L-Glutamine	C5H10N2O3	145.062	-4.12898	2.67297e-06	-4.1956	1.08321e-06	C00064
Allantoate	C4H8N4O4	175.047	-4.12484	3.92884e-05	-4.52773	1.44385e-05	C00499
Iminoglycine	C2H3NO2	72.0093	-4.03241	0.000312379	-4.77394	0.000115439	C15809
(R)(-)-Allantoin	C4H6N4O3	157.036	-3.89753	0.000412053	-5.25934	0.000143026	C02348
(S)-Ureidoglycine	C3H7N3O3	132.042	-2.88978	4.85147e-05	-4.06316	1.45209e-05	C02091
5,6-Dihydrothymine	C5H8N2O2	127.051	-2.79976	1.85979e-06	-3.23176	1.08321e-06	C00906
N-Acetyl-L-glutamate	C7H11NO5	188.056	-2.56944	4.02528e-06	-3.14052	2.44729e-06	C00624
L-Histidine	C6H9N3O2	154.062	-2.54704	0.00682268	-1.63397	0.00564666	C00135
4-Aminobutanoate	C4H9NO2	102.056	-2.13976	1.85979e-06	-1.43075	1.46061e-06	C00334
L-Serine	C3H7NO3	104.035	-2.1176	7.77575e-06	-1.73178	7.67273e-07	C00065
L-Homoserine	C4H9NO3	118.051	-2.00522	1.07399e-05	-2.43828	8.08642e-06	C00263
L-Leucine	C6H13NO2	130.087	-2.00429	7.0507e-08	-0.760011	7.7866e-06	C00123
4-Acetamidobutanoate	C6H11NO3	144.067	-1.97241	1.07399e-05	-1.20255	7.64557e-06	C02946
Imidazole-4-acetaldehyde	C5H6N2O	109.041	-1.96873	2.41698e-05	-2.21275	7.34039e-06	C05130
L-Glutamate	C5H9NO4	146.046	-1.88188	2.35687e-07	-2.12198	7.43162e-07	C00025
Xanthine	C5H4N4O2	151.026	-1.8163	2.01027e-05	-2.01409	7.38001e-06	C00385
Glycine	C2H5NO2	74.0248	-1.78488	0.000105097	-1.67841	3.51035e-05	C00037
Lotaustralin	C11H19NO6	260.114	-1.68191	3.14446e-06	-2.35479	9.73659e-07	C08334
L-Valine	C5H11NO2	116.072	-1.66541	4.02528e-06	-1.06085	4.11484e-06	C00183
L-1-Pyrroline-3-hydroxy-5-carboxylate	C5H7NO3	128.036	-1.65468	2.66708e-06	-1.86829	1.46061e-06	C04281
L-Cysteate	C3H7NO5S	167.997	-1.64139	0.000107768	-2.79587	2.1522e-05	C00506
L-Citrulline	C6H13N3O3	174.088	-1.6202	4.53261e-09	-2.43601	1.25026e-08	C00327
2-C-Methyl-D-erythritol 4-phosphate	C5H13O7P	215.033	-1.55851	0.000679315	-1.16535	0.000409975	C11434
L-Glutamyl 5-phosphate	C5H10NO7P	226.012	-1.43288	7.51645e-06	-2.15489	3.32595e-06	C03287
7-Cyano-7-carbaguanine	C7H5N5O	174.041	-1.40198	3.19949e-07	-0.652137	2.62762e-06	C15996
N4-Acetylaminobutanal	C6H11NO2	128.071	-1.33479	6.09006e-07	-1.54902	5.82502e-07	C05936
L-2-Aminoadipate	C6H11NO4	160.061	-1.30395	2.35687e-07	-1.89763	1.8392e-08	C00956
L-Proline	C5H9NO2	114.056	-1.29304	7.0507e-08	-1.49218	4.24557e-09	C00148
L-Phenylalanine	C9H11NO2	164.072	-1.26591	1.07861e-06	-1.0263	0.000116014	C00079
N-(L-Arginino)succinate	C10H18N4O6	289.116	-1.24827	2.80818e-05	-2.45369	8.7679e-06	C03406
N-Formimino-L-glutamate	C6H10N2O4	173.057	-1.16792	1.34738e-05	-1.26211	3.84177e-06	C00439
Shikimate	C7H10O5	173.045	-1.16491	1.03137e-05	-2.15473	2.6503e-06	C00493
5,10-Methenyltetrahydrofolate	C20H22N7O6	455.156	-1.13944	2.09111e-05	-1.09538	4.11484e-06	C00445
5-Carboxyamino-1-(5-phospho-D-ribosyl)imidazole	C9H14N3O9P	338.038	-1.06	1.10969e-06	-1.2823	4.47537e-07	C15667
6-Deoxy-L-galactose	C6H12O5	163.061	-1.01849	1.30522e-05	-1.97924	1.06913e-06	C01019
2,3,4,5-Tetrahydrodipicolinate	C7H9NO4	170.046	-0.992141	1.22451e-06	-1.67547	2.0951e-09	C03972
D-Ribose	C5H10O5	149.046	-0.98795	1.9076e-05	-0.988056	9.73659e-07	C00121
3-Carbamoyl-2-phenylpropionaldehyde	C10H11NO3	192.066	-0.97487	6.51447e-05	-1.0226	5.14212e-06	C16587
5-Aminolevulinate	C5H9NO3	130.051	-0.914309	4.54912e-05	-0.564711	0.000144428	C00430
Pantetheine	C11H22N2O4S	277.123	-0.851915	0.000170367	-1.64434	1.22246e-05	C00831
D-Gluconic acid	C6H12O7	195.051	-0.849556	2.71438e-07	-0.825421	8.1149e-08	C00257
O-Phospho-L-serine	C3H8NO6P	184.001	-0.848415	2.01027e-05	-1.62304	3.0614e-07	C01005
N-Acetyl-L-glutamate 5-semialdehyde	C7H11NO4	172.061	-0.773325	2.71438e-07	-2.11581	1.89896e-08	C01250
O-Succinyl-L-homoserine	C8H13NO6	218.067	-0.763851	0.000745371	-1.50525	5.70908e-05	C01118
Glycolate	C2H4O3	75.0089	-0.716656	0.00053551	-0.675376	0.000291896	C00160
Guanosine	C10H13N5O5	282.084	-0.697323	0.000388497	-1.51279	3.2185e-05	C00387
4-Methyl-2-oxopentanoate	C6H10O3	129.055	-0.682541	2.09969e-05	-0.732647	5.07392e-06	C00233
3-Dehydroquinate	C7H10O6	189.041	-0.645931	0.000486794	-0.73958	0.000105667	C00944
5-Carboxy-2-oxohept-3-enedioate	C8H8O7	215.02	-0.64566	0.000167907	-0.572557	5.11462e-05	C04052
2-Methyl-4-amino-5-hydroxymethylpyrimidine diphosphate	C6H11N3O7P2	298	-0.636099	0.00211428	-1.27154	7.83879e-05	C04752
3-Deoxy-D-manno-octulosonate	C8H14O8	237.061	-0.614075	7.77575e-06	-0.64638	1.37286e-06	C01187
Nicotinamide	C6H6N2O	121.041	-0.598232	2.32611e-05	-0.62688	6.96776e-06	C00153
2-Propyn-1-ol	C3H4O	55.0189	-0.593049	0.00345523	-0.570782	0.0014102	C05986
Riboflavin	C17H20N4O6	375.13	-0.546156	9.77916e-05	-0.715408	7.89264e-06	C00255
4-Phospho-L-aspartate	C4H8NO7P	211.997	-0.533691	0.000449188	-0.557695	0.000134126	C03082
4-Amino-2-methyl-5-phosphomethylpyrimidine	C6H10N3O4P	218.033	-0.527364	0.00187333	-1.5286	3.51035e-05	C04556
D-Glucose	C6H12O6	179.056	-0.504061	1.85979e-06	-1.15017	2.0951e-09	C00031
5-L-Glutamyl-taurine	C7H14N2O6S	253.051	0.501875	1.42294e-05	1.18661	2.0951e-09	C05844
Citrate	C6H8O7	191.02	0.550648	0.00119818	1.02763	0.000102631	C00158
Tetrahydrocortisone	C21H32O5	363.217	0.588102	0.00011457	0.597294	6.01009e-06	C05470
D-Fructose 6-phosphate	C6H13O9P	259.023	0.849652	0.000212773	1.17395	4.70501e-05	C00085
UDP-glucose	C15H24N2O17P2	565.048	1.20298	0.00736673	1.03614	3.99217e-05	C00029
sn-Glycerol 3-phosphate	C3H9O6P	171.006	1.43959	2.35687e-07	0.522832	0.000139881	C00093
L-Tryptophan	C11H12N2O2	203.082	2.17643	0.000387962	3.32432	2.28597e-05	C00078
a Metabolite name and ID according to the KEGG database.
b Log2 Fold change (FC) of metabolite level, comparing nodules induced by the mutant strain with wild-type nodules.
c q-value calculated according to Storey et al. 2003 (Storey, J.D.; Tibshirani, R. Statistical significance for genomewide studies. PNAS 2003, 100, 9440–9445).

## Sheet: Table S5
Table S5. List of 438 B. diazoefficiens genes that are differentially expressed in nodules infected by the nifH mutant strain H1 as determined by microarray analysis. Nodules infected with the B. diazoefficiens wild-type strain were used as baseline.
ORF No	Log2( nifH Nod vs. wt Nod)	Descriptions	Gene Name
bll0148	2.23327	MFS permease
bll0195	1.67491	ABC transporter permease protein
bll0197	1.90149	ABC transporter permease protein
bll0199	1.0895	probable nitrile hydratase regulator
bll0235	1.14731	hypothetical protein
bll0236	1.36233	cysteine synthasecystathionine betasynthase family protein
bll0244	1.00144	probable homoserine Osuccinyltransferase (EC 2.3.1.46)
bll0339	-1.72738	4hydroxyphenylpyruvate dioxygenase (EC 1.13.11.27)
bll0449	1.15056	dihydrolipoamide dehydrogenase	lpdA
bll0451	1.42707	dihydrolipoamide Ssuccinyltransferase (EC 2.3.1.61)	sucB
bll0453	1.42438	succinylCoA synthetase alpha chain	sucD
bll0454	1.3989	hypothetical protein
bll0455	1.75403	succinylCoA synthetase beta chain	sucC
bll0456	1.35896	malate dehydrogenase	mdh
bll0557	-1.08009	putative cytochrome P450
bll0707	1.10434	50S ribosomal protein L20	rplT
bll0729	-1.25154	small heat shock protein	hspH
bll0805	-1.18771	hypothetical protein
bll0856	1.12102	unknown protein
bll0889	1.93055	putative transport protein
bll0902	1.60549	putative trehalose synthase protein
bll0913	-1.52284	hypothetical protein
bll0956	1.80735	hypothetical protein
bll0957	2.09997	hypothetical protein
bll0977	1.22404	hypothetical protein
bll1044	1.19849	glutamyltRNA(Gln) amidotransferase
bll1070	-1.68038	probable dioxygenase (EC 1.14..)
bll1076	-1.45403	hypothetical protein
bll1145	-1.152	hypothetical protein
bll1193	1.65627	integral inner membrane metabolite transport protein	mtbA
bll1204	1.04963	outermembrane immunogenic protein precursor
bll1209	2.02715	ABC transporter ATPbinding protein
bll1210	2.97746	ABC transporter permease protein
bll1211	1.78618	ABC transporter permease protein
bll1212	3.58736	ABC transporter substratebinding protein
bll1305	1.33285	unknown protein
bll1418	-1.699	methionine synthase	metH
bll1419	-2.38836	5,10methylenetetrahydrofolate reductase	metF
bll1447	1.66403	deadbox ATPdependent RNA helicase	rhlE
bll1476	-1.32916	sulfate adenylate transferase subunit 2	cysD
bll1718	-1.96016	C4dicarboxylate transport protein	dctA
bll1917	-1.25498	unknown protein
bll1943	1.31208	hypothetical protein
bll2002	1.47975	putative transposase
bll2304	-1.26188	probable ABC transporter, substrate binding protein
bll2362	1.34369	succinoglycan biosynthesis transport protein
bll2363	1.48954	unknown protein
bll2380	1.00432	probable glycosyl transferase
bll2431	-1.12658	hypothetical protein
bll2518	1.51652	hypothetical protein
bll2619	-1.2109	mediumchainfattyacidCoA ligase (EC 6.2.1.)	alkK
bll2699	1.07998	unknown protein
bll2708	1.88675	hypothetical protein
bll2735	1.10568	flavocytochrome C flavoprotein subunit
bll2800	1.2916	probable bifunctional serinethreonine kinase and phosphatase
bll2801	4.19377	probable potential formate transporter
bll2855	-2.08314	ornithine aminotransferase (EC 2.6.1.13)	rocD
bll2867	1.30918	ABC transporter permease protein
bll2868	1.9953	ABC transporter substratebinding protein
bll2941	-1.06492	hypothetical protein
bll3006	1.04824	hypothetical protein
bll3046	1.60312	hypothetical protein
bll3069	-1.2969	hypothetical protein
bll3150	-1.09542	putative Oxalate:formate antiporter
bll3242	1.47768	ABC transporter substratebinding protein
bll3313	1.34993	monooxygenase
bll3318	1.24306	ABC transporter ATPbinding protein
bll3346	1.54942	putative amidase
bll3347	2.2461	unknown protein
bll3387	-1.23107	unknown protein
bll3442	1.95308	putative senescence marker protein30 (SMP30) (Regucalcin) (RC)
bll3579	-1.13289	unknown protein
bll3717	-1.5951	lipoic Acid Synthetase	lipA
bll3752	-1.0862	molybdenum cofactor biosynthesis protein A	moaA
bll3763	2.66107	unknown protein
bll3784	-1.2863	cytochrome C oxidase	coxN
bll3785	-1.47794	cytochrome C oxidase	coxM
bll3856	-1.0145	probable mediumchainfattyacidCoA ligase (EC 6.2.1.)
bll3937	-1.11092	hypothetical protein
bll3998	1.43563	probable succinatesemialdehyde dehydrogenase [NADP+] (EC 1.2.1.16)
bll4057	1.5064	probable substratebinding protein
bll4166	-1.1488	unknown protein
bll4239	1.10367	hypothetical protein
bll4336	1.16414	hypothetical protein
bll4348	1.25399	ATPdependent RNA helicase	rhlE
bll4444	1.12895	hypothetical protein
bll4482	-1.02327	putative Alcohol dehydrogenase cytochrome C subunit precursor
bll4545	-1.04394	unknown protein
bll4570	4.80012	probable sulfite reductase [NADPH] flavoprotein alphacomponent (EC 1.8.1.2)
bll4571	4.98641	putative ferredoxinnitrite reductase (EC 1.7.7.1)
bll4594	1.18396	delta 9 acyllipid fatty acid desaturase
bll4707	-1.27928	hypothetical protein
bll4718	-2.25154	unknown protein
bll4798	-1.0499	putative glutaminase
bll4867	1.08202	putative outermembrane immunogenic protein precursor
bll4951	-1.1488	putative stomatinlike protein
bll4983	1.91724	hypothetical protein
bll4985	1.33685	hypothetical protein
bll5055	1.14143	putative GMCoxidoreductase
bll5056	1.50894	probable substratebinding protein
bll5076	-1.16165	hypothetical protein
bll5139	1.5435	probable transglycosylase
bll5143	2.1157	hypothetical protein
bll5219	-1.63039	small heat shock protein	hspD
bll5320	-1.191	unknown protein
bll5338	-1.3474	probable oxidoreductase
bll5375	1.01935	50S ribosomal protein L17	rplQ
bll5377	1.06626	30S ribosomal protein S11	rpsK
bll5390	1.49108	50S ribosomal protein L14	rplN
bll5399	1.04264	50S ribosomal protein L4	rplD
bll5403	1.16543	translation elongation factor G	fusA
bll5404	1.123	30S ribosomal protein S7	rpsG
bll5405	1.13619	30S ribosomal protein S12	rpsL
bll5408	1.10367	hypothetical protein
bll5409	1.91227	DNAdirected RNA polymerase beta chain	rpoC
bll5410	1.47975	DNAdirected RNA polymerase beta chain	rpoB
bll5500	1.73552	hypothetical protein
bll5501	1.71501	hypothetical protein
bll5529	2.32596	hypothetical metabolite transport protein
bll5579	1.03844	hypothetical protein
bll5589	1.60739	hypothetical protein
bll5596	1.54399	ABC transporter substratebinding protein
bll5655	2.11703	alcohol dehydrogenase
bll5661	-1.02034	hypothetical protein
bll5679	1.46258	hypothetical protein
bll5734	1.0072	ABC transporter nitratebinding protein	nrtA
bll5736	5.79546	putative thiosulfate sulfurtransferase precursor (EC 2.8.1.1)
bll5737	3.04824	putative acylCoA dehydrogenase
bll5738	6.84423	unknown protein
bll5782	-2.02915	ABC transporter sugarbinding protein
bll5813	1.07245	flagellar basalbody rod protein	flgC
bll5859	-1.37333	unknown protein
bll5875	-1.01742	unknown protein
bll6075	1.18587	hypothetical protein
bll6098	2.46702	unknown protein
bll6143	1.05797	transcriptional regulatory protein TetR family
bll6154	4.86443	unknown protein
bll6159	1.00144	putative hydroxydechloroatrazine ethylaminohydrolase (EC 3.5.99.3)
bll6183	-3.51293	hypothetical protein
bll6220	-1.97143	putative alcohol dehydrogenase precursor
bll6221	-1.01742	Rieske ironsulfur protein
bll6313	-2.08314	hypothetical protein
bll6363	1.47975	putative acylCoA dehydrogenase (EC 1.3.99.3)
bll6381	-1.04692	unknown protein
bll6449	-2.02915	hypothetical protein
bll6469	-1.33279	malic enzyme
bll6513	3.17728	hypothetical protein
bll6577	1.02928	hypothetical protein
bll6595	1.17377	UDP3o(3hydroxymyristoyl) Nacetylglucosamine deacetylase	lpxC
bll6713	2.7	probable ABC transporter permease protein
bll6714	1.02148	probable ABC transporter substratebinding protein
bll6838	2.34426	probable CbbYCbbZGpHYieH family hydrolase	cbbY
bll6890	1.26903	unknown protein
bll6896	1.54745	ABC transporter ATPbinding protein
bll6897	2.45022	ABC transporter ATPbinding protein
bll6898	2.26333	ABC transporter permease protein
bll6899	1.96458	ABC transporter substratebinding protein
bll6900	1.52206	hypothetical protein
bll7011	-1.21424	ABC transporter aliphaticsulfonatebinding protein
bll7176	1.60834	hypothetical protein
bll7178	1.55041	hypothetical protein
bll7179	1.30217	putative Nmethylhydantoinase B
bll7180	1.30918	hydantoin utilization protein
bll7225	1.10769	unknown protein
bll7229	2.31092	hypothetical protein
bll7353	1.74588	hypothetical protein
bll7511	1.11437	unknown protein
bll7538	2.68706	hypothetical protein
bll7580	1.99458	unknown protein
bll7626	1.02361	hypothetical protein
bll7635	1.32539	unknown protein
bll7689	-1.05589	putative monooxygenase protein
bll7749	-1.43051	hypothetical protein
bll7750	-1.49005	hypothetical protein
bll7770	1.10434	ABC transporter permease protein
bll7804	-1.33643	3hydroxyacylCoA dehydrogenase type II
bll7864	-1.25154	putative longchainfattyacidCoA ligase (EC 6.2.1.3)
bll7924	1.22589	unknown protein
bll7927	-1.49005	hypothetical protein
bll7928	-1.00868	putative fattyacidCoA ligase (EC 6.2.1.3)
bll7981	1.4049	putative dehydrogenase
bll7982	1.22712	hypothetical protein
bll8025	2.76638	hypothetical protein
bll8127	-1.13606	hypothetical protein
blr0103	-1.03505	probable oxidoreductase
blr0149	2.15056	cytochrome O ubiquinol oxidase subunit II	cyoA
blr0150	2.46728	cytochrome O ubiquinol oxidase subunit I	cyoB
blr0151	2.82985	cytochrome O ubiquinol oxidase subunit III	cyoC
blr0152	2.11703	cytochrome O ubiquinol oxidase subunit IV	cyoD
blr0153	2.02006	probable surfeit locus protein 1
blr0171	1.21661	unknown protein
blr0238	2.09862	oxidoreductase
blr0276	1.56413	hypothetical protein
blr0279	1.21847	twocomponent hybrid sensor and regulator
blr0308	-1.03505	ABC transporter peptidebinding protein
blr0336	-1.82623	carbon monoxide dehydrogenase large chain
blr0337	-1.40736	putative carbon monoxide dehydrogenase medium chain (EC 1.2.99.2)
blr0365	2.01578	30S ribosomal protein S21	rps21
blr0376	-1.04097	protease II	ptrB
blr0483	1.01792	16S rRNA processing protein	rimM
blr0540	1.45786	GTPbinding tyrosin phosphorylated protein	typA
blr0571	-1.32193	hypothetical protein
blr0606	-1.94342	nitrogen regulatory protein PII	glnK
blr0612	1.419	nitrogen regulatory protein PII	glnK
blr0613	1.54201	ammonium transporter	amtB
blr0675	-2.06492	heatinducible transcription repressor	hrcA
blr0747	-1.47393	carboxyl transferase component of acetylCoA carboxylase	accD
blr0804	1.0552	probable sugar kinase
blr0840	-1.38082	putative aldehyde dehydrogenase subunit III
blr0855	1.91877	hypothetical protein
blr0964	-1.00289	probable flavinbinding family monooxygenase
blr0971	3.10652	ABC transporter ATPbinding protein
blr0972	1.93584	amidase
blr0973	1.2857	amidase
blr0984	-1.3474	transcriptional regulatory protein AraC family
blr1036	1.48182	ABC transporter substratebinding protein
blr1052	-1.12343	putative ABC transporter binding protein
blr1077	-1.55639	acetylCoA synthetase (EC 6.2.1.1)
blr1080	-2.26534	hypothetical protein
blr1081	-1.93788	probable benzoylCoA oxygenase component
blr1174	-1.00578	putative cytochrome C oxidase assembly protein	coxG
blr1261	-1.1078	unknown protein
blr1289	1.73031	hypothetical protein
blr1301	1.34823	immunogenic protein precursor
blr1308	1.31557	hypothetical protein
blr1311	1.34937	outer membrane protein
blr1327	1.1117	hypothetical protein
blr1353	1.75232	ABC transporter peptidebinding protein
blr1354	1.14991	peptide ABC transporter permease protein
blr1356	1.32135	peptide ABC transporter ATPbinding protein
blr1408	1.0072	hypothetical protein
blr1429	-1.13924	unknown protein
blr1448	3.04667	ABC transporter substratebinding protein
blr1449	3.09525	ABC transporter permease protein
blr1450	2.37907	ABC transporter permease protein
blr1451	2.28777	ABC transporter ATPbinding protein
blr1452	1.62106	ABC transporter ATPbinding protein
blr1455	1.09828	urease beta subunit	ureB
blr1457	1.0165	urease alpha subunit	ureC
blr1477	-1.04394	probable trifunctional enzyme subunit
blr1515	1.12829	RND multidrug efflux membrane permease	acrA
blr1516	1.66585	RND multidrug efflux transporter	acrB
blr1629	-1.1016	multidrug resistance protein
blr1768	1.01436	unknown protein
blr1769	-3.30757	dinitrogenase reductase protein	nifH
blr1770	-4.48681	molybdenum processing protein	nifQ
blr1771	-3.93457	nitrogenase stabilizingprotective protein	nifW
blr1773	-1.17462	electron transfer flavoprotein alpha chain	fixB
blr1888	2.70863	unknown protein
blr1901	1.0697	hypothetical protein
blr2149	1.04544	hypothetical protein
blr2170	-1.78588	probable ABC transporter substratebinding protein
blr2194	1.05311	chemotaxis twocomponent response regulator	cheY
blr2359	1.07656	hypothetical protein
blr2405	1.17121	Peptidylprolyl isomerase (EC 5.2.1.8)	fbp
blr2423	1.06833	cation efflux system protein
blr2450	-1.17788	protease heat shock protein	htpx
blr2455	1.8512	isocitrate lyase (EC 4.1.3.1)
blr2458	1.52105	hypothetical protein
blr2470	2.46884	hypothetical protein
blr2506	1.08474	putative chemotaxis protein
blr2535	1.85758	glycyltRNA synthetase alpha subunit	glyQ
blr2576	1.23634	NcarbamylDamino acid amidohydrolase (EC 3.5..)
blr2581	5.0387	putative Dfructose1,6bisphosphatase protein	cbbF
blr2582	1.63877	putative phosphoribulokinase protein	cbbP
blr2583	3.8268	transketolase	cbbT
blr2584	2.12035	putative fructose1,6bisphosphate aldolase protein	cbbA
blr2585	3.35755	ribulose 1,5bisphosphate carboxylaseoxygenase large subunit	cbbL
blr2586	2.69599	ribulose 1,5bisphosphate carboxylaseoxygenase small subunit	cbbS
blr2587	2.16157	probable CbbX protein	cbbX
blr2588	3.07741	ribulosephosphate 3epimerase
blr2609	1.94035	oxidoreductase
blr2630	2.5208	phosphoglycerate mutase	gpmB
blr2725	2.774	hypothetical protein
blr2726	2.83046	hypothetical protein
blr2746	1.09356	transcriptional regulatory protein LuxR family
blr2754	2.58976	hypothetical protein
blr2803	4.21568	ABC transporter nitratebinding protein	nrtA
blr2804	3.60763	nitrate ABC transporter permease protein	nrtB
blr2805	3.87184	nitrate ABC transporter ATPbinding protein	nrtC
blr2806	3.9279	nitrite extrusion protein
blr2807	2.45549	probable bacterial hemoglobin
blr2808	3.00594	putative nitrite reductase
blr2809	2.61447	nitrate reductase large subunit	nasA
blr2811	1.15898	hypothetical protein
blr2812	2.22928	hypothetical zinctype alcohol dehydrogenase protein
blr2885	-1.12973	probable polybetahydroxybutyrate polymerase (EC 2.3.1.)
blr2886	-1.52284	hypothetical protein
blr2887	1.9982	hypothetical protein
blr2891	-1.2723	putative phenylacetic acid degradation protein
blr2893	-1.73697	putative phenylacetic acid degradation protein	paaC
blr2895	-1.73216	putative ferredoxin reductase electron transfer component protein	paaE
blr2897	-1.47393	Phenylacetatecoenzyme A ligase (EC 6.2.1.30)	paaK
blr2925	2.20006	amino acid ABC transporter ATPbinding protein
blr2934	2.81106	probable cation efflux protein	ragC
blr2977	2.49442	hypothetical protein
blr2978	1.01364	hypothetical protein
blr3179	-1.47393	probable alanine dehydrogenase oxidoreductase protein
blr3276	1.28511	nicotinatenucleotidedimethylbenzimidazole phosphoribosyl transferase	cobU
blr3311	1.01935	ABC transporter ATPbinding protein
blr3327	2.70863	probable Nmethylhydantoinase B (EC 3.5.2.14)
blr3350	1.05172	probable carbon monoxide dehydrogenase large chain (EC 1.2.99.2)	cutL
blr3353	1.62667	ABC transporter substratebinding protein
blr3354	2.66084	ABC transporter permease protein
blr3356	2.3846	ABC transporter ATPbinding protein
blr3389	-2.07704	probable ABC transporter substratebinding protein
blr3390	-1.92139	probable ABC transporter permease protein
blr3391	-2.09542	probable ABC transporter permease protein
blr3392	-1.82623	dehydrogenase
blr3394	-1.80088	transcriptional regulatory protein LacI family
blr3396	1.75531	major facilitator superfamily transporter
blr3441	1.71589	transcriptional regulatory protein LysR family
blr3630	3.29543	ABC transporter substratebinding protein
blr3631	1.37072	ABC transporter ATPbinding protein
blr3634	3.20054	hypothetical protein
blr3642	1.16479	Sadenosylmethionine:2demethylmenaquinone methyltransferase	menG
blr3675	-2.21759	putative alcohol dehydrogenase (EC 1.1.1.1)
blr3685	-1.22095	transcriptional regulatory protein Fis family
blr3719	-4.34227	hypothetical protein
blr3720	-3.1078	probable pyruvate dehydrogenase
blr3721	-2.699	dihydrolipoamide Sacetyltransferase (EC 2.3.1.12)	aceF
blr3722	-4.94342	dihydrolipoamide dehydrogenase (EC 1.8.1.4)	lpd
blr3723	-2.86775	C4dicarboxylate transport protein	dctA
blr3724	-3.12029	acetylCoA acetyltransferase	phbA
blr3725	-2.35107	acetoacetyl CoA reductase	phbB
blr3828	1.62293	ABC transporter ATPbinding protein
blr3924	-1.32916	acetyl CoA synthase
blr3932	2.3083	probable N,Ndimethylformamidase large subunit (EC 3.5.1.56)
blr3973	-1.1047	probable NADPdependent oxidoreductase
blr4055	1.59455	hypothetical protein
blr4158	1.42868	probable tryptophan 2,3dioxygenase (EC 1.13.11.11)
blr4169	1.38571	glutamine synthetase II	glnII
blr4241	2.74416	hypothetical protein
blr4363	1.56267	hypothetical protein
blr4364	1.45207	putative haloacid dehalogenase
blr4411	1.13093	hypothetical protein
blr4417	1.02006	unknown protein
blr4486	1.54251	nitrogen regulation protein	nifR
blr4487	1.82619	twocomponent sensor histidine kinase	ntrB
blr4488	2.27352	twocomponent response regulator	ntrC
blr4624	3.25066	hypothetical protein
blr4700	1.51501	putative outermembrane immunogenic protein precursor
blr4764	3.92505	unknown protein
blr4829	2.84559	unknown protein
blr4948	1.78576	nitrogen regulatory protein PII	glnB
blr4977	-2.1016	putative monooxygenase (EC 1.14.13.)
blr5116	-1.53952	Nrd protein	nrd
blr5140	1.41034	hypothetical protein
blr5168	1.53655	hypothetical protein
blr5220	-1.78588	small heat shock protein	hspE
blr5233	-1.96578	small heat shock protein	hspB
blr5234	-1.61264	small heat shock protein	hspC
blr5292	1.8746	unknown protein
blr5374	1.16092	hypothetical protein
blr5427	3.08644	hypothetical transketolase family protein
blr5553	1.99023	hypothetical protein
blr5573	2.2135	ABC transporter ATPbinding protein
blr5574	2.51096	ABC transporter substratebinding protein
blr5575	2.7031	ABC transporter permease protein
blr5576	3.02077	ABC transporter permease protein
blr5577	3.12846	hydantoin Racemase
blr5602	1.04474	hippurate hydrolase
blr5612	2.29013	hypothetical protein
blr5613	2.26873	hypothetical protein
blr5614	1.52356	hypothetical protein
blr5669	1.00576	gammacarboxymuconolactone decarboxylase
blr5739	2.42841	transcriptional regulatory protein TetR family
blr5752	-1.30757	glycine cleavage system component H	gcvH
blr5860	-1.62149	transcriptional regulatory protein GntR family
blr5962	-1.27579	ABC transporter ATPbinding protein
blr6074	1.42062	hypothetical protein
blr6127	-1.50635	hypothetical protein
blr6138	1.07382	hypothetical protein
blr6148	3.63807	ABC transporter substratebinding protein
blr6149	3.91456	ABC transporter permease protein
blr6150	1.24853	ABC transporter permease protein
blr6151	2.73725	hypothetical isochorismatase family protein
blr6185	-1.51046	twocomponent response regulator
blr6246	1.36681	ABC transporter substratebinding protein
blr6247	1.01863	ABC transporter permease protein
blr6249	1.12565	putative aminohydrolase
blr6331	-1.02034	2oxoisovalerate dehydrogenase alpha subunit	bkdA1
blr6465	-1.34373	putative steroid monooxygenase (EC 1.14.99.)
blr6482	-1.00868	putative signal peptide protein
blr6922	1.72115	unknown protein
blr7006	2.56267	probable carboxypeptidase G2
blr7064	-1.60384	probable ABC transporter substratebinding protein
blr7088	1.123	unknown protein
blr7089	3.27694	respiratory nitrite reductase	nirK
blr7167	3.2299	unknown protein
blr7242	-1.11716	putative cytochrome P450
blr7270	-1.17137	probable acylCoA dehydrogenase (EC 1.3.99.3)
blr7325	1.7031	hypothetical protein
blr7331	-1.2969	hypothetical protein
blr7345	1.03773	unknown protein
blr7359	1.83066	transcriptional regulatory protein ArsR family
blr7360	1.85	hypothetical protein
blr7361	1.83431	hypothetical protein
blr7537	1.24306	probable ATPbinding protein
blr7556	4.39506	nonheme haloperoxidase
blr7579	1.0552	hypothetical protein
blr7615	3.5509	dihydropyrimidinase	dht
blr7740	-2.00578	small heat shock protein
blr7824	-1.30045	ABC transporter ATPbinding protein
blr7873	1.69287	ABC transporter ATPbinding protein
blr8117	1.16092	ABC transporter substratebinding protein
blr8121	1.04334	putative cycloisomerase (EC 5.5.1.)
blr8159	2.14078	hypothetical protein
blr8160	2.01221	ABC transporter molybdenumbinding protein	modA
blr8161	1.83147	molybdenum ABC transporter permease protein	modB
blr8162	1.86275	molybdenum ABC transporter ATPbinding protein	modC
bsl0169	1.98222	unknown protein
bsl0170	1.02574	hypothetical protein
bsl0728	-1.191	hypothetical protein
bsl2014	-1.53533	unknown protein
bsl2560	1.20789	hypothetical protein
bsl4152	-1.75147	unknown protein
bsl4167	-2.00578	putative glutamine synthetase translation inhibitor
bsl4569	-1.55639	unknown protein
bsl4623	-1.37707	unknown protein
bsl4628	-1.60384	unknown protein
bsl5382	1.51248	50S ribosomal protein L30	rpmD
bsl5891	-1.84166	hypothetical protein
bsl6780	2.91265	unknown protein
bsl7442	-1.09542	hypothetical protein
bsl7915	1.14666	hypothetical protein
bsr0959	1.58448	hypothetical protein
bsr1232	-2.52284	hypothetical protein
bsr2152	1.0229	unknown protein
bsr2892	-1.77103	phenylacetic acid degradation protein	paaB
bsr3154	1.38515	cold shock protein	cspA
bsr3155	2.58568	unknown protein
bsr4175	1.10165	hypothetical protein
bsr4406	1.44731	unknown protein
bsr4471	1.05102	unknown protein
bsr5590	2.3553	hypothetical protein
bsr6735	-1.21424	putative pyrroloquinoline quinone synthesis protein A	pqqA
bsr7729	1.1865	unknown protein

## Sheet: Table S6
Table S6. List of 754 B. diazoefficiens genes that are differentially expressed in nodules infected by the nifA mutant strain A9 as determined by microarray analysis. Nodules infected with the B. diazoefficiens wild-type strain were used as baseline.
ORF No	Log2( nifA Nod vs. Wt Nod)	Descriptions	Gene Name
bll0051	1.10299	replication protein A	repA
bll0167	-1.1016	unknown protein
bll0176	1.25217	unknown protein
bll0196	1.22157	ABC transporter substrate-binding protein
bll0198	1.13553	amidase (EC 3.5.1.4)
bll0202	-2.74662	unknown protein
bll0221	-2.51457	hypothetical protein
bll0322	1.03351	probable trehalose-6-phosphate synthase	otsA
bll0331	1.13685	two-component response regulator
bll0332	2.21568	unknown protein
bll0333	2.8476	probable alcohol dehydrogenase precursor
bll0377	1.08474	hypothetical protein
bll0381	1.09221	ABC transporter substrate-binding protein
bll0390	-2.53116	protein-glutamate O-methyltransferase (EC 2.1.1.80)	cheR1
bll0391	-2.07704	two-component response regulator
bll0392	-1.95456	transducer coupling protein	cheW
bll0457	-2.49005	hypothetical protein
bll0554	-2.152	short-chain dehydrogenase
bll0555	-1.60823	hypothetical protein
bll0563	1.53854	hypothetical protein
bll0688	-1.05289	hypothetical protein
bll0693	3.15397	unknown protein
bll0813	-1.18442	hypothetical protein
bll0818	-1.0619	unknown protein
bll0875	-2.33643	recombinase
bll0891	-1.82113	hypothetical protein
bll0892	-1.60384	unknown protein
bll0894	-1.18115	putative cytochrome P450
bll0916	-1.25843	bifunctional uridylyltransferase-uridylyl-removing enzyme
bll0932	1.22219	multidrug resistance protein A
bll0933	1.7476	transcriptional regulatory protein MarR family
bll0966	-1.0145	two-component hybrid sensor and regulator
bll1019	2.0545	hypothetical protein
bll1029	-1.14561	two-component response regulator
bll1070	-2.73697	probable dioxygenase (EC 1.14.-.-)
bll1097	-1.13924	hypothetical protein
bll1126	1.123	hypothetical protein
bll1142	-1.2863	hypothetical protein
bll1145	-1.39973	hypothetical protein
bll1193	1.96828	integral inner membrane metabolite transport protein	mtbA
bll1200	-1.60823	5-aminolevulinic acid synthase (EC 2.3.1.37)	hemA
bll1235	-1.30757	O-acetylhomoserine sulfhydrylase	cysD
bll1276	1.56218	malonate decarboxylase alpha subunit	mdcA
bll1299	-1.05889	hypothetical protein
bll1351	-1.38836	putative serine protease
bll1406	1.12565	hypothetical protein
bll1419	-1.60384	5,10-methylenetetrahydrofolate reductase	metF
bll1465	1.2302	hypothetical protein
bll1634	-4.94342	unknown protein
bll1636	-4.40202	unknown protein
bll1669	-1.84166	hypothetical protein
bll1687	-2.1078	hypothetical protein
bll1688	-1.38836	probable suppressor protein
bll1718	-4.5632	C4-dicarboxylate transport protein	dctA
bll1754	-4.84063	hypothetical protein
bll1762	-3.63846	unknown protein
bll1766	-2.61706	outer membrane protein
bll1767	-6.03978	hypothetical protein
bll1776	-4.23786	alkyl hydroperoxide reductase	ahpD
bll1777	-5.97483	alkyl hydroperoxide reductase	ahpC
bll1797	2.82518	hypothetical protein
bll1798	1.57773	hypothetical protein
bll1799	1.76043	hypothetical protein
bll1800	2.13947	RhcV protein	rhcV
bll1801	4.28021	hypothetical protein
bll1802	2.86908	unknown protein
bll1803	3.56803	hypothetical protein
bll1804	5.35755	unknown protein
bll1810	5.39985	hypothetical protein
bll1826	1.11303	putative transposase
bll1840	3.36317	unknown protein
bll1841	2.09288	hypothetical protein
bll1842	2.91686	RhcC2 protein	rhcC2
bll1843	1.94636	two-component response regulator	basR
bll1844	3.75061	unknown protein
bll1846	4.34696	unknown protein
bll1848	3.11819	unknown protein
bll1858	-5.22162	hypothetical protein
bll1864	-2.25843	citrate-proton symporter	citA
bll1872	-5.52616	hypothetical protein
bll1875	-3.9771	hypothetical protein
bll1877	4.41143	unknown protein
bll1897	-1.25843	unknown protein
bll1906	-5.02093	N-acetyltransferase NrgA homolog
bll1917	-1.35845	unknown protein
bll1929	-1.18771	unknown protein
bll1943	-2.4344	hypothetical protein
bll1944	-5.42353	hypothetical protein
bll1946	-2.1976	hypothetical protein
bll1948	-1.34373	unknown protein
bll1978	-3.01159	hypothetical protein
bll1979	-5.59423	hypothetical protein
bll1980	-4.77992	hypothetical protein
bll1981	-4.90833	hypothetical protein
bll2002	-2.2723	putative transposase
bll2003	-4.29903	unknown protein
bll2004	-4.85726	unknown protein
bll2009	-5.62238	hypothetical protein
bll2016	-2.59074	NolY protein	nolY
bll2040	-2.16488	unknown protein
bll2059	-4.75244	GroEL3 chaperonin	groEL3
bll2060	-4.86145	GroES3 chaperonin	groES3
bll2063	-6.16877	phenolhydroxylase homolog	nrgC
bll2067	-4.90833	nodulate formation efficiency C protein	nfeC
bll2085	-4.2849	hypothetical protein
bll2087	-1.99424	unknown protein
bll2104	-2.53952	unknown protein
bll2109	-1.64837	transcriptional regulatory protein Crp family
bll2125	-4.9568	probable dioxygenase
bll2141	-1.23107	unknown protein
bll2176	1.461	two-component hybrid sensor and regulator
bll2209	2.02609	copper tolerance protein	copC
bll2357	-1.56064	unknown protein
bll2365	-1.67577	unknown protein
bll2395	1.17377	hypothetical protein
bll2411	-1.24469	unknown protein
bll2431	-1.41504	hypothetical protein
bll2446	-1.00289	hypothetical protein
bll2460	-3.40507	hypothetical protein
bll2461	-2.53952	hypothetical protein
bll2509	-1.81097	adenine DNA methyltransferase	gst
bll2517	1.68347	putative acetate kinase (acetokinase) protein
bll2518	1.82985	hypothetical protein
bll2537	2.09424	hypothetical protein
bll2598	1.18523	two-component response regulator
bll2604	-2.78588	transcriptional regulatory protein MarR family
bll2613	-3.05889	hypothetical protein
bll2621	-1.41889	hypothetical protein
bll2692	1.23205	putative glycosyltransferase
bll2752	2.1167	probable glycosyl transferase
bll2853	-2.59946	probable adenylyl cyclase
bll2855	-1.05889	ornithine aminotransferase (EC 2.6.1.13)	rocD
bll2956	2.72966	gluconolactonase precursor
bll3007	-1.02621	penicillin tolerance protein	ispH2
bll3020	-1.32916	GMC type oxidoreductase
bll3022	-2.31473	low-affinity inorganic phosphate transporter
bll3117	1.0635	putative thymidine phosphorylase (EC 2.4.2.4)
bll3149	1.55729	putative Oxalate:formate antiporter
bll3177	-1.08314	probable arginine-lysine-ornithine decarboxylases
bll3181	1.14731	transcriptional regulatory protein TetR family
bll3194	-3.32193	unknown protein
bll3247	3.11053	dioxygenase
bll3282	1.1776	unknown protein
bll3363	-3.30757	unknown protein
bll3421	1.45101	unknown protein
bll3440	1.74157	hypothetical protein
bll3466	1.01578	transcriptional regulatory protein Crp family
bll3592	-1.02034	hypothetical protein
bll3593	-1.03209	hypothetical protein
bll3639	-2.53952	putative biotin carboxyl carrier protein of acetyl-CoA carboxylase
bll3717	-1.67577	lipoic Acid Synthetase	lipA
bll3759	-1.49818	hypothetical protein
bll3766	1.16221	similar to flavohemoprotein
bll3817	-1.30045	hypothetical protein
bll3902	-1.06492	AcrB-AcrD-AcrF family protein
bll3903	-1.5951	putative multidrug resistance protein
bll3937	-1.07704	hypothetical protein
bll4012	1.64893	organic hydroperoxide resistance protein
bll4130	-3.08314	transcriptional regulatory protein LysR family
bll4177	5.52325	hypothetical protein
bll4228	-1.22769	putative ethidium resistance protein
bll4278	1.0545	unknown protein
bll4293	3.30728	hypothetical protein
bll4367	1.9982	hypothetical protein
bll4390	-1.38836	hypothetical protein
bll4483	-1.13606	putative cytochrome C4
bll4503	-3.14561	unknown protein
bll4543	-1.486	ABC transporter ATP-binding protein
bll4544	-2.47393	ABC transporter substrate-binding protein
bll4545	-2.08314	unknown protein
bll4570	1.64801	probable sulfite reductase [NADPH] flavoprotein alpha-component (EC 1.8.1.2)
bll4571	2.20758	putative ferredoxin--nitrite reductase (EC 1.7.7.1)
bll4578	-1.41504	transcriptional regulatory protein MerR family
bll4639	1.64432	probable protease
bll4718	-2.08314	unknown protein
bll4765	-1.1488	unknown protein
bll4766	-2.662	hypothetical protein
bll4879	-2.7084	hypothetical protein
bll4880	-1.96016	hypothetical protein
bll4881	-2.36587	hypothetical protein
bll4882	-1.90509	unknown protein
bll4943	-1.67577	ATP-dependent Clp protease, ATP-binding subunit	clpX
bll4983	-1.59074	hypothetical protein
bll5010	-1.45008	putative resolvase
bll5018	-1.26534	hypothetical protein
bll5159	-1.03801	hypothetical protein
bll5184	-1.25154	putative cytochrome P460
bll5194	-1.82113	hypothetical protein
bll5205	1.56755	unknown protein
bll5290	-2.62593	hypothetical protein
bll5291	-2.02327	transcriptional regulatory protein ArsR family
bll5293	-1.46993	putative outer-membrane immunogenic protein precursor
bll5300	1.00072	probable minor curlin subunit precursor	csgA
bll5326	-2.23786	unknown protein
bll5343	-1.30401	hypothetical protein
bll5481	-1.08927	hypothetical protein
bll5503	1.41251	hypothetical protein
bll5655	1.7845	alcohol dehydrogenase
bll5676	-1.46196	two-component response regulator
bll5679	-1.40736	hypothetical protein
bll5694	-1.33643	hypothetical protein
bll5714	-1.0619	hypothetical protein
bll5726	-1.62593	putative transposase
bll5734	-1.43831	ABC transporter nitrate-binding protein	nrtA
bll5736	3.9542	putative thiosulfate sulfurtransferase precursor (EC 2.8.1.1)
bll5738	4.82477	unknown protein
bll5806	-2.07704	putative glutamyl-tRNA(Gln) amidotransferase subunit (EC 6.3.5.-)
bll5835	1.58688	hypothetical protein
bll5842	-1.51046	hypothetical protein
bll5846	-1.71312	hypothetical protein
bll5854	-2.17137	unknown protein
bll5859	-2.82623	unknown protein
bll5866	1.46624	hypothetical protein
bll5876	-1.662	hypothetical protein
bll5903	-1.67116	probable glycosyl transferase
bll5912	-1.61706	serine hydroxymethyltransferase	glyA
bll6137	-1.0862	quinone oxidoreductase	qor
bll6146	-2.53116	unknown protein
bll6154	3.12912	unknown protein
bll6221	1.146	Rieske iron-sulfur protein
bll6313	-2.64386	hypothetical protein
bll6346	-1.21759	hypothetical protein
bll6381	-4.33352	unknown protein
bll6414	-1.9771	transcriptional regulatory protein LuxR family
bll6422	1.09288	hypothetical protein
bll6424	1.80157	unknown protein
bll6427	1.99892	hypothetical protein
bll6428	1.71414	hypothetical protein
bll6450	1.12499	probable substrate-binding protein
bll6451	1.21226	probable alkanesulfonate monooxygenase (EC 1.1.-.-)
bll6452	1.39835	acyl-CoA dehydrogenase	acd
bll6453	1.18078	ABC transporter ATP-binding protein
bll6469	-1.56064	malic enzyme
bll6479	-2.45799	ABC transporter substrate-binding protein
bll6480	-1.84684	hypothetical protein
bll6481	-1.00289	ABC transporter substrate-binding protein
bll6529	1.16607	unknown protein
bll6552	4.46271	hypothetical protein
bll6633	-2.07097	unknown protein
bll6634	-1.68038	probable Phosphatidylethanolamine N-methyltransferase (EC 2.1.1.17)	pmtA
bll6635	-1.31473	probable glycosyl transferase
bll6662	-1.20423	ribitol 2-dehydrogenase	rdh
bll6680	-1.63039	bacterioferritin	bfr
bll6702	-1.6529	glutathione S-transferase
bll6714	-2.12658	probable ABC transporter substrate-binding protein
bll6778	1.55287	potassium-transporting ATPase B chain	kdpB
bll6891	-1.08314	unknown protein
bll6899	-1.2723	ABC transporter substrate-binding protein
bll6936	-1.84684	HupH protein	hupH
bll6939	-3.7084	HupD protein	hupD
bll6940	-5.36885	HupC protein	hupC
bll6941	-4.07339	uptake hydrogenase large subunit	hupL
bll6942	-6.61529	uptake hydrogenase precursor	hupA
bll6949	-1.99424	HupN protein	hupN
bll6950	-3.77004	putative pyrophosphorylase (EC 2.4.2.-)	modD
bll6954	-2.4344	hypothetical protein
bll6962	-1.64837	transcriptional regulatory protein AraC family
bll7019	1.47871	AcrB-AcrD-AcrF family protein
bll7022	1.87539	unknown protein
bll7024	1.74889	transcriptional regulatory protein TetR family
bll7025	3.21832	hypothetical protein
bll7179	-1.35107	putative N-methylhydantoinase B
bll7180	-1.63039	hydantoin utilization protein
bll7236	-1.15843	putative threonine synthase (EC 4.2.3.1)
bll7272	-2.08927	putative dihydrodipicolinate synthase
bll7279	1.72857	unknown protein
bll7306	3.08117	two-component response regulator
bll7307	1.57821	two-component response regulator
bll7308	1.49057	unknown protein
bll7310	2.8488	probable ArcA2 arginine deiminase
bll7311	3.05866	probable ArcD2 arginine-ornithine antiporter
bll7313	3.66903	RND efflux membrane fusion protein
bll7322	3.01167	hypothetical protein
bll7374	1.12829	DNA-binding stress response protein, Dps family
bll7414	1.0036	probable Elongation factor G
bll7425	-1.84166	hypothetical protein
bll7479	-1.38082	two-component response regulator
bll7487	1.65031	unknown protein
bll7555	-1.14242	transcriptional regulatory protein LysR family
bll7588	-2.92139	transcriptional regulatory protein AsnC family
bll7599	-1.03209	amino acid ABC transporter permease protein
bll7613	1.61777	hypothetical protein
bll7624	-1.53116	probable adenylate cyclase
bll7639	1.21288	putative alcohol dehydrogenase(EC 1.1.99.8)
bll7644	2.29602	hypothetical protein
bll7673	1.91991	hypothetical protein
bll7768	-1.2863	hypothetical protein
bll7769	-1.5649	ABC transporter substrate-binding protein
bll7770	-2.8997	ABC transporter permease protein
bll7771	-3.15843	ABC transporter ATP-binding protein
bll7792	1.16027	unknown protein
bll7849	-3.17137	putative glutathione S-transferase
bll7863	-2.11404	hypothetical protein
bll7921	-1.63039	ABC transporter substrate-binding protein
bll7938	-1.98279	hypothetical protein
bll7952	-1.70369	probable selenium-binding protein
bll7986	1.11036	hypothetical protein
bll7988	1.27679	probable ATP-binding protein
bll8020	-2.35845	putative ubiquinone-menaquinone biosynthesis methyltransferase
bll8036	-2.27928	unknown protein
bll8048	2.89782	unknown protein
bll8127	-2.9105	hypothetical protein
blr0123	2.59503	hypothetical protein
blr0222	-1.06794	glyoxalase II	gloB
blr0241	-3.48197	1-aminocyclopropane-1-carboxylate deaminase (EC 4.1.99.4)	acdS
blr0279	1.89647	two-component hybrid sensor and regulator
blr0354	-1	hypothetical protein
blr0376	-1.37707	protease II	ptrB
blr0400	-3.01159	unknown protein
blr0426	-1.53952	putative phosphonate monoester hydrolase
blr0512	-1.03801	succinate dehydrogenase cytochrome B-556 subunit	sdhC
blr0521	1.39067	hypothetical protein
blr0547	-1.17788	hypothetical protein
blr0614	1.0895	hypothetical protein
blr0675	-1.80591	heat-inducible transcription repressor	hrcA
blr0684	1.21971	hypothetical protein
blr0742	-1.18442	integration host factor beta subunit	ihfB
blr0840	1.48697	putative aldehyde dehydrogenase subunit III
blr0841	2.31354	aldehyde dehydrogenase
blr0851	-1.89432	hypothetical protein
blr0860	3.43696	hypothetical protein
blr0967	2.40871	ABC transporter substrate-binding protein
blr0972	1.62106	amidase
blr0997	-1.30401	AcrB-AcrD-AcrF family protein
blr1050	1.77821	branched chain amino acid transport system substrate binding protein
blr1077	-1.71786	acetyl-CoA synthetase (EC 6.2.1.1)
blr1080	-2.37333	hypothetical protein
blr1081	-1.79586	probable benzoyl-CoA oxygenase component
blr1091	-1.77596	ABC transporter phosphate-binding protein	pstS
blr1092	-1.8365	phosphate ABC transporter permease protein	pstC
blr1094	-1.4112	phosphate ABC transporter ATP-binding protein	pstB
blr1095	-1.51457	phosphate transport system regulatory protein	phoU
blr1096	-2	phosphate regulon, two-component response regulator	phoB
blr1103	-1.43051	hypothetical protein
blr1104	-1.03801	hypothetical protein
blr1115	1.63599	probable transcriptional regulator
blr1121	1.1157	sugar ABC transporter ATP-binding protein
blr1130	-1.31115	hypothetical protein
blr1170	-1.44222	cytochrome C oxidase subunit II	coxB
blr1224	-1.58208	phosphonate metabolism protein	phnJ
blr1261	-1.02915	unknown protein
blr1280	-1.14242	putative isopenicillin N epimerase
blr1399	-1.83136	homoserine O-acetyltransferase (EC 2.3.1.31)	metX
blr1424	-1.23107	ABC transporter substrate-binding protein
blr1429	-2.47393	unknown protein
blr1448	1.8508	ABC transporter substrate-binding protein
blr1469	1.7433	hypothetical protein
blr1554	-2.00578	hypothetical protein
blr1600	1.45891	nitrilotriacetate monooxygenase
blr1601	1.69555	ABC transporter substrate-binding protein
blr1602	1.18206	ABC transporter permease protein
blr1625	-2.30045	unknown protein
blr1626	-2.88897	ketopantoate hydroxymethyltransferase
blr1638	-5.4112	unknown protein
blr1649	5.34163	unknown protein
blr1650	4.8846	unknown protein
blr1656	4.80168	putative glycosyl hydrolase
blr1670	-1.28279	unknown protein
blr1671	-1.37707	hypothetical protein
blr1676	4.21723	hypothetical protein
blr1679	3.3978	similar to ABC transporter permease protein
blr1686	-5.98393	putative aminotransferase protein
blr1704	6.06221	hypothetical protein
blr1705	4.61706	unknown protein
blr1719	-4.30472	molybdenum transport system permease protein	modB
blr1720	-3.30757	uptake hydrogenase small subunit precursor homolog	hupS
blr1721	-4.2109	uptake hydrogenase large subunit homolog	hupL
blr1724	-4.32771	HupD protein homolog
blr1726	-6.99309	unknown protein
blr1727	-2.9885	HupH protein homolog	hupH
blr1728	-4.48036	HupK protein homolog	hupK
blr1743	-5.42353	nitrogenase molybdenum-iron protein alpha chain	nifD
blr1744	-5.19496	nitrogenase molybdenum-iron protein beta chain	nifK
blr1745	-6.03978	nitrogenase molybdenum-cofactor synthesis protein	nifE
blr1746	-5.62238	nitrogenase molybdenum-cofactor synthesis protein	nifN
blr1747	-4.59423	iron-molibdenum cofactor processing protein	nifX
blr1748	-6.29903	hypothetical protein
blr1752	3.21366	host-inducible protein A homolog
blr1755	-4.71028	R. etli iscN homolog
blr1756	-5.37482	nitrogenase metalloclusters biosynthesis protein	nifS
blr1759	-5.05409	FeMo cofactor biosynthesis protein	nifB
blr1761	-4.61529	iron-sulfur cofactor synthesis protein	nifZ
blr1763	-6.09789	unknown protein
blr1765	-4.29903	ferredoxin	fer2
blr1769	-5.29336	dinitrogenase reductase protein	nifH
blr1770	-5.1078	molybdenum processing protein	nifQ
blr1771	-5.72547	nitrogenase stabilizing-protective protein	nifW
blr1773	-5.03978	electron transfer flavoprotein alpha chain	fixB
blr1774	-5.16359	flavoprotein	fixC
blr1787	1.88206	unknown protein
blr1806	4.91025	unknown protein
blr1812	5.86022	nodulation protein	nolB
blr1813	5.74739	RhcJ protein	rhcJ
blr1814	5.02237	nodulation protein	nolU
blr1815	3.41684	nodulation protein	nolV
blr1816	4.41143	RhcN protein	rhcN
blr1817	5.1416	hypothetical protein
blr1818	3.8748	RhcQ protein	rhcQ
blr1819	4.46793	RhcR protein	rhcR
blr1821	1.81024	RhcT protein	rhcT
blr1822	1.50995	RhcU protein	rhcU
blr1850	-5.20025	unknown protein
blr1851	-4.71786	unknown protein
blr1852	-4.27928	similar to pantoate--beta-alanine ligase
blr1853	-6.00231	cytochrome P450 family protein
blr1867	-3.09542	hypothetical protein
blr1869	3.01096	unknown protein
blr1876	-3.01159	unknown protein
blr1879	-4.42973	hypothetical protein
blr1880	-4.9885	transcriptional regulatory protein LuxR family
blr1882	-1.77103	unknown protein
blr1883	-1.12658	RNA polymerase sigma-54 subunit	rpoN1
blr1889	-1.00868	ABC transporter substrate-binding protein
blr1901	-1.88897	hypothetical protein
blr1904	2.87046	hypothetical protein
blr1905	1.99711	unknown protein
blr1912	-3.05889	unknown protein
blr1933	1.52256	hypothetical protein
blr1945	-2.22432	unknown protein
blr1954	-6.70425	unknown protein
blr1964	-5.38082	putative sugar hydrolase
blr1971	-4.63666	putative peptidase
blr1992	-5.50635	unknown protein
blr1993	2.45733	probable polygalacturonase
blr1994	1.93546	probable pectinesterase
blr1995	2.76553	unknown protein
blr2006	-3.93677	unknown protein
blr2011	-4.87408	unknown protein
blr2031	-1.84166	NodJ protein	nodJ
blr2036	-4.28771	oxidoreductase	fixR
blr2037	-2.92139	nif-specific regulatory protein
blr2038	-4.57691	electron transfer flavoprotein beta chain	fixA
blr2039	-3.94564	unknown protein
blr2041	-4.20823	unknown protein
blr2042	-4.84063	hypothetical protein
blr2044	-2.08314	unknown protein
blr2068	-3.80591	5-methyltetrahydropteroyltriglutamate-homocysteine S-methyltransferase (EC 2_1_1_14)	metE
blr2069	-4.36885	unknown protein
blr2071	-4.85308	similar to inosamine-phosphate amidinotransferase
blr2106	-6.45482	L-ectoine synthase	ectC
blr2108	-4.59771	probable peptide synthetase
blr2113	-1.47794	hypothetical protein
blr2114	-2.1016	hypothetical protein
blr2119	-1.06492	probable cation transport protein
blr2131	-6.00231	probable oxygenase
blr2132	-6.73159	unknown protein
blr2133	-5.25981	hypothetical protein
blr2134	-5.12784	hypothetical protein
blr2135	-5.00231	hypothetical protein
blr2136	-5.39897	putative aminotransferase (EC 2.6.1.-)
blr2140	4.23573	hypothetical protein
blr2143	-4.87832	similar to cytochrome P450-family protein
blr2144	-4.50635	cytochrome P-450 BJ-1	cyp112
blr2145	-4.17919	cytochrome P-450 BJ-3	cyp114
blr2146	-3.80793	dehydrogenase
blr2147	-3.43909	cytochrome P-450 BJ-4	cyp117
blr2148	-3.1976	farnesyl diphosphate synthase
blr2149	-1.61264	hypothetical protein
blr2150	-2.699	hypothetical protein
blr2269	1.65947	ABC transporter sugar-binding protein
blr2272	1.73942	putative porin precursor
blr2277	1.08882	hypothetical protein
blr2337	1.56413	4-hydroxybenzoate hydroxylase	pobA
blr2351	-2.33643	unknown protein
blr2390	2.06764	vanillate O-demethylase oxygenase subunit (EC 1.2.3.12)	vanA
blr2393	-2.01159	hypothetical protein
blr2418	3.32769	hypothetical protein
blr2423	1.31092	cation efflux system protein
blr2429	-1.73697	unknown protein
blr2430	-1.11716	acyl-CoA hydrolase
blr2455	3.82477	isocitrate lyase (EC 4.1.3.1)
blr2456	-1.28983	hypothetical protein
blr2475	-1.20756	tryptophan-rich sensory protein
blr2501	-3.46753	hypothetical protein
blr2503	-2.152	glutathione S-transferase	gst
blr2505	-4.29336	hypothetical protein
blr2579	-2.21759	unknown protein
blr2582	1.4526	putative phosphoribulokinase protein	cbbP
blr2583	3.0505	transketolase	cbbT
blr2584	1.7941	putative fructose-1,6-bisphosphate aldolase protein	cbbA
blr2585	2.46441	ribulose 1,5-bisphosphate carboxylase-oxygenase large subunit
blr2587	1.3505	probable CbbX protein	cbbX
blr2591	-1.67116	serine protease DO-like protease	dop
blr2605	-2.59946	putative short chain dehydrogenase
blr2608	-1.08009	putative alkaline phosphatase transmembrane protein
blr2616	-1.56064	glutaryl-CoA dehydrogenase	gcdH
blr2642	-1.1047	unknown protein
blr2668	-1.36216	hypothetical protein
blr2753	1.40381	ABC transporter HlyB-MsbA family
blr2755	1.26903	hypothetical protein
blr2803	1.5612	ABC transporter nitrate-binding protein	nrtA
blr2805	1.22651	nitrate ABC transporter ATP-binding protein	nrtC
blr2806	2.10131	nitrite extrusion protein
blr2808	1.18333	putative nitrite reductase
blr2815	1.09828	putative transketolase family protein
blr2852	2.21319	hypothetical protein
blr2891	-1.59074	putative phenylacetic acid degradation protein
blr2893	-1.5951	putative phenylacetic acid degradation protein	paaC
blr2975	-1.12029	hypothetical protein
blr2981	-1.36959	hypothetical protein
blr2982	-2.9885	putative epoxide hydrolase protein
blr3005	-1.22432	hypothetical protein
blr3042	-1.79086	putative RNA polymerase sigma factor
blr3092	-1.34373	putative secreted protein
blr3124	1.82944	unknown protein
blr3165	1.00432	putative Adenine deaminase (EC 3.5.4.2)	ade1
blr3169	2.41224	hypothetical protein
blr3179	-1.68501	probable alanine dehydrogenase oxidoreductase protein
blr3200	2.54597	ABC transporter sugar-binding protein
blr3201	1.22712	sugar ABC transporter ATP-binding protein
blr3261	-1.02915	cobalamin synthesis protein
blr3278	-4.11779	hypothetical protein
blr3310	-3.52949	ABC transporter permease protein
blr3338	-1.15521	ABC transporter permease protein
blr3341	-2.30045	ABC transporter substrate-binding protein
blr3364	-2.4112	hypothetical protein
blr3389	-1.4344	probable ABC transporter substrate-binding protein
blr3394	-1.66658	transcriptional regulatory protein LacI family
blr3456	1.44148	hypothetical protein
blr3458	1.20163	putative acetate kinase (acetokinase) protein	ackA2
blr3459	1.62854	enoyl-[acyl-carrier-protein] reductase (NADH2) (EC 1.3.1.9)	fabI
blr3474	1.21475	probable Orn-Lys-Arg family decarboxylase
blr3477	1.35106	probable aspartate decarboxylase
blr3568	-2.152	ABC transporter permease protein
blr3596	-1.54793	hypothetical protein
blr3675	-2.9105	putative alcohol dehydrogenase (EC 1.1.1.1)
blr3719	-3.64928	hypothetical protein
blr3720	-1.72261	probable pyruvate dehydrogenase
blr3722	-2.84684	dihydrolipoamide dehydrogenase (EC 1.8.1.4)	lpd
blr3723	-1.22095	C4-dicarboxylate transport protein	dctA
blr3780	-1.53533	NAD synthetase	nadE
blr3797	-1.22432	phosphatidylserine synthase	pssA
blr3831	2.04089	ferredoxin NADP+ reductase	mvrA
blr3940	1.42707	putative propionyl-CoA carboxylase beta chain (EC 6.4.1.3)
blr3941	-2.41889	hypothetical protein
blr3942	-2.26534	hypothetical protein
blr3943	-2.152	hypothetical protein
blr3946	-2.32193	hypothetical protein
blr4182	-2.01742	hypothetical protein
blr4214	1.32135	unknown protein
blr4257	1.40054	putative hydrolase
blr4259	1.30159	hypothetical protein
blr4279	-1.662	hypothetical protein
blr4306	-1.05889	putative N-acetylmuramoyl-L-alanine amidase precursor (EC 3.5.1.28)
blr4438	-1.83136	hypothetical protein
blr4439	1.01863	penicillin binding protein
blr4455	-1.4112	putative outer-membrane immunogenic protein precursor
blr4473	-1.1488	hypothetical protein
blr4488	1.50131	two-component response regulator	ntrC
blr4508	2.22743	unknown protein
blr4553	1.77357	ABC transporter substrate-binding protein
blr4557	1.28688	ABC transporter ATP-binding protein
blr4635	1.24671	chaperonin GroEL	groEL5
blr4646	1.30685	hypothetical protein
blr4699	-1.48197	putative outer-membrane protein precursor
blr4974	-1.74178	polysaccharide biosynthesis glycosyltransferase
blr5025	-1.05589	hypothetical protein
blr5118	1.86631	unknown protein
blr5150	1.21412	hypothetical protein
blr5327	-1.92139	hypothetical protein
blr5341	3.37434	hypothetical protein
blr5345	-3.05889	transcriptional regulatory protein ArsR family
blr5374	-2.6529	hypothetical protein
blr5502	3.27352	hypothetical protein
blr5569	-1.53116	hypothetical protein
blr5598	-1.84684	ABC transporter permease protein
blr5599	-1.11404	ABC transporter permease protein
blr5658	2.41522	putative avidin
blr5693	-1.28983	probable substrate-binding protein
blr5707	-1.27579	putative threonine aldolase (EC 4.1.2.-)
blr5735	-3.1078	transcriptional regulatory protein Fis family
blr5751	-1.40354	glycine cleavage system component T	gcvT
blr5769	2.27828	unknown protein
blr5790	3.8125	putative lignostilbene-alpha,beta-dioxygenase
blr5792	2.45838	hypothetical protein
blr5802	-1.87832	ABC transporter substrate-binding protein
blr5803	-2.79586	ABC transporter permease protein
blr5804	-2.26534	ABC transporter ATP-binding protein
blr5805	-2.05889	transcriptional regulatory protein Crp family
blr5827	-1.486	flagellar basal-body rod protein	flgF
blr5838	-1.29336	flagellar P-ring protein precursor
blr5841	-1.95456	hypothetical protein
blr5860	-2.53952	transcriptional regulatory protein GntR family
blr5867	-1.30757	hypothetical protein
blr5909	1.48543	hypothetical protein
blr6067	1.41088	unknown protein
blr6127	-2.662	hypothetical protein
blr6138	-1.36959	hypothetical protein
blr6148	1.22219	ABC transporter substrate-binding protein
blr6167	1.36289	unknown protein
blr6172	4.68482	hypothetical protein
blr6202	-2.5649	hypothetical protein
blr6207	2.13455	probable quinoprotein ethanol dehydrogenase precursor (EC 1.1.99.-)	exaA
blr6213	2.44679	methanol dehydrogenase large subunit-like protein	mxaF'
blr6214	1.99892	putative cytochrome c protein
blr6216	1.45681	hypothetical protein	gfa
blr6267	-1.74662	Transcriptional regulator
blr6331	-1.32193	2-oxoisovalerate dehydrogenase alpha subunit	bkdA1
blr6338	-2.11404	hypothetical protein
blr6341	-1.39973	hypothetical protein
blr6408	-1.97143	transcriptional regulatory protein AraC family
blr6465	1.08066	putative steroid monooxygenase (EC 1.14.99.-)
blr6563	-1.39973	hypothetical protein
blr6576	-3.57175	hypothetical protein
blr6632	-1.5187	hypothetical protein
blr6652	1.10501	two-component hybrid sensor and regulator
blr6658	-1.68501	thiamine-phosphate pyrophosphorylase	thiE
blr6682	-1.33279	hypothetical protein
blr6725	-1.43831	putative multidrag resistance protein
blr6801	-1.04097	unknown protein
blr6829	-1.25498	transcriptional regulatory protein LysR family
blr6846	-1.03505	two-component response regulator
blr6918	-1.05589	probable substrate-binding protein
blr6951	-4.94342	molybdenum ABC transporter Molybdate-binding protein	modA
blr6952	-3.14561	molybdenum ABC transporter permease protein	modB
blr6953	-3.2109	molybdenum ABC transporter ATP-binding protein	modC2
blr6955	-1.72738	unknown protein
blr6963	-1.01742	transcriptional regulatory protein LysR family
blr6965	1.33342	putative dehalogenase
blr6984	1.07176	cyclohexanone monooxygenase (EC 1.14.13.22)
blr6997	-3.80591	probable flagellar hook assembly protein	flgD
blr7027	2.21506	hypothetical protein
blr7028	3.30641	Acetoacetate decarboxylase (EC 4.1.1.4)	adc2
blr7029	1.57966	d-beta-hydroxybutyrate dehydrogenase	bdhA
blr7061	-2.699	hypothetical protein
blr7064	-1.32193	probable ABC transporter substrate-binding protein
blr7084	1.11237	transcriptional regulatory protein Crp family	nnrR
blr7099	-1.14242	probable ABC transporter substrate-binding protein
blr7100	-1.13924	probable ABC transporter permease protein
blr7102	-1.59946	unknown protein
blr7133	2.33571	hypothetical protein
blr7227	1.98295	hypothetical protein
blr7274	-1.42275	serine protease
blr7289	-2.47393	putative alkanal monooxygenase	luxA2
blr7314	5.57531	unknown protein
blr7315	4.3427	unknown protein
blr7321	4.27947	hypothetical protein
blr7323	1.68482	probable ArcD1 arginine-ornithine antiporter
blr7324	2.7615	hypothetical protein
blr7326	2.03668	hypothetical protein
blr7327	5.98048	hypothetical protein
blr7329	2.00971	putative multidrag resistance protein
blr7330	1.33914	AcrB-AcrD-AcrF family protein
blr7331	-1.04097	hypothetical protein
blr7359	-1.59074	transcriptional regulatory protein ArsR family
blr7491	2.29778	putative 2-keto-gluconate dehydrogenase
blr7556	-1.87832	non-heme haloperoxidase
blr7566	3.30524	oxidoreductase
blr7593	2.66789	multidrug resistance efflux pump
blr7625	-1.29336	probable mandelate racemase (EC 5.1.2.2)
blr7629	-1.1078	hypothetical protein
blr7651	1.53854	hypothetical protein
blr7737	-1.07704	putative adenylate cyclase
blr7743	-1.38836	glutamate synthase large subunit	gltB
blr7744	-1.2109	glutamate synthase, small subunit	gltD
blr7759	-2.68038	ornithine decarboxylase	speF
blr7760	-2.25843	hypothetical protein
blr7761	-3.9885	hypothetical protein
blr7762	-1.62149	homospermidine synthase
blr7780	-2.08314	hypothetical protein
blr7848	-1.96578	probable substrate-binding protein
blr7878	-1.21759	unknown protein
blr7879	-1.32193	unknown protein
blr7881	-1.23786	transcriptional regulatory protein ArsR family
blr7892	-2.699	putative glutathione S-transferase
blr7893	-1.41504	putative beta-lactamase
blr7895	-1.56918	hypothetical protein
blr7905	1.21909	Citrate-proton symporter	cit
blr7922	-2.78588	ABC transporter substrate-binding protein
blr7948	-1.28983	probable acetyltransferase (EC.2.3.1.28)
blr7974	-1.92139	hypothetical protein
blr7975	-3.15843	hypothetical protein
blr7997	-1.16812	unknown protein
blr8010	-1.18442	unknown protein
blr8063	1.46989	unknown protein
blr8104	-1.45008	2,3,4,5-tetrahydropyridine-2-carboxylate N-succinyltransferase	dapD
blr8160	-2.191	ABC transporter molybdenum-binding protein	modA
blr8234	-4.72929	unknown protein
bsl0059	-3.37932	cold shock protein
bsl0158	-1.1488	hypothetical protein
bsl0169	1.60834	unknown protein
bsl0296	1.168	unknown protein
bsl1405	1.87539	hypothetical protein
bsl1442	-2.55639	pilus assembly protein pilin subunit	ctpA
bsl1445	-1.26882	cold shock protein	cspA
bsl1473	2.88792	hypothetical protein
bsl1637	-5.74855	unknown protein
bsl1651	4.18666	unknown protein
bsl1652	4.77241	unknown protein
bsl1772	-2.55639	unknown protein
bsl1808	5.05094	unknown protein
bsl1856	-3.22432	putative transposase
bsl1857	-4.83239	unknown protein
bsl1871	-3.23786	unknown protein
bsl2014	-3.51622	unknown protein
bsl2015	-3.851	NolZ protein	nolZ
bsl2020	-2.662	hypothetical protein
bsl2206	1.51954	hypothetical protein
bsl2596	4.95931	unknown protein
bsl3118	-1.7084	probable PilA2 pilus assembly protein
bsl4152	-2.05289	unknown protein
bsl4407	2.75531	unknown protein
bsl4522	-1.90509	unknown protein
bsl4593	-2.03505	unknown protein
bsl4703	-2.47393	hypothetical protein
bsl5486	1.63645	unknown protein
bsl6617	2.43856	unknown protein
bsl6929	-2.78588	hydrogenase expression-formation protein	hypC
bsl6938	-1.68038	hydrogenase expression-formation protein	hupF
bsl7397	1.05311	hypothetical protein
bsl7464	-1.12343	hypothetical protein
bsl7850	-1.13289	unknown protein
bsl8075	-2.25843	unknown protein
bsr0093	-2.07704	unknown protein
bsr0701	1.10434	hypothetical protein
bsr0858	3.08831	hypothetical protein
bsr0859	3.7845	hypothetical protein
bsr1677	2.27352	hypothetical protein
bsr1739	-5.1078	ferredoxin	fdxN
bsr1749	-4.44222	hypothetical protein
bsr1750	-3.77398	ferredoxin	fer3
bsr1757	-5.04454	nitrogen fixation protein
bsr1758	-5.14305	unknown protein
bsr1760	-5.86986	ferredoxin-like protein	frxA
bsr1764	-4.43284	unknown protein
bsr1775	-6.27649	probable ferredoxin	fixX
bsr1809	1.98258	unknown protein
bsr1820	4.88899	RhcS protein	rhcS
bsr1878	-3.55979	unknown protein
bsr1907	-4.00462	unknown protein
bsr1956	-1.79086	hypothetical protein
bsr2005	-4.35698	unknown protein
bsr2010	-5.97483	unknown protein
bsr2013	-3.25154	unknown protein
bsr2051	-2.53116	unknown protein
bsr2127	-3.86355	unknown protein
bsr2797	3.90111	hypothetical protein
bsr2847	-2.73697	unknown protein
bsr3197	-3.08314	putative ferredoxin
bsr3484	1.2135	hypothetical protein
bsr3833	1.41305	hypothetical protein
bsr4406	-1.25498	unknown protein
bsr4834	-1.63487	unknown protein
bsr5179	-1.26188	transcriptional regulatory protein LuxR family
bsr5316	-1.75147	hypothetical protein
bsr6998	-1.81604	hypothetical protein
bsr7049	1.30276	unknown protein
bsr7259	-1.11404	cold shock protein	cspA
bsr7384	-1.57347	unknown protein
bsr7503	-1.36959	unknown protein
bsr7510	-1.2863	hypothetical protein
bsr7725	-1.05589	hypothetical protein
bsr7757	-2.71786	hypothetical protein
bsr8137	-1.8625	similar to sigma-70 subunit

## Sheet: Table S7
Table S7. Metabolites showing altered abundance only in soybean nodules induced by the B. diazoefficiens nifA mutant A9 as compared to wild type-elicited nodules.
Metabolites a	Formula	m/z	Log2(nifA nod vs. wt nod) b	q-Value (Storey) c	ID a
3-Oxotetradecanoyl-CoA	C35H60N7O18P3S	990.286	-2.05805	8.83578e-07	C05261
D-Glucono-1,5-lactone	C6H10O6	177.04	-1.8745	3.42904e-05	C00198
alpha,alpha'-Trehalose 6-phosphate	C12H23O14P	421.077	-1.55564	4.58426e-05	C00689
Anthranilate	C7H7NO2	136.04	-1.51763	3.43392e-06	C00108
13(S)-HODE	C18H32O3	295.228	-1.45623	9.43941e-05	C14762
Benzamide	C7H7NO	120.045	-1.44458	5.14212e-06	C09815
Fumarate	C4H4O4	115.004	-1.44349	2.98603e-07	C00122
Thymine	C5H6N2O2	125.036	-1.40567	5.59689e-07	C00178
Glyoxylate	C2H2O3	72.9934	-1.37417	4.0484e-05	C00048
Benzene-1,2,4-triol	C6H6O3	125.024	-1.35605	2.0951e-09	C02814
O-Phospho-4-hydroxy-L-threonine	C4H10NO7P	214.012	-1.32007	0.000105667	C06055
(S)-Malate	C4H6O5	133.015	-1.28851	2.87451e-09	C00149
1-(5-Phospho-D-ribosyl)-5-amino-4-imidazolecarboxy	C9H14N3O9P	338.038	-1.2823	4.47537e-07	C04751
N-Acetylputrescine	C6H14N2O	129.103	-1.25657	1.37271e-05	C02714
Acrylic acid	C3H4O2	71.014	-1.2539	6.0806e-05	C00511
2-Oxoadipate	C6H8O5	159.03	-1.23863	2.95335e-08	C00322
Pyridoxal	C8H9NO3	166.05	-1.21572	7.5415e-06	C00250
Dopamine	C8H11NO2	152.071	-1.18202	6.38235e-07	C03758
(R)-2-Methylmalate	C5H8O5	147.03	-1.15976	3.51035e-05	C02612
Pyruvate	C3H4O3	87.0087	-1.10242	4.47537e-07	C00022
2-Dehydro-3-deoxy-L-fuconate	C6H10O5	161.045	-1.05332	3.42173e-08	C03827
Tyramine	C8H11NO	136.076	-0.966711	2.44729e-06	C00483
D-Glucuronolactone	C6H8O6	175.025	-0.961732	0.00103822	C02670
Tetrahydropteroyltri-L-glutamate	C29H37N9O12	702.248	-0.95549	8.48741e-05	C04144
(R)-3-Hydroxybutanoate	C4H8O3	103.04	-0.950052	0.000138488	C01089
Uridine	C9H12N2O6	243.062	-0.913932	7.91995e-05	C00299
Glycerone	C3H6O3	89.0244	-0.892621	1.56179e-06	C00184
2-Dehydropantoate	C6H10O4	145.05	-0.873785	0.000212451	C00966
GDP	C10H15N5O11P2	442.017	-0.854097	1.44385e-05	C00035
5-Methylthio-D-ribose	C6H12O4S	179.038	-0.849767	5.55226e-06	C03089
L-Fuculose 1-phosphate	C6H13O8P	243.027	-0.838871	0.000138488	C01099
Pyridoxamine	C8H12N2O2	167.082	-0.83677	4.58952e-06	C00534
L-Aspartate 4-semialdehyde	C4H7NO3	116.035	-0.830288	1.4749e-05	C00441
2-Isopropylmaleate	C7H10O4	157.05	-0.805046	3.40852e-07	C02631
3-Methyl-cis,cis-hexadienedioate	C7H8O4	155.035	-0.779397	2.28207e-08	C04112
Ectoine	C6H10N2O2	141.068	-0.77833	4.55876e-05	C06231
N-Acetylornithine	C7H14N2O3	173.093	-0.769172	7.90168e-05	C00437
5-Phosphoribosylamine	C5H12NO7P	228.027	-0.730187	0.00372813	C03090
Formylanthranilate	C8H7NO3	164.035	-0.705662	1.06913e-06	C05653
2,4-Diamino-6-nitrotoluene	C7H9N3O2	166.06	-0.693106	2.2674e-06	C16396
2-Deoxy-D-ribose 1-phosphate	C5H11O7P	213.016	-0.666813	0.00218924	C00672
trans-Cinnamate	C9H8O2	147.045	-0.622605	2.43327e-05	C00423
D-Galacturonate	C6H10O7	193.035	-0.612733	1.37271e-05	C00333
ADP	C10H15N5O10P2	426.022	-0.610342	0.00564573	C00008
3',5'-Cyclic GMP	C10H12N5O7P	344.04	-0.59289	0.00028232	C00942
cis-3-(Carboxy-ethyl)-3,5-cyclo-hexadiene-1,2-diol	C9H12O4	183.066	-0.573834	2.0478e-06	C11588
4-Hydroxyphenylglyoxylate	C8H6O4	165.019	-0.56608	1.37958e-05	C03590
3-Hydroxyanthranilate	C7H7NO3	152.034	-0.548885	0.000100469	C00632
Toluate	C8H8O2	135.045	-0.546968	3.7681e-06	C01454
Ribitol	C5H12O5	151.061	-0.538439	1.4992e-05	C00474
GDP-mannose	C16H25N5O16P2	604.069	-0.531164	0.000686577	C00096
D-4'-Phosphopantothenate	C9H18NO8P	298.069	-0.524007	1.81915e-05	C03492
Protoanemonin	C5H4O2	95.0139	-0.512554	0.00114028	C07090
Phenylacetaldehyde	C8H8O	119.05	0.542358	2.1522e-05	C00601
1-Aminocyclopropane-1-carboxylate	C4H7NO2	100.04	0.560694	0.00137638	C01234
Porphobilinogen	C10H14N2O4	225.087	0.593943	2.0478e-06	C00931
2-Furoate	C5H4O3	111.009	0.692996	0.000263532	C01546
dCMP	C9H14N3O7P	306.049	0.758508	6.76387e-06	C00239
Hippurate	C9H9NO3	178.051	0.850399	0.00737386	C01586
Cortol	C21H36O5	367.249	0.862304	4.01285e-06	C05482
Oxalate	C2H2O4	88.9881	0.937183	0.000182461	C00209
UMP	C9H13N2O9P	323.029	0.94614	0.00461299	C00105
D-Fructose 1,6-bisphosphate	C6H14O12P2	338.989	0.95981	1.81915e-05	C00354
meso-Tartaric acid	C4H6O6	149.009	1.00037	0.000684084	C00552
2-(Formamido)-N1-(5'-phosphoribosyl)acetamidine	C8H16N3O8P	312.059	1.01613	9.95375e-05	C04640
Resveratrol	C14H12O3	227.071	1.16947	0.00028232	C03582
Xanthosine 5'-phosphate	C10H13N4O9P	363.035	1.17053	1.55747e-07	C00655
Lipoamide	C8H15NOS2	204.052	1.61238	1.56421e-07	C00248
N-Cyclohexylformamide	C7H13NO	126.092	2.10323	0.000305147	C11519
Bis(4-hydroxyphenyl)methanol	C13H12O3	215.071	2.92033	0.000774027	C18215
Dihydrobiopterin	C9H13N5O3	238.094	3.22995	0.00611478	C00268
a Metabolite name and ID according to the KEGG.
b Log2 Fold change (FC) of metabolite level, comparing nodules induced by the mutant strain with wild-type nodules.
c q-value calculated according to Storey et al. 2003 (Storey, J.D.; Tibshirani, R. Statistical significance for genomewide studies. PNAS 2003, 100, 9440–9445).
